# Supplementary material for: Comprehensive Identification of Glycosphingolipids in Human Plasma Using Hydrophilic Interaction Liquid Chromatography—Electrospray Ionization Mass Spectrometry
Source: PubMed Central journal article supplement (PMC7996953; doi:10.3390/metabo11030140), 2021-02-26
Supplement: metabolites-11-00140-s001.pdf [file metabolites-11-00140-s001.pdf]

## SUPPLEMENTARY MATERIALS

### **Comprehensive Identification of Glycosphingolipids in Human Plasma using Hydrophilic Interaction Liquid Chromatography – Electrospray Ionization Mass Spectrometry**

Karel Hořejší<sup>a,b</sup>, Robert Jirásko<sup>a</sup>, Michaela Chocholoušková<sup>a</sup>, Denise Wolrab<sup>a</sup>, David Kahoun<sup>b</sup>,  
and Michal Holčapek<sup>a,\*</sup>

*<sup>a</sup> Department of Analytical Chemistry, Faculty of Chemical Technology, University of Pardubice, Studentská 573, 532 10, Pardubice, Czech Republic*

*<sup>b</sup> Institute of Chemistry, Faculty of Science, University of South Bohemia in České Budějovice, Branišovská 1760, 370 05, České Budějovice, Czech Republic*

\*Corresponding author: Michal Holčapek, Department of Analytical Chemistry, Faculty of Chemical Technology, University of Pardubice, Studentská 573, 532 10, Pardubice, Czech Republic, Tel.: +420-466037087; Fax: +420-466037068; E-mail: Michal.Holcapek@upce.cz

**Tables: 3**

**Figures: 131**

**Table S1.** List of used SPE cartridges with more detailed specification.

| SPE cartridge        | Sorbent Type            | Volume [mL]     | Sorbent mass [mg] | Carbon load [%] | Vendors             |
|----------------------|-------------------------|-----------------|-------------------|-----------------|---------------------|
| Discovery DSC-8      | Silica-based            | 3               | 500               | 9               | Supelco             |
| Discovery DSC-18 (A) |                         | 3               | 500               | 18              | Supelco             |
| Discovery DSC-18 (B) |                         | 6               | 500               | 18              | Supelco             |
| Discovery DSC-C18Lt  |                         | 3               | 500               | 11              | Supelco             |
| Supelclean ENVI-C18  |                         | 3               | 500               | 17              | Supelco             |
| Strata C18-E         |                         | 3               | 500               | 18              | Phenomenex          |
| Sep-Pak tC18         |                         | 3               | 200               | 17              | Waters              |
| Spe-ed C18/18        |                         | 3               | 500               | 18              | Applied Separations |
| Strata SDB-L         |                         | Polymeric-based | 3                 | 500             | -----               |
| Strata X             | 3                       |                 | 500               | -----           | Phenomenex          |
| Oasis HLB            | 6                       |                 | 1000              | -----           | Waters              |
| Diol                 | Normal phase            | 3               | 200               | -----           | GracePure           |
| Phree                | ZrO <sub>2</sub> -based | 1               | 30                | -----           | Phenomenex          |
| HybridSPE            |                         | 1               | 30                | -----           | Merck               |

**Table S2.** Characteristic fragment ions (theoretical  $m/z$ ) of selected neutral GSL species with the most common sphingosine base 18:1 that may be observed in positive ion ESI-MS/MS spectra.

| Sphingosine base<br>18:1 | SACCHARIDE PART      |                |                                     |                    |                                     |                    |                                     |                    |                                     |                    | CERAMIDE PART   |          |          | Gal-NAc-Gal<br>(Gb <sub>4</sub> fragments) |                |
|--------------------------|----------------------|----------------|-------------------------------------|--------------------|-------------------------------------|--------------------|-------------------------------------|--------------------|-------------------------------------|--------------------|-----------------|----------|----------|--------------------------------------------|----------------|
|                          | HexCer               |                |                                     |                    |                                     |                    |                                     |                    |                                     |                    |                 |          |          |                                            |                |
|                          | Z <sub>0</sub>       | Y <sub>0</sub> | [M+H-H <sub>2</sub> O] <sup>+</sup> | [M+H] <sup>+</sup> |                                     |                    |                                     |                    |                                     |                    |                 |          |          |                                            |                |
|                          | Hex <sub>2</sub> Cer |                |                                     |                    |                                     |                    |                                     |                    |                                     |                    |                 |          |          |                                            |                |
|                          | Z <sub>0</sub>       | Y <sub>0</sub> | Z <sub>1</sub>                      | Y <sub>1</sub>     | [M+H-H <sub>2</sub> O] <sup>+</sup> | [M+H] <sup>+</sup> |                                     |                    |                                     |                    |                 |          |          |                                            |                |
|                          | Gb <sub>3</sub>      |                |                                     |                    |                                     |                    |                                     |                    |                                     |                    |                 |          |          |                                            |                |
|                          | Z <sub>0</sub>       | Y <sub>0</sub> | Z <sub>1</sub>                      | Y <sub>1</sub>     | Z <sub>2</sub>                      | Y <sub>2</sub>     | [M+H-H <sub>2</sub> O] <sup>+</sup> | [M+H] <sup>+</sup> |                                     |                    |                 |          |          |                                            |                |
| Gb <sub>4</sub>          |                      |                |                                     |                    |                                     |                    |                                     |                    |                                     |                    |                 |          |          |                                            |                |
| N-acyl                   | Z <sub>0</sub>       | Y <sub>0</sub> | Z <sub>1</sub>                      | Y <sub>1</sub>     | Z <sub>2</sub>                      | Y <sub>2</sub>     | Z <sub>3</sub>                      | Y <sub>3</sub>     | [M+H-H <sub>2</sub> O] <sup>+</sup> | [M+H] <sup>+</sup> | N <sup>II</sup> | S        | T        | B <sub>1</sub>                             | C <sub>1</sub> |
| 12:0                     | 464.4462             | 482.4568       | 626.4990                            | 644.5096           | 788.5518                            | 806.5624           | 950.6047                            | 968.6152           | 1153.6840                           | 1171.6946          | 264.2656        | 242.2114 | 226.2165 | 366.1395                                   | 384.1500       |
| 13:0                     | 478.4618             | 496.4724       | 640.5147                            | 658.5252           | 802.5675                            | 820.5781           | 964.6203                            | 982.6309           | 1167.6997                           | 1185.7103          | 264.2656        | 256.2271 | 240.2322 | 366.1395                                   | 384.1500       |
| 14:0                     | 492.4775             | 510.4881       | 654.5303                            | 672.5409           | 816.5831                            | 834.5937           | 978.6360                            | 996.6465           | 1181.7153                           | 1199.7259          | 264.2656        | 270.2427 | 254.2478 | 366.1395                                   | 384.1500       |
| 15:0                     | 506.4931             | 524.5037       | 668.5460                            | 686.5565           | 830.5988                            | 848.6094           | 992.6516                            | 1010.6622          | 1195.7310                           | 1213.7416          | 264.2656        | 284.2584 | 268.2635 | 366.1395                                   | 384.1500       |
| 15:1                     | 504.4775             | 522.4881       | 666.5303                            | 684.5409           | 828.5831                            | 846.5937           | 990.6359                            | 1008.6465          | 1193.7153                           | 1211.7259          | 264.2656        | 282.2427 | 266.2478 | 366.1395                                   | 384.1500       |
| 15:0 OH                  | 522.4881             | 540.4986       | 684.5409                            | 702.5515           | 846.5937                            | 864.6043           | 1008.6465                           | 1026.6571          | 1211.7259                           | 1229.7365          | 264.2656        | 300.2533 | 284.2584 | 366.1395                                   | 384.1500       |
| 16:0                     | 520.5088             | 538.5194       | 682.5616                            | 700.5722           | 844.6144                            | 862.6250           | 1006.6673                           | 1024.6778          | 1209.7466                           | 1227.7572          | 264.2656        | 298.2740 | 282.2791 | 366.1395                                   | 384.1500       |
| 16:1                     | 518.4931             | 536.5037       | 680.5460                            | 698.5565           | 842.5988                            | 860.6094           | 1004.6516                           | 1022.6622          | 1207.7310                           | 1225.7416          | 264.2656        | 296.2584 | 280.2635 | 366.1395                                   | 384.1500       |
| 16:0 OH                  | 536.5037             | 554.5143       | 698.5565                            | 716.5671           | 860.6094                            | 878.6199           | 1022.6622                           | 1040.6728          | 1225.7416                           | 1243.7521          | 264.2656        | 314.2690 | 298.2740 | 366.1395                                   | 384.1500       |
| 16:1 OH                  | 534.4881             | 552.4986       | 696.5409                            | 714.5515           | 858.5937                            | 876.6043           | 1020.6465                           | 1038.6571          | 1223.7259                           | 1241.7365          | 264.2656        | 312.2533 | 296.2584 | 366.1395                                   | 384.1500       |
| 17:0                     | 534.5244             | 552.5350       | 696.5773                            | 714.5878           | 858.6301                            | 876.6407           | 1020.6829                           | 1038.6935          | 1223.7623                           | 1241.7729          | 264.2656        | 312.2897 | 296.2948 | 366.1395                                   | 384.1500       |
| 17:1                     | 532.5088             | 550.5194       | 694.5616                            | 712.5722           | 856.6144                            | 874.6250           | 1018.6672                           | 1036.6778          | 1221.7466                           | 1239.7572          | 264.2656        | 310.2740 | 294.2791 | 366.1395                                   | 384.1500       |
| 17:0 OH                  | 550.5194             | 568.5299       | 712.5722                            | 730.5828           | 874.6250                            | 892.6356           | 1036.6778                           | 1054.6884          | 1239.7572                           | 1257.7678          | 264.2656        | 328.2846 | 312.2897 | 366.1395                                   | 384.1500       |
| 18:0                     | 548.5401             | 566.5507       | 710.5929                            | 728.6035           | 872.6457                            | 890.6563           | 1034.6986                           | 1052.7091          | 1237.7779                           | 1255.7885          | 264.2656        | 326.3053 | 310.3104 | 366.1395                                   | 384.1500       |
| 18:1                     | 546.5244             | 564.5350       | 708.5773                            | 726.5878           | 870.6301                            | 888.6407           | 1032.6829                           | 1050.6935          | 1235.7623                           | 1253.7729          | 264.2656        | 324.2897 | 308.2948 | 366.1395                                   | 384.1500       |
| 18:2                     | 544.5088             | 562.5194       | 706.5616                            | 724.5722           | 868.6144                            | 886.6250           | 1030.6672                           | 1048.6778          | 1233.7466                           | 1251.7572          | 264.2656        | 322.2740 | 306.2791 | 366.1395                                   | 384.1500       |
| 18:0 OH                  | 564.5350             | 582.5456       | 726.5878                            | 744.5984           | 888.6407                            | 906.6512           | 1050.6935                           | 1068.7041          | 1253.7729                           | 1271.7834          | 264.2656        | 342.3003 | 326.3053 | 366.1395                                   | 384.1500       |
| 18:1 OH                  | 562.5194             | 580.5299       | 724.5722                            | 742.5828           | 886.6250                            | 904.6356           | 1048.6778                           | 1066.6884          | 1251.7572                           | 1269.7678          | 264.2656        | 340.2846 | 324.2897 | 366.1395                                   | 384.1500       |
| 19:0                     | 562.5557             | 580.5663       | 724.6086                            | 742.6191           | 886.6614                            | 904.6720           | 1048.7142                           | 1066.7248          | 1251.7936                           | 1269.8042          | 264.2656        | 340.3210 | 324.3261 | 366.1395                                   | 384.1500       |
| 19:1                     | 560.5401             | 578.5507       | 722.5929                            | 740.6035           | 884.6457                            | 902.6563           | 1046.6985                           | 1064.7091          | 1249.7779                           | 1267.7885          | 264.2656        | 338.3053 | 322.3104 | 366.1395                                   | 384.1500       |
| 19:0 OH                  | 578.5507             | 596.5612       | 740.6035                            | 758.6141           | 902.6563                            | 920.6669           | 1064.7091                           | 1082.7197          | 1267.7885                           | 1285.7991          | 264.2656        | 356.3159 | 340.3210 | 366.1395                                   | 384.1500       |
| 20:0                     | 576.5714             | 594.5820       | 738.6242                            | 756.6348           | 900.6770                            | 918.6876           | 1062.7299                           | 1080.7404          | 1265.8092                           | 1283.8198          | 264.2656        | 354.3366 | 338.3417 | 366.1395                                   | 384.1500       |
| 20:1                     | 574.5557             | 592.5663       | 736.6086                            | 754.6191           | 898.6614                            | 916.6720           | 1060.7142                           | 1078.7248          | 1263.7936                           | 1281.8042          | 264.2656        | 352.3210 | 336.3261 | 366.1395                                   | 384.1500       |
| 20:2                     | 572.5401             | 590.5507       | 734.5929                            | 752.6035           | 896.6457                            | 914.6563           | 1058.6985                           | 1076.7091          | 1261.7779                           | 1279.7885          | 264.2656        | 350.3053 | 334.3104 | 366.1395                                   | 384.1500       |
| 20:0 OH                  | 592.5663             | 610.5769       | 754.6191                            | 772.6297           | 916.6720                            | 934.6825           | 1078.7248                           | 1096.7354          | 1281.8042                           | 1299.8147          | 264.2656        | 370.3316 | 354.3366 | 366.1395                                   | 384.1500       |
| 20:1 OH                  | 590.5507             | 608.5612       | 752.6035                            | 770.6141           | 914.6563                            | 932.6669           | 1076.7091                           | 1094.7197          | 1279.7885                           | 1297.7991          | 264.2656        | 368.3159 | 352.3210 | 366.1395                                   | 384.1500       |
| 21:0                     | 590.5870             | 608.5976       | 752.6399                            | 770.6504           | 914.6927                            | 932.7033           | 1076.7455                           | 1094.7561          | 1279.8249                           | 1297.8355          | 264.2656        | 368.3523 | 352.3574 | 366.1395                                   | 384.1500       |
| 21:1                     | 588.5714             | 606.5820       | 750.6242                            | 768.6348           | 912.6770                            | 930.6876           | 1074.7298                           | 1092.7404          | 1277.8092                           | 1295.8198          | 264.2656        | 366.3366 | 350.3417 | 366.1395                                   | 384.1500       |
| 21:0 OH                  | 606.5820             | 624.5925       | 768.6348                            | 786.6454           | 930.6876                            | 948.6982           | 1092.7404                           | 1110.7510          | 1295.8198                           | 1313.8304          | 264.2656        | 384.3472 | 368.3523 | 366.1395                                   | 384.1500       |
| 22:0                     | 604.6027             | 622.6133       | 766.6555                            | 784.6661           | 928.7083                            | 946.7189           | 1090.7612                           | 1108.7717          | 1293.8405                           | 1311.8511          | 264.2656        | 382.3679 | 366.3730 | 366.1395                                   | 384.1500       |
| 22:1                     | 602.5870             | 620.5976       | 764.6399                            | 782.6504           | 926.6927                            | 944.7033           | 1088.7455                           | 1106.7561          | 1291.8249                           | 1309.8355          | 264.2656        | 380.3523 | 364.3574 | 366.1395                                   | 384.1500       |
| 22:2                     | 600.5714             | 618.5820       | 762.6242                            | 780.6348           | 924.6770                            | 942.6876           | 1086.7298                           | 1104.7404          | 1289.8091                           | 1307.8197          | 264.2656        | 378.3365 | 362.3416 | 366.1395                                   | 384.1500       |
| 22:0 OH                  | 620.5976             | 638.6082       | 782.6504                            | 800.6610           | 944.7033                            | 962.7138           | 1106.7561                           | 1124.7667          | 1309.8355                           | 1327.8460          | 264.2656        | 398.3629 | 382.3679 | 366.1395                                   | 384.1500       |

|                |          |          |          |          |           |           |           |           |           |           |          |          |          |          |          |
|----------------|----------|----------|----------|----------|-----------|-----------|-----------|-----------|-----------|-----------|----------|----------|----------|----------|----------|
| <b>22:1 OH</b> | 618.5820 | 636.5925 | 780.6348 | 798.6454 | 942.6876  | 960.6982  | 1104.7404 | 1122.7510 | 1307.8198 | 1325.8304 | 264.2656 | 396.3472 | 380.3523 | 366.1395 | 384.1500 |
| <b>23:0</b>    | 618.6183 | 636.6289 | 780.6712 | 798.6817 | 942.7240  | 960.7346  | 1104.7768 | 1122.7874 | 1307.8562 | 1325.8668 | 264.2656 | 396.3836 | 380.3887 | 366.1395 | 384.1500 |
| <b>23:1</b>    | 616.6027 | 634.6133 | 778.6555 | 796.6661 | 940.7083  | 958.7189  | 1102.7611 | 1120.7717 | 1305.8405 | 1323.8511 | 264.2656 | 394.3679 | 378.3730 | 366.1395 | 384.1500 |
| <b>23:0 OH</b> | 634.6133 | 652.6238 | 796.6661 | 814.6767 | 958.7189  | 976.7295  | 1120.7717 | 1138.7823 | 1323.8511 | 1341.8617 | 264.2656 | 412.3785 | 396.3836 | 366.1395 | 384.1500 |
| <b>24:0</b>    | 632.6340 | 650.6446 | 794.6868 | 812.6974 | 956.7396  | 974.7502  | 1118.7925 | 1136.8030 | 1321.8718 | 1339.8824 | 264.2656 | 410.3992 | 394.4043 | 366.1395 | 384.1500 |
| <b>24:1</b>    | 630.6183 | 648.6289 | 792.6712 | 810.6817 | 954.7240  | 972.7346  | 1116.7768 | 1134.7874 | 1319.8562 | 1337.8668 | 264.2656 | 408.3836 | 392.3887 | 366.1395 | 384.1500 |
| <b>24:2</b>    | 628.6027 | 646.6133 | 790.6555 | 808.6661 | 952.7083  | 970.7189  | 1114.7611 | 1132.7717 | 1317.8405 | 1335.8511 | 264.2656 | 406.3679 | 390.3730 | 366.1395 | 384.1500 |
| <b>24:0 OH</b> | 648.6289 | 666.6395 | 810.6817 | 828.6923 | 972.7346  | 990.7451  | 1134.7874 | 1152.7980 | 1337.8668 | 1355.8773 | 264.2656 | 426.3942 | 410.3992 | 366.1395 | 384.1500 |
| <b>24:1 OH</b> | 646.6133 | 664.6238 | 808.6661 | 826.6767 | 970.7189  | 988.7295  | 1132.7717 | 1150.7823 | 1335.8511 | 1353.8617 | 264.2656 | 424.3785 | 408.3836 | 366.1395 | 384.1500 |
| <b>25:0</b>    | 646.6496 | 664.6602 | 808.7025 | 826.7130 | 970.7553  | 988.7659  | 1132.8081 | 1150.8187 | 1335.8875 | 1353.8981 | 264.2656 | 424.4149 | 408.4200 | 366.1395 | 384.1500 |
| <b>25:1</b>    | 644.6340 | 662.6446 | 806.6868 | 824.6974 | 968.7396  | 986.7502  | 1130.7924 | 1148.8030 | 1333.8718 | 1351.8824 | 264.2656 | 422.3992 | 406.4043 | 366.1395 | 384.1500 |
| <b>25:0 OH</b> | 662.6446 | 680.6551 | 824.6974 | 842.7080 | 986.7502  | 1004.7608 | 1148.8030 | 1166.8136 | 1351.8824 | 1369.8930 | 264.2656 | 440.4098 | 424.4149 | 366.1395 | 384.1500 |
| <b>26:0</b>    | 660.6653 | 678.6759 | 822.7181 | 840.7287 | 984.7709  | 1002.7815 | 1146.8238 | 1164.8343 | 1349.9031 | 1367.9137 | 264.2656 | 438.4305 | 422.4356 | 366.1395 | 384.1500 |
| <b>26:1</b>    | 658.6496 | 676.6602 | 820.7025 | 838.7130 | 982.7553  | 1000.7659 | 1144.8081 | 1162.8187 | 1347.8875 | 1365.8981 | 264.2656 | 436.4149 | 420.4200 | 366.1395 | 384.1500 |
| <b>26:2</b>    | 656.6340 | 674.6446 | 818.6868 | 836.6974 | 980.7396  | 998.7502  | 1142.7924 | 1160.8030 | 1345.8718 | 1363.8824 | 264.2656 | 434.3992 | 418.4043 | 366.1395 | 384.1500 |
| <b>26:0 OH</b> | 676.6602 | 694.6708 | 838.7130 | 856.7236 | 1000.7659 | 1018.7764 | 1162.8187 | 1180.8293 | 1365.8981 | 1383.9086 | 264.2656 | 454.4255 | 438.4305 | 366.1395 | 384.1500 |
| <b>26:1 OH</b> | 674.6446 | 692.6551 | 836.6974 | 854.7080 | 998.7502  | 1016.7608 | 1160.8030 | 1178.8136 | 1363.8824 | 1381.8930 | 264.2656 | 452.4098 | 436.4149 | 366.1395 | 384.1500 |
| <b>27:0</b>    | 674.6809 | 692.6915 | 836.7338 | 854.7443 | 998.7866  | 1016.7972 | 1160.8394 | 1178.8500 | 1363.9188 | 1381.9294 | 264.2656 | 452.4462 | 436.4513 | 366.1395 | 384.1500 |
| <b>27:0 OH</b> | 690.6759 | 708.6864 | 852.7287 | 870.7393 | 1014.7815 | 1032.7921 | 1176.8343 | 1194.8449 | 1379.9137 | 1397.9243 | 264.2656 | 468.4411 | 452.4462 | 366.1395 | 384.1500 |
| <b>28:0</b>    | 688.6966 | 706.7072 | 850.7494 | 868.7600 | 1012.8022 | 1030.8128 | 1174.8551 | 1192.8656 | 1377.9344 | 1395.9450 | 264.2656 | 466.4618 | 450.4669 | 366.1395 | 384.1500 |
| <b>28:0 OH</b> | 704.6915 | 722.7021 | 866.7443 | 884.7549 | 1028.7972 | 1046.8077 | 1190.8500 | 1208.8606 | 1393.9294 | 1411.9399 | 264.2656 | 482.4568 | 466.4618 | 366.1395 | 384.1500 |

**Table S3.** List of lipid species identified in human plasma using HILIC-ESI-MS/MS method.

| Lipid species          | Fatty acyl level       | Elemental composition (neutral form)            | Theoretical <i>m/z</i> of ion | Observed <i>m/z</i> of ion | Type of detected ion | Mean absolute intensity | RSD [%] | RT [min]                   |
|------------------------|------------------------|-------------------------------------------------|-------------------------------|----------------------------|----------------------|-------------------------|---------|----------------------------|
| <b>Cer<sup>a</sup></b> |                        |                                                 |                               |                            |                      |                         |         |                            |
| 32:1                   |                        | C <sub>32</sub> H <sub>63</sub> NO <sub>3</sub> | 510.4881                      | 510.5                      | [M+H] <sup>+</sup>   | ND                      | ND      | 0.80                       |
| 32:2                   |                        | C <sub>32</sub> H <sub>61</sub> NO <sub>3</sub> | 508.4724                      | 508.5                      | [M+H] <sup>+</sup>   | ND                      | ND      | 0.80                       |
| 34:1                   |                        | C <sub>34</sub> H <sub>67</sub> NO <sub>3</sub> | 538.5194                      | 538.5                      | [M+H] <sup>+</sup>   | ND                      | ND      | 0.85                       |
| 34:2                   |                        | C <sub>34</sub> H <sub>65</sub> NO <sub>3</sub> | 536.5037                      | 536.5                      | [M+H] <sup>+</sup>   | ND                      | ND      | 0.80                       |
| 36:0                   |                        | C <sub>36</sub> H <sub>73</sub> NO <sub>3</sub> | 568.5663                      | 568.5                      | [M+H] <sup>+</sup>   | ND                      | ND      | 0.83                       |
| 36:1                   |                        | C <sub>36</sub> H <sub>71</sub> NO <sub>3</sub> | 566.5507                      | 566.5                      | [M+H] <sup>+</sup>   | ND                      | ND      | 0.83                       |
| 38:2                   |                        | C <sub>38</sub> H <sub>73</sub> NO <sub>3</sub> | 592.5663                      | 592.6                      | [M+H] <sup>+</sup>   | ND                      | ND      | 0.81                       |
| 40:1                   |                        | C <sub>40</sub> H <sub>79</sub> NO <sub>3</sub> | 622.6133                      | 622.6                      | [M+H] <sup>+</sup>   | ND                      | ND      | 0.83                       |
| 40:2                   |                        | C <sub>40</sub> H <sub>77</sub> NO <sub>3</sub> | 620.5976                      | 620.6                      | [M+H] <sup>+</sup>   | ND                      | ND      | 0.83                       |
| 41:1                   |                        | C <sub>41</sub> H <sub>81</sub> NO <sub>3</sub> | 636.6289                      | 636.6                      | [M+H] <sup>+</sup>   | ND                      | ND      | 0.83                       |
| 41:3                   |                        | C <sub>41</sub> H <sub>77</sub> NO <sub>3</sub> | 632.5976                      | 632.6                      | [M+H] <sup>+</sup>   | ND                      | ND      | 0.83                       |
| 42:1                   |                        | C <sub>42</sub> H <sub>83</sub> NO <sub>3</sub> | 650.6446                      | 650.6                      | [M+H] <sup>+</sup>   | ND                      | ND      | 0.83                       |
| 42:2                   |                        | C <sub>42</sub> H <sub>81</sub> NO <sub>3</sub> | 648.6289                      | 648.6                      | [M+H] <sup>+</sup>   | ND                      | ND      | 0.83                       |
| 42:3                   |                        | C <sub>42</sub> H <sub>79</sub> NO <sub>3</sub> | 646.6133                      | 646.6                      | [M+H] <sup>+</sup>   | ND                      | ND      | 0.83                       |
| <b>HexCer</b>          |                        |                                                 |                               |                            |                      |                         |         |                            |
| 34:0 <sup>a</sup>      |                        | C <sub>40</sub> H <sub>79</sub> NO <sub>8</sub> | 702.5878                      | 702.5                      | [M+H] <sup>+</sup>   | 1.54 × 10 <sup>4</sup>  | 20.6    | 1.12 and 0.97 <sup>b</sup> |
| 34:1                   | 18:1/16:0              | C <sub>40</sub> H <sub>77</sub> NO <sub>8</sub> | 700.5722                      | 700.5                      | [M+H] <sup>+</sup>   | 1.73 × 10 <sup>4</sup>  | 20.1    | 1.11 and 0.98 <sup>b</sup> |
| 34:2                   | 18:1/16:1              | C <sub>40</sub> H <sub>75</sub> NO <sub>8</sub> | 698.5565                      | 698.5                      | [M+H] <sup>+</sup>   | 2.07 × 10 <sup>4</sup>  | 9.2     | 1.11 and 0.98 <sup>b</sup> |
| 36:0 <sup>a</sup>      |                        | C <sub>42</sub> H <sub>83</sub> NO <sub>8</sub> | 730.6191                      | 730.6                      | [M+H] <sup>+</sup>   | 0.91 × 10 <sup>4</sup>  | 3.0     | 1.11 and 0.97 <sup>b</sup> |
| 36:1                   | 18:1/18:0              | C <sub>42</sub> H <sub>81</sub> NO <sub>8</sub> | 728.6035                      | 728.5                      | [M+H] <sup>+</sup>   | 2.43 × 10 <sup>4</sup>  | 12.7    | 1.11 and 0.97 <sup>b</sup> |
| 36:2                   | 18:1/18:1              | C <sub>42</sub> H <sub>79</sub> NO <sub>8</sub> | 726.5878                      | 726.5                      | [M+H] <sup>+</sup>   | 1.00 × 10 <sup>4</sup>  | 4.9     | 1.11 and 0.97 <sup>b</sup> |
| 38:0 <sup>a</sup>      |                        | C <sub>44</sub> H <sub>89</sub> NO <sub>8</sub> | 758.6504                      | 758.6                      | [M+H] <sup>+</sup>   | 0.89 × 10 <sup>4</sup>  | 10.2    | 1.11 and 0.96 <sup>b</sup> |
| 38:1                   | 18:1/20:0<br>16:1/22:0 | C <sub>44</sub> H <sub>85</sub> NO <sub>8</sub> | 756.6348                      | 756.6                      | [M+H] <sup>+</sup>   | 2.69 × 10 <sup>4</sup>  | 24.3    | 1.11 and 0.97 <sup>b</sup> |

|                           |                              |                                                   |          |       |                    |                         |      |                               |
|---------------------------|------------------------------|---------------------------------------------------|----------|-------|--------------------|-------------------------|------|-------------------------------|
| 38:2                      | 18:1/20:1<br>16:1/22:1       | C <sub>44</sub> H <sub>83</sub> NO <sub>8</sub>   | 754.6191 | 754.6 | [M+H] <sup>+</sup> | 0.90 × 10 <sup>4</sup>  | 10.9 | 1.12 and<br>0.97 <sup>b</sup> |
| 40:0 <sup>a</sup>         |                              | C <sub>46</sub> H <sub>91</sub> NO <sub>8</sub>   | 786.6817 | 786.6 | [M+H] <sup>+</sup> | 1.39 × 10 <sup>4</sup>  | 5.6  | 1.11 and<br>0.96 <sup>b</sup> |
| 40:1                      | 18:1/22:0                    | C <sub>46</sub> H <sub>89</sub> NO <sub>8</sub>   | 784.6661 | 784.6 | [M+H] <sup>+</sup> | 5.37 × 10 <sup>4</sup>  | 18.9 | 1.11 and<br>0.96 <sup>b</sup> |
| 40:2                      | 18:1/22:1<br>18:2/22:0       | C <sub>46</sub> H <sub>87</sub> NO <sub>8</sub>   | 782.6504 | 782.6 | [M+H] <sup>+</sup> | 2.60 × 10 <sup>4</sup>  | 11.2 | 1.11 and<br>0.96 <sup>b</sup> |
| 41:1                      | 18:1/23:0                    | C <sub>47</sub> H <sub>91</sub> NO <sub>8</sub>   | 798.6817 | 798.6 | [M+H] <sup>+</sup> | 4.47 × 10 <sup>4</sup>  | 17.3 | 1.11 and<br>0.96 <sup>b</sup> |
| 42:0 <sup>a</sup>         |                              | C <sub>48</sub> H <sub>95</sub> NO <sub>8</sub>   | 814.7130 | 814.6 | [M+H] <sup>+</sup> | 1.66 × 10 <sup>4</sup>  | 7.5  | 1.11 and<br>0.96 <sup>b</sup> |
| 42:1                      | 18:1/24:0                    | C <sub>48</sub> H <sub>93</sub> NO <sub>8</sub>   | 812.6974 | 812.6 | [M+H] <sup>+</sup> | 4.97 × 10 <sup>4</sup>  | 22.2 | 1.11 and<br>0.96 <sup>b</sup> |
| 42:2                      | 18:1/24:1<br>18:2/24:0       | C <sub>48</sub> H <sub>91</sub> NO <sub>8</sub>   | 810.6817 | 810.6 | [M+H] <sup>+</sup> | 5.75 × 10 <sup>4</sup>  | 15.9 | 1.11 and<br>0.96 <sup>b</sup> |
| 42:3                      | 18:1/24:2<br>18:2/24:1       | C <sub>48</sub> H <sub>89</sub> NO <sub>8</sub>   | 808.6661 | 808.6 | [M+H] <sup>+</sup> | 2.03 × 10 <sup>4</sup>  | 2.7  | 1.11 and<br>0.96 <sup>b</sup> |
| <b>Hex<sub>2</sub>Cer</b> |                              |                                                   |          |       |                    |                         |      |                               |
| 32:1                      | 18:1/14:0<br>16:1/16:0       | C <sub>44</sub> H <sub>83</sub> NO <sub>13</sub>  | 834.5937 | 834.5 | [M+H] <sup>+</sup> | 3.60 × 10 <sup>4</sup>  | 14.2 | 1.50                          |
| 34:1                      | 18:1/16:0                    | C <sub>46</sub> H <sub>87</sub> NO <sub>13</sub>  | 862.6250 | 862.6 | [M+H] <sup>+</sup> | 37.10 × 10 <sup>4</sup> | 33.9 | 1.47                          |
| 34:2                      | 18:1/16:1<br>18:2/16:0       | C <sub>46</sub> H <sub>85</sub> NO <sub>13</sub>  | 860.6094 | 860.6 | [M+H] <sup>+</sup> | 3.71 × 10 <sup>4</sup>  | 8.4  | 1.47                          |
| 34:0 OH <sup>a</sup>      |                              | C <sub>46</sub> H <sub>89</sub> NO <sub>14</sub>  | 880.6356 | 880.5 | [M+H] <sup>+</sup> | 0.64 × 10 <sup>4</sup>  | 22.1 | 1.54                          |
| 34:1 OH                   | 18:1/16:0 OH<br>18:0 OH/16:1 | C <sub>46</sub> H <sub>87</sub> NO <sub>14</sub>  | 878.6199 | 878.5 | [M+H] <sup>+</sup> | 0.57 × 10 <sup>4</sup>  | 14.2 | 1.57                          |
| 36:1                      | 18:1/18:0                    | C <sub>48</sub> H <sub>91</sub> NO <sub>13</sub>  | 890.6563 | 890.6 | [M+H] <sup>+</sup> | 0.63 × 10 <sup>4</sup>  | 30.9 | 1.45                          |
| 36:2 <sup>a</sup>         |                              | C <sub>48</sub> H <sub>89</sub> NO <sub>13</sub>  | 888.6407 | 888.6 | [M+H] <sup>+</sup> | 0.50 × 10 <sup>4</sup>  | 25.7 | 1.44                          |
| 38:1                      | 18:1/20:0                    | C <sub>50</sub> H <sub>95</sub> NO <sub>13</sub>  | 918.6876 | 918.6 | [M+H] <sup>+</sup> | 0.44 × 10 <sup>4</sup>  | 32.4 | 1.42                          |
| 38:2                      | 18:1/20:1                    | C <sub>50</sub> H <sub>93</sub> NO <sub>13</sub>  | 916.6720 | 916.6 | [M+H] <sup>+</sup> | 0.21 × 10 <sup>4</sup>  | 28.2 | 1.43                          |
| 40:1                      | 18:1/22:0                    | C <sub>52</sub> H <sub>99</sub> NO <sub>13</sub>  | 946.7189 | 946.7 | [M+H] <sup>+</sup> | 1.00 × 10 <sup>4</sup>  | 36.8 | 1.40                          |
| 40:2                      | 18:1/22:1<br>18:2/22:0       | C <sub>52</sub> H <sub>97</sub> NO <sub>13</sub>  | 944.7033 | 944.7 | [M+H] <sup>+</sup> | 0.72 × 10 <sup>4</sup>  | 24.2 | 1.40                          |
| 40:3                      | 18:1/22:2                    | C <sub>52</sub> H <sub>95</sub> NO <sub>13</sub>  | 942.6876 | 942.7 | [M+H] <sup>+</sup> | 0.15 × 10 <sup>4</sup>  | 8.4  | 1.41                          |
| 42:1                      |                              | C <sub>54</sub> H <sub>103</sub> NO <sub>13</sub> | 974.7502 | 974.7 | [M+H] <sup>+</sup> | 1.58 × 10 <sup>4</sup>  | 34.5 | 1.38                          |
| 42:2                      |                              | C <sub>54</sub> H <sub>101</sub> NO <sub>13</sub> | 972.7346 | 972.7 | [M+H] <sup>+</sup> | 4.55 × 10 <sup>4</sup>  | 28.6 | 1.38                          |
| 42:3                      |                              | C <sub>54</sub> H <sub>99</sub> NO <sub>13</sub>  | 970.7189 | 970.6 | [M+H] <sup>+</sup> | 1.65 × 10 <sup>4</sup>  | 7.0  | 1.39                          |
| <b>Gb<sub>3</sub></b>     |                              |                                                   |          |       |                    |                         |      |                               |

|                                           |           |                                                                                                                                    |                        |        |                    |                        |      |                               |
|-------------------------------------------|-----------|------------------------------------------------------------------------------------------------------------------------------------|------------------------|--------|--------------------|------------------------|------|-------------------------------|
| 32:1                                      |           | C <sub>50</sub> H <sub>93</sub> NO <sub>18</sub>                                                                                   | 996.6465               | 996.6  | [M+H] <sup>+</sup> | 0.45 × 10 <sup>4</sup> | 21.9 | 2.62                          |
| 34:1                                      | 18:1/16:0 | C <sub>52</sub> H <sub>97</sub> NO <sub>18</sub>                                                                                   | 1024.6778              | 1024.6 | [M+H] <sup>+</sup> | 8.42 × 10 <sup>4</sup> | 29.7 | 2.56                          |
| 34:2                                      |           | C <sub>52</sub> H <sub>95</sub> NO <sub>18</sub>                                                                                   | 1022.6622              | 1022.6 | [M+H] <sup>+</sup> | 0.71 × 10 <sup>4</sup> | 1.4  | 2.57                          |
| 34:0 OH                                   |           | C <sub>52</sub> H <sub>99</sub> NO <sub>19</sub>                                                                                   | 1042.6884              | 1042.6 | [M+H] <sup>+</sup> | 0.20 × 10 <sup>4</sup> | 39.5 | 2.62                          |
| 34:1 OH <sup>a</sup><br>35:0 <sup>a</sup> |           | C <sub>52</sub> H <sub>97</sub> NO <sub>19</sub><br>C <sub>53</sub> H <sub>101</sub> NO <sub>18</sub>                              | 1040.6728<br>1040.7091 | 1040.6 | [M+H] <sup>+</sup> | 0.13 × 10 <sup>4</sup> | 24.5 | 2.72                          |
| 34:2 OH<br>35:1                           |           | C <sub>52</sub> H <sub>95</sub> NO <sub>19</sub><br>C <sub>53</sub> H <sub>99</sub> NO <sub>18</sub>                               | 1038.6571<br>1038.6935 | 1038.6 | [M+H] <sup>+</sup> | 1.30 × 10 <sup>4</sup> | 21.8 | 2.51                          |
| 36:1                                      |           | C <sub>54</sub> H <sub>101</sub> NO <sub>18</sub>                                                                                  | 1052.7091              | 1052.7 | [M+H] <sup>+</sup> | 0.76 × 10 <sup>4</sup> | 21.8 | 2.48                          |
| 36:2                                      |           | C <sub>54</sub> H <sub>99</sub> NO <sub>18</sub>                                                                                   | 1050.6935              | 1050.7 | [M+H] <sup>+</sup> | 0.27 × 10 <sup>4</sup> | 22.4 | 2.49                          |
| 38:1                                      |           | C <sub>56</sub> H <sub>105</sub> NO <sub>18</sub>                                                                                  | 1080.7404              | 1080.7 | [M+H] <sup>+</sup> | 0.39 × 10 <sup>4</sup> | 28.8 | 2.43                          |
| 38:2                                      |           | C <sub>56</sub> H <sub>103</sub> NO <sub>18</sub>                                                                                  | 1078.7248              | 1078.7 | [M+H] <sup>+</sup> | 0.13 × 10 <sup>4</sup> | 27.9 | 2.44                          |
| 40:1                                      |           | C <sub>58</sub> H <sub>109</sub> NO <sub>18</sub>                                                                                  | 1108.7717              | 1108.7 | [M+H] <sup>+</sup> | 0.92 × 10 <sup>4</sup> | 20.3 | 2.37                          |
| 40:2                                      |           | C <sub>58</sub> H <sub>107</sub> NO <sub>18</sub>                                                                                  | 1106.7561              | 1106.7 | [M+H] <sup>+</sup> | 0.61 × 10 <sup>4</sup> | 27.1 | 2.37                          |
| 40:3                                      |           | C <sub>58</sub> H <sub>105</sub> NO <sub>18</sub>                                                                                  | 1104.7404              | 1104.7 | [M+H] <sup>+</sup> | 0.11 × 10 <sup>4</sup> | 16.1 | 2.42                          |
| 42:1                                      |           | C <sub>60</sub> H <sub>113</sub> NO <sub>18</sub>                                                                                  | 1136.8030              | 1136.7 | [M+H] <sup>+</sup> | 0.88 × 10 <sup>4</sup> | 19.3 | 2.33                          |
| 42:2                                      |           | C <sub>60</sub> H <sub>111</sub> NO <sub>18</sub>                                                                                  | 1134.7874              | 1134.7 | [M+H] <sup>+</sup> | 1.65 × 10 <sup>4</sup> | 24.0 | 2.33                          |
| 42:3                                      |           | C <sub>60</sub> H <sub>109</sub> NO <sub>18</sub>                                                                                  | 1132.7717              | 1132.7 | [M+H] <sup>+</sup> | 0.66 × 10 <sup>4</sup> | 9.8  | 2.36                          |
| <b>Gb<sub>4</sub></b>                     |           |                                                                                                                                    |                        |        |                    |                        |      |                               |
| 32:1                                      |           | C <sub>58</sub> H <sub>106</sub> N <sub>2</sub> O <sub>23</sub>                                                                    | 1199.7259              | 1199.6 | [M+H] <sup>+</sup> | 0.22 × 10 <sup>4</sup> | 24.5 | 7.06 and<br>7.64 <sup>c</sup> |
| 33:1 <sup>a</sup>                         |           | C <sub>59</sub> H <sub>108</sub> N <sub>2</sub> O <sub>23</sub>                                                                    | 1213.7416              | 1213.7 | [M+H] <sup>+</sup> | 0.08 × 10 <sup>4</sup> | 34.3 | 6.95 and<br>7.58 <sup>c</sup> |
| 34:1                                      | 18:1/16:0 | C <sub>60</sub> H <sub>110</sub> N <sub>2</sub> O <sub>23</sub>                                                                    | 1227.7572              | 1227.7 | [M+H] <sup>+</sup> | 3.26 × 10 <sup>4</sup> | 37.8 | 6.85 and<br>7.47 <sup>c</sup> |
| 34:2                                      |           | C <sub>60</sub> H <sub>108</sub> N <sub>2</sub> O <sub>23</sub>                                                                    | 1225.7416              | 1225.7 | [M+H] <sup>+</sup> | 0.34 × 10 <sup>4</sup> | 9.6  | 6.91 and<br>7.48 <sup>c</sup> |
| 34:1 OH <sup>a</sup><br>35:0 <sup>a</sup> |           | C <sub>60</sub> H <sub>110</sub> N <sub>2</sub> O <sub>24</sub><br>C <sub>61</sub> H <sub>114</sub> N <sub>2</sub> O <sub>23</sub> | 1243.7521<br>1243.7885 | 1243.7 | [M+H] <sup>+</sup> | 0.08 × 10 <sup>4</sup> | 22.7 | 6.87 and<br>7.39 <sup>c</sup> |
| 34:2 OH <sup>a</sup><br>35:1 <sup>a</sup> |           | C <sub>60</sub> H <sub>108</sub> N <sub>2</sub> O <sub>24</sub><br>C <sub>61</sub> H <sub>112</sub> N <sub>2</sub> O <sub>23</sub> | 1241.7365<br>1241.7729 | 1241.7 | [M+H] <sup>+</sup> | 0.05 × 10 <sup>4</sup> | 34.3 | 6.75 and<br>7.48 <sup>c</sup> |
| 36:1                                      |           | C <sub>62</sub> H <sub>114</sub> N <sub>2</sub> O <sub>23</sub>                                                                    | 1255.7885              | 1255.8 | [M+H] <sup>+</sup> | 0.21 × 10 <sup>4</sup> | 32.0 | 6.65                          |
| 36:2 <sup>a</sup>                         |           | C <sub>62</sub> H <sub>112</sub> N <sub>2</sub> O <sub>23</sub>                                                                    | 1253.7729              | 1253.8 | [M+H] <sup>+</sup> | 0.10 × 10 <sup>4</sup> | 21.9 | 6.69                          |
| 38:1                                      |           | C <sub>64</sub> H <sub>118</sub> N <sub>2</sub> O <sub>23</sub>                                                                    | 1283.8198              | 1283.8 | [M+H] <sup>+</sup> | 0.10 × 10 <sup>4</sup> | 25.7 | 6.43                          |
| 38:2 <sup>a</sup>                         |           | C <sub>64</sub> H <sub>116</sub> N <sub>2</sub> O <sub>23</sub>                                                                    | 1281.8042              | 1281.8 | [M+H] <sup>+</sup> | 0.06 × 10 <sup>4</sup> | 21.3 | 6.52                          |
| 40:1                                      |           | C <sub>66</sub> H <sub>122</sub> N <sub>2</sub> O <sub>23</sub>                                                                    | 1311.8511              | 1311.8 | [M+H] <sup>+</sup> | 0.14 × 10 <sup>4</sup> | 20.0 | 6.30                          |
| 40:2                                      |           | C <sub>66</sub> H <sub>120</sub> N <sub>2</sub> O <sub>23</sub>                                                                    | 1309.8355              | 1309.8 | [M+H] <sup>+</sup> | 0.11 × 10 <sup>4</sup> | 13.6 | 6.31                          |
| 40:3 <sup>a</sup>                         |           | C <sub>66</sub> H <sub>118</sub> N <sub>2</sub> O <sub>23</sub>                                                                    | 1307.8198              | 1307.8 | [M+H] <sup>+</sup> | 0.07 × 10 <sup>4</sup> | 18.4 | 6.32                          |
| 42:1                                      |           | C <sub>68</sub> H <sub>126</sub> N <sub>2</sub> O <sub>23</sub>                                                                    | 1339.8824              | 1339.8 | [M+H] <sup>+</sup> | 0.13 × 10 <sup>4</sup> | 16.9 | 6.20                          |

|                      |                              |                                                                 |           |        |                    |                        |      |      |
|----------------------|------------------------------|-----------------------------------------------------------------|-----------|--------|--------------------|------------------------|------|------|
| 42:2                 |                              | C <sub>68</sub> H <sub>124</sub> N <sub>2</sub> O <sub>23</sub> | 1337.8668 | 1337.8 | [M+H] <sup>+</sup> | 0.27 × 10 <sup>4</sup> | 17.1 | 6.23 |
| 42:3                 |                              | C <sub>68</sub> H <sub>122</sub> N <sub>2</sub> O <sub>23</sub> | 1335.8511 | 1338.5 | [M+H] <sup>+</sup> | 0.12 × 10 <sup>4</sup> | 3.9  | 6.25 |
| <b>SHexCer</b>       |                              |                                                                 |           |        |                    |                        |      |      |
| 32:1 OH              | 16:1/16:0 OH<br>18:1/14:0 OH | C <sub>38</sub> H <sub>73</sub> NO <sub>12</sub> S              | 766.4781  | 766.4  | [M-H] <sup>-</sup> | 0.50 × 10 <sup>5</sup> | 9.9  | 0.55 |
| 34:1                 | 18:1/16:0                    | C <sub>40</sub> H <sub>77</sub> NO <sub>11</sub> S              | 778.5145  | 778.5  | [M-H] <sup>-</sup> | 3.77 × 10 <sup>5</sup> | 26.1 | 0.54 |
| 34:2                 | 18:2/16:0                    | C <sub>40</sub> H <sub>75</sub> NO <sub>11</sub> S              | 776.4988  | 776.5  | [M-H] <sup>-</sup> | 0.49 × 10 <sup>5</sup> | 21.1 | 0.54 |
| 34:0 OH              | 18:0/16:0 OH                 | C <sub>40</sub> H <sub>79</sub> NO <sub>12</sub> S              | 796.5250  | 796.5  | [M-H] <sup>-</sup> | 2.07 × 10 <sup>5</sup> | 20.5 | 0.55 |
| 34:0 2OH             | 18:0 OH/16:0 OH              | C <sub>40</sub> H <sub>79</sub> NO <sub>13</sub> S              | 812.5199  | 812.4  | [M-H] <sup>-</sup> | 0.98 × 10 <sup>5</sup> | 14.3 | 0.55 |
| 34:1 OH              | 18:1/16:0 OH                 | C <sub>40</sub> H <sub>77</sub> NO <sub>12</sub> S              | 794.5094  | 794.4  | [M-H] <sup>-</sup> | 8.09 × 10 <sup>5</sup> | 21.0 | 0.55 |
| 34:2 OH              | 18:2/16:0 OH                 | C <sub>40</sub> H <sub>75</sub> NO <sub>12</sub> S              | 792.4937  | 792.5  | [M-H] <sup>-</sup> | 0.98 × 10 <sup>5</sup> | 10.9 | 0.55 |
| 36:1                 | 18:1/18:0                    | C <sub>42</sub> H <sub>81</sub> NO <sub>11</sub> S              | 806.5458  | 806.5  | [M-H] <sup>-</sup> | 0.17 × 10 <sup>5</sup> | 30.7 | 0.54 |
| 36:2                 | 18:2/18:0<br>18:1/18:1       | C <sub>42</sub> H <sub>79</sub> NO <sub>11</sub> S              | 804.5301  | 804.5  | [M-H] <sup>-</sup> | 0.13 × 10 <sup>5</sup> | 21.7 | 0.55 |
| 36:1 OH              | 18:1/18:0 OH                 | C <sub>42</sub> H <sub>81</sub> NO <sub>12</sub> S              | 822.5407  | 822.5  | [M-H] <sup>-</sup> | 0.31 × 10 <sup>5</sup> | 27.6 | 0.55 |
| 36:2 OH              | 18:1/18:1 OH<br>18:2/18:0 OH | C <sub>42</sub> H <sub>79</sub> NO <sub>12</sub> S              | 820.5250  | 820.5  | [M-H] <sup>-</sup> | 0.16 × 10 <sup>5</sup> | 2.2  | 0.54 |
| 38:1                 | 18:1/20:0                    | C <sub>44</sub> H <sub>85</sub> NO <sub>11</sub> S              | 834.5771  | 834.5  | [M-H] <sup>-</sup> | 0.31 × 10 <sup>5</sup> | 19.7 | 0.54 |
| 38:2                 | 18:2/20:0                    | C <sub>44</sub> H <sub>83</sub> NO <sub>11</sub> S              | 832.5614  | 832.5  | [M-H] <sup>-</sup> | 0.14 × 10 <sup>5</sup> | 18.7 | 0.54 |
| 38:1 OH              | 18:1/20:0 OH<br>16:1/22:0 OH | C <sub>44</sub> H <sub>85</sub> NO <sub>12</sub> S              | 850.5720  | 850.5  | [M-H] <sup>-</sup> | 0.32 × 10 <sup>5</sup> | 14.6 | 0.54 |
| 38:2 OH              | 18:1/20:1 OH<br>18:2/20:0 OH | C <sub>44</sub> H <sub>83</sub> NO <sub>12</sub> S              | 848.5563  | 848.5  | [M-H] <sup>-</sup> | 0.16 × 10 <sup>5</sup> | 17.8 | 0.54 |
| 39:1 OH              | 16:1/23:0 OH<br>18:1/21:0 OH | C <sub>45</sub> H <sub>87</sub> NO <sub>12</sub> S              | 864.5876  | 864.5  | [M-H] <sup>-</sup> | 0.44 × 10 <sup>5</sup> | 12.3 | 0.54 |
| 40:1                 | 18:1/22:0                    | C <sub>46</sub> H <sub>89</sub> NO <sub>11</sub> S              | 862.6084  | 862.5  | [M-H] <sup>-</sup> | 0.79 × 10 <sup>5</sup> | 11.7 | 0.54 |
| 40:2                 | 18:2/22:0                    | C <sub>46</sub> H <sub>87</sub> NO <sub>11</sub> S              | 860.5927  | 860.5  | [M-H] <sup>-</sup> | 0.47 × 10 <sup>5</sup> | 21.8 | 0.54 |
| 40:0 OH <sup>a</sup> |                              | C <sub>46</sub> H <sub>91</sub> NO <sub>12</sub> S              | 880.6189  | 880.6  | [M-H] <sup>-</sup> | 0.61 × 10 <sup>5</sup> | 5.8  | 0.54 |
| 40:0 2OH             | 18:0 OH/22:0 OH              | C <sub>46</sub> H <sub>91</sub> NO <sub>13</sub> S              | 896.6138  | 896.6  | [M-H] <sup>-</sup> | 0.40 × 10 <sup>5</sup> | 13.2 | 0.54 |
| 40:1 OH              | 18:1/22:0 OH                 | C <sub>46</sub> H <sub>89</sub> NO <sub>12</sub> S              | 878.6033  | 878.5  | [M-H] <sup>-</sup> | 1.90 × 10 <sup>5</sup> | 7.5  | 0.54 |
| 40:2 OH              | 18:2/22:0 OH<br>18:1/22:1 OH | C <sub>46</sub> H <sub>87</sub> NO <sub>12</sub> S              | 876.5876  | 876.5  | [M-H] <sup>-</sup> | 1.09 × 10 <sup>5</sup> | 20.1 | 0.54 |
| 41:2 <sup>a</sup>    |                              | C <sub>47</sub> H <sub>89</sub> NO <sub>11</sub> S              | 874.6084  | 874.5  | [M-H] <sup>-</sup> | 0.31 × 10 <sup>5</sup> | 33.0 | 0.54 |
| 41:0 OH <sup>a</sup> |                              | C <sub>47</sub> H <sub>93</sub> NO <sub>12</sub> S              | 894.6346  | 894.6  | [M-H] <sup>-</sup> | 0.66 × 10 <sup>5</sup> | 6.1  | 0.54 |
| 41:1 OH              | 18:1/23:0 OH                 | C <sub>47</sub> H <sub>91</sub> NO <sub>12</sub> S              | 892.6189  | 892.6  | [M-H] <sup>-</sup> | 1.72 × 10 <sup>5</sup> | 8.8  | 0.54 |
| 41:2 OH              | 18:2/23:0 OH<br>18:1/23:1 OH | C <sub>47</sub> H <sub>89</sub> NO <sub>12</sub> S              | 890.6033  | 890.5  | [M-H] <sup>-</sup> | 1.35 × 10 <sup>5</sup> | 19.7 | 0.54 |
| 42:2                 | 18:1/24:1<br>18:2/24:0       | C <sub>48</sub> H <sub>91</sub> NO <sub>11</sub> S              | 888.6240  | 888.6  | [M-H] <sup>-</sup> | 1.27 × 10 <sup>5</sup> | 27.1 | 0.54 |



|                                        |                              |                                                                 |           |        |                    |                        |      |      |
|----------------------------------------|------------------------------|-----------------------------------------------------------------|-----------|--------|--------------------|------------------------|------|------|
| 42:0 OH <sup>a</sup>                   |                              | C <sub>48</sub> H <sub>95</sub> NO <sub>12</sub> S              | 908.6502  | 908.6  | [M-H] <sup>-</sup> | 0.79 × 10 <sup>5</sup> | 12.7 | 0.54 |
| 42:1 OH                                | 18:1/24:0 OH                 | C <sub>48</sub> H <sub>93</sub> NO <sub>12</sub> S              | 906.6346  | 906.6  | [M-H] <sup>-</sup> | 2.72 × 10 <sup>5</sup> | 12.3 | 0.54 |
| 42:1 2OH                               | 18:0 OH/24:1 OH              | C <sub>48</sub> H <sub>93</sub> NO <sub>13</sub> S              | 922.6295  | 922.6  | [M-H] <sup>-</sup> | 1.02 × 10 <sup>5</sup> | 14.8 | 0.55 |
| 42:2 OH                                | 18:1/24:1 OH<br>18:2/24:0 OH | C <sub>48</sub> H <sub>91</sub> NO <sub>12</sub> S              | 904.6189  | 904.6  | [M-H] <sup>-</sup> | 2.90 × 10 <sup>5</sup> | 19.6 | 0.54 |
| 42:3 OH                                | 18:1/24:2 OH<br>18:2/24:1 OH | C <sub>48</sub> H <sub>89</sub> NO <sub>12</sub> S              | 902.6033  | 902.6  | [M-H] <sup>-</sup> | 0.63 × 10 <sup>5</sup> | 5.1  | 0.54 |
| <b>SHex<sub>2</sub>Cer<sup>a</sup></b> |                              |                                                                 |           |        |                    |                        |      |      |
| 34:1                                   |                              | C <sub>46</sub> H <sub>87</sub> NO <sub>16</sub> S              | 940.5673  | 940.5  | [M-H] <sup>-</sup> | 0.21 × 10 <sup>5</sup> | 32.3 | 0.57 |
| 34:1 OH                                |                              | C <sub>46</sub> H <sub>87</sub> NO <sub>17</sub> S              | 956.5622  | 956.6  | [M-H] <sup>-</sup> | 0.10 × 10 <sup>5</sup> | 25.5 | 0.58 |
| 35:0                                   |                              | C <sub>47</sub> H <sub>91</sub> NO <sub>16</sub> S              | 956.5986  |        |                    |                        |      |      |
| 36:1                                   |                              | C <sub>48</sub> H <sub>91</sub> NO <sub>16</sub> S              | 968.5986  | 968.5  | [M-H] <sup>-</sup> | 0.08 × 10 <sup>5</sup> | 5.7  | 0.57 |
| 36:1 OH                                |                              | C <sub>48</sub> H <sub>91</sub> NO <sub>17</sub> S              | 984.5935  | 984.5  | [M-H] <sup>-</sup> | 0.07 × 10 <sup>5</sup> | 26.6 | 0.55 |
| 37:0                                   |                              | C <sub>49</sub> H <sub>95</sub> NO <sub>16</sub> S              | 984.6299  |        |                    |                        |      |      |
| 38:1                                   |                              | C <sub>50</sub> H <sub>95</sub> NO <sub>16</sub> S              | 996.6299  | 996.6  | [M-H] <sup>-</sup> | 0.08 × 10 <sup>5</sup> | 47.5 | 0.57 |
| 38:1 OH                                |                              | C <sub>50</sub> H <sub>95</sub> NO <sub>17</sub> S              | 1012.6248 | 1012.6 | [M-H] <sup>-</sup> | 0.07 × 10 <sup>5</sup> | 31.4 | 0.57 |
| 39:0                                   |                              | C <sub>51</sub> H <sub>99</sub> NO <sub>16</sub> S              | 1012.6612 |        |                    |                        |      |      |
| 40:1                                   |                              | C <sub>52</sub> H <sub>99</sub> NO <sub>16</sub> S              | 1024.6612 | 1024.6 | [M-H] <sup>-</sup> | 0.16 × 10 <sup>5</sup> | 24.3 | 0.57 |
| 40:1 OH                                |                              | C <sub>52</sub> H <sub>99</sub> NO <sub>17</sub> S              | 1040.6561 | 1040.6 | [M-H] <sup>-</sup> | 0.11 × 10 <sup>5</sup> | 39.6 | 0.57 |
| 41:0                                   |                              | C <sub>53</sub> H <sub>103</sub> NO <sub>16</sub> S             | 1040.6925 |        |                    |                        |      |      |
| 40:2 OH                                |                              | C <sub>52</sub> H <sub>97</sub> NO <sub>17</sub> S              | 1038.6404 | 1038.6 | [M-H] <sup>-</sup> | 0.12 × 10 <sup>5</sup> | 20.7 | 0.57 |
| 41:1                                   |                              | C <sub>53</sub> H <sub>101</sub> NO <sub>16</sub> S             | 1038.6768 |        |                    |                        |      |      |
| 42:1                                   |                              | C <sub>54</sub> H <sub>103</sub> NO <sub>16</sub> S             | 1052.6925 | 1052.7 | [M-H] <sup>-</sup> | 0.19 × 10 <sup>5</sup> | 33.9 | 0.56 |
| 42:2                                   |                              | C <sub>54</sub> H <sub>101</sub> NO <sub>16</sub> S             | 1050.6768 | 1050.6 | [M-H] <sup>-</sup> | 0.20 × 10 <sup>5</sup> | 15.6 | 0.57 |
| 42:1 OH                                |                              | C <sub>54</sub> H <sub>103</sub> NO <sub>17</sub> S             | 1068.6874 | 1068.7 | [M-H] <sup>-</sup> | 0.11 × 10 <sup>5</sup> | 18.9 | 0.57 |
| 43:0                                   |                              | C <sub>55</sub> H <sub>107</sub> NO <sub>16</sub> S             | 1068.7238 |        |                    |                        |      |      |
| 42:2 OH                                |                              | C <sub>54</sub> H <sub>101</sub> NO <sub>17</sub> S             | 1066.6717 | 1066.6 | [M-H] <sup>-</sup> | 0.11 × 10 <sup>5</sup> | 18.5 | 0.57 |
| 43:1                                   |                              | C <sub>55</sub> H <sub>105</sub> NO <sub>16</sub> S             | 1066.7081 |        |                    |                        |      |      |
| <b>GM<sub>3</sub></b>                  |                              |                                                                 |           |        |                    |                        |      |      |
| 30:1                                   |                              | C <sub>53</sub> H <sub>96</sub> N <sub>2</sub> O <sub>21</sub>  | 1095.6433 | 1095.6 | [M-H] <sup>-</sup> | 0.11 × 10 <sup>5</sup> | 12.7 | 2.55 |
| 32:1                                   |                              | C <sub>55</sub> H <sub>100</sub> N <sub>2</sub> O <sub>21</sub> | 1123.6746 | 1123.7 | [M-H] <sup>-</sup> | 0.48 × 10 <sup>5</sup> | 8.19 | 2.46 |
| 34:1                                   |                              | C <sub>57</sub> H <sub>104</sub> N <sub>2</sub> O <sub>21</sub> | 1151.7059 | 1151.7 | [M-H] <sup>-</sup> | 4.72 × 10 <sup>5</sup> | 24.3 | 2.40 |
| 34:2                                   |                              | C <sub>57</sub> H <sub>102</sub> N <sub>2</sub> O <sub>21</sub> | 1149.6902 | 1149.7 | [M-H] <sup>-</sup> | 0.49 × 10 <sup>5</sup> | 16.2 | 2.40 |
| 34:1 OH                                |                              | C <sub>57</sub> H <sub>104</sub> N <sub>2</sub> O <sub>22</sub> | 1167.7008 | 1167.7 | [M-H] <sup>-</sup> | 0.68 × 10 <sup>5</sup> | 30.2 | 2.37 |
| 34:2 OH                                |                              | C <sub>57</sub> H <sub>102</sub> N <sub>2</sub> O <sub>22</sub> | 1165.6852 | 1165.7 | [M-H] <sup>-</sup> | 0.52 × 10 <sup>5</sup> | 26.9 | 2.36 |
| 36:1                                   |                              | C <sub>59</sub> H <sub>108</sub> N <sub>2</sub> O <sub>21</sub> | 1179.7372 | 1179.8 | [M-H] <sup>-</sup> | 3.04 × 10 <sup>5</sup> | 28.3 | 2.33 |
| 36:2                                   |                              | C <sub>59</sub> H <sub>106</sub> N <sub>2</sub> O <sub>21</sub> | 1177.7215 | 1177.8 | [M-H] <sup>-</sup> | 0.51 × 10 <sup>5</sup> | 3.3  | 2.35 |
| 36:1 OH                                |                              | C <sub>59</sub> H <sub>108</sub> N <sub>2</sub> O <sub>22</sub> | 1195.7321 | 1195.8 | [M-H] <sup>-</sup> | 0.35 × 10 <sup>5</sup> | 24.3 | 2.32 |

|           |                                     |                                                                 |           |        |                    |                         |      |      |
|-----------|-------------------------------------|-----------------------------------------------------------------|-----------|--------|--------------------|-------------------------|------|------|
| 36:2 OH   |                                     | C <sub>59</sub> H <sub>106</sub> N <sub>2</sub> O <sub>22</sub> | 1193.7165 | 1193.8 | [M-H] <sup>-</sup> | 0.49 × 10 <sup>5</sup>  | 28.5 | 2.32 |
| 38:1      |                                     | C <sub>61</sub> H <sub>112</sub> N <sub>2</sub> O <sub>21</sub> | 1207.7685 | 1207.8 | [M-H] <sup>-</sup> | 1.53 × 10 <sup>5</sup>  | 29.3 | 2.26 |
| 38:2      |                                     | C <sub>61</sub> H <sub>110</sub> N <sub>2</sub> O <sub>21</sub> | 1205.7528 | 1205.8 | [M-H] <sup>-</sup> | 0.33 × 10 <sup>5</sup>  | 3.5  | 2.28 |
| 38:1 OH   |                                     | C <sub>61</sub> H <sub>112</sub> N <sub>2</sub> O <sub>22</sub> | 1223.7634 | 1223.8 | [M-H] <sup>-</sup> | 0.42 × 10 <sup>5</sup>  | 36.6 | 2.26 |
| 38:2 OH   |                                     | C <sub>61</sub> H <sub>110</sub> N <sub>2</sub> O <sub>22</sub> | 1221.7478 | 1221.8 | [M-H] <sup>-</sup> | 0.62 × 10 <sup>5</sup>  | 30.1 | 2.26 |
| 40:1      |                                     | C <sub>63</sub> H <sub>116</sub> N <sub>2</sub> O <sub>21</sub> | 1235.7998 | 1235.8 | [M-H] <sup>-</sup> | 2.65 × 10 <sup>5</sup>  | 21.3 | 2.21 |
| 40:2      |                                     | C <sub>63</sub> H <sub>114</sub> N <sub>2</sub> O <sub>21</sub> | 1233.7841 | 1233.8 | [M-H] <sup>-</sup> | 1.07 × 10 <sup>5</sup>  | 9.0  | 2.22 |
| 40:1 OH   |                                     | C <sub>63</sub> H <sub>116</sub> N <sub>2</sub> O <sub>22</sub> | 1251.7947 | 1251.8 | [M-H] <sup>-</sup> | 0.93 × 10 <sup>5</sup>  | 21.5 | 2.19 |
| 40:2 OH   |                                     | C <sub>63</sub> H <sub>114</sub> N <sub>2</sub> O <sub>22</sub> | 1249.7791 | 1249.8 | [M-H] <sup>-</sup> | 1.40 × 10 <sup>5</sup>  | 20.3 | 2.19 |
| 40:3 OH   |                                     | C <sub>63</sub> H <sub>112</sub> N <sub>2</sub> O <sub>22</sub> | 1247.7634 | 1247.8 | [M-H] <sup>-</sup> | 0.52 × 10 <sup>5</sup>  | 13.3 | 2.20 |
| 42:1      |                                     | C <sub>65</sub> H <sub>120</sub> N <sub>2</sub> O <sub>21</sub> | 1263.8311 | 1263.8 | [M-H] <sup>-</sup> | 2.16 × 10 <sup>5</sup>  | 19.2 | 2.17 |
| 42:2      |                                     | C <sub>65</sub> H <sub>118</sub> N <sub>2</sub> O <sub>21</sub> | 1261.8154 | 1261.8 | [M-H] <sup>-</sup> | 2.59 × 10 <sup>5</sup>  | 15.2 | 2.17 |
| 42:3      |                                     | C <sub>65</sub> H <sub>116</sub> N <sub>2</sub> O <sub>21</sub> | 1259.7998 | 1259.8 | [M-H] <sup>-</sup> | 0.73 × 10 <sup>5</sup>  | 11.0 | 2.20 |
| 42:1 OH   |                                     | C <sub>65</sub> H <sub>120</sub> N <sub>2</sub> O <sub>22</sub> | 1279.8260 | 1279.8 | [M-H] <sup>-</sup> | 1.07 × 10 <sup>5</sup>  | 20.7 | 2.34 |
| 42:2 OH   |                                     | C <sub>65</sub> H <sub>118</sub> N <sub>2</sub> O <sub>22</sub> | 1277.8103 | 1277.9 | [M-H] <sup>-</sup> | 1.05 × 10 <sup>5</sup>  | 21.4 | 2.35 |
| 42:3 OH   |                                     | C <sub>65</sub> H <sub>116</sub> N <sub>2</sub> O <sub>22</sub> | 1275.7947 | 1275.8 | [M-H] <sup>-</sup> | 0.31 × 10 <sup>5</sup>  | 0.7  | 2.36 |
| <b>PI</b> |                                     |                                                                 |           |        |                    |                         |      |      |
| 32:0      | 16:0/16:0                           | C <sub>41</sub> H <sub>79</sub> O <sub>13</sub> P               | 809.5186  | 809.5  | [M-H] <sup>-</sup> | 0.16 × 10 <sup>6</sup>  | 22.4 | 1.25 |
| 32:1      | 16:0/16:1                           | C <sub>41</sub> H <sub>77</sub> O <sub>13</sub> P               | 807.5029  | 807.5  | [M-H] <sup>-</sup> | 0.23 × 10 <sup>6</sup>  | 5.4  | 1.24 |
| 34:1      | 16:0/18:1<br>18:0/16:1              | C <sub>43</sub> H <sub>81</sub> O <sub>13</sub> P               | 835.5342  | 835.6  | [M-H] <sup>-</sup> | 1.86 × 10 <sup>6</sup>  | 9.2  | 1.22 |
| 34:2      | 16:0/18:2                           | C <sub>43</sub> H <sub>79</sub> O <sub>13</sub> P               | 833.5186  | 833.6  | [M-H] <sup>-</sup> | 1.02 × 10 <sup>6</sup>  | 5.1  | 1.22 |
| 35:1      | 17:0/18:1                           | C <sub>44</sub> H <sub>83</sub> O <sub>13</sub> P               | 849.5499  | 849.6  | [M-H] <sup>-</sup> | 0.09 × 10 <sup>6</sup>  | 10.9 | 1.21 |
| 35:2      | 17:0/18:2                           | C <sub>44</sub> H <sub>81</sub> O <sub>13</sub> P               | 847.5342  | 847.6  | [M-H] <sup>-</sup> | 0.07 × 10 <sup>6</sup>  | 4.4  | 1.21 |
| 36:1      | 18:0/18:1                           | C <sub>44</sub> H <sub>85</sub> O <sub>13</sub> P               | 863.5655  | 863.5  | [M-H] <sup>-</sup> | 1.77 × 10 <sup>6</sup>  | 18.1 | 1.21 |
| 36:2      | 18:0/18:2<br>18:1/18:1              | C <sub>45</sub> H <sub>83</sub> O <sub>13</sub> P               | 861.5499  | 861.6  | [M-H] <sup>-</sup> | 3.01 × 10 <sup>6</sup>  | 11.1 | 1.21 |
| 36:3      | 16:0/20:3<br>18:1/18:2              | C <sub>45</sub> H <sub>81</sub> O <sub>13</sub> P               | 859.5342  | 859.5  | [M-H] <sup>-</sup> | 0.66 × 10 <sup>6</sup>  | 6.6  | 1.20 |
| 36:4      | 16:0/20:4                           | C <sub>45</sub> H <sub>79</sub> O <sub>13</sub> P               | 857.5186  | 857.6  | [M-H] <sup>-</sup> | 1.31 × 10 <sup>6</sup>  | 7.6  | 1.19 |
| 38:3      | 18:0/20:3                           | C <sub>47</sub> H <sub>85</sub> O <sub>13</sub> P               | 887.5655  | 887.6  | [M-H] <sup>-</sup> | 4.19 × 10 <sup>6</sup>  | 14.6 | 1.18 |
| 38:4      | 18:0/20:4                           | C <sub>47</sub> H <sub>83</sub> O <sub>13</sub> P               | 885.5499  | 885.6  | [M-H] <sup>-</sup> | 14.23 × 10 <sup>6</sup> | 11.6 | 1.17 |
| 38:5      | 18:1/20:4<br>18:0/20:5<br>16:0/22:5 | C <sub>47</sub> H <sub>81</sub> O <sub>13</sub> P               | 883.5342  | 883.5  | [M-H] <sup>-</sup> | 0.51 × 10 <sup>6</sup>  | 8.5  | 1.18 |
| 38:6      | 16:0/22:6                           | C <sub>47</sub> H <sub>79</sub> O <sub>13</sub> P               | 881.5186  | 881.5  | [M-H] <sup>-</sup> | 0.21 × 10 <sup>6</sup>  | 15.0 | 1.18 |
| 40:4      | 18:0/22:4                           | C <sub>49</sub> H <sub>87</sub> O <sub>13</sub> P               | 913.5812  | 913.5  | [M-H] <sup>-</sup> | 0.30 × 10 <sup>6</sup>  | 14.3 | 1.17 |
| 40:5      | 18:0/22:5                           | C <sub>49</sub> H <sub>85</sub> O <sub>13</sub> P               | 911.5655  | 911.5  | [M-H] <sup>-</sup> | 0.68 × 10 <sup>6</sup>  | 14.0 | 1.17 |

|                       |           |                                                   |          |       |                    |                        |      |      |
|-----------------------|-----------|---------------------------------------------------|----------|-------|--------------------|------------------------|------|------|
| 40:6                  | 18:0/22:6 | C <sub>49</sub> H <sub>83</sub> O <sub>13</sub> P | 909.5499 | 909.5 | [M-H] <sup>-</sup> | 0.66 × 10 <sup>6</sup> | 10.6 | 1.16 |
| <b>1-LPI</b>          |           |                                                   |          |       |                    |                        |      |      |
| 16:0/0:0              |           | C <sub>25</sub> H <sub>49</sub> O <sub>12</sub> P | 571.2889 | 571.4 | [M-H] <sup>-</sup> | 0.79 × 10 <sup>5</sup> | 5.0  | 2.15 |
| 16:1/0:0              |           | C <sub>25</sub> H <sub>47</sub> O <sub>12</sub> P | 569.2732 | 569.3 | [M-H] <sup>-</sup> | 0.28 × 10 <sup>5</sup> | 19.9 | 2.17 |
| 18:0/0:0              |           | C <sub>27</sub> H <sub>53</sub> O <sub>12</sub> P | 599.3202 | 599.4 | [M-H] <sup>-</sup> | 4.44 × 10 <sup>5</sup> | 24.9 | 2.07 |
| 18:1/0:0              |           | C <sub>27</sub> H <sub>51</sub> O <sub>12</sub> P | 597.3045 | 597.4 | [M-H] <sup>-</sup> | 1.80 × 10 <sup>5</sup> | 13.8 | 2.07 |
| 18:2/0:0              |           | C <sub>27</sub> H <sub>49</sub> O <sub>12</sub> P | 595.2889 | 595.3 | [M-H] <sup>-</sup> | 1.36 × 10 <sup>5</sup> | 12.9 | 2.12 |
| 20:3/0:0              |           | C <sub>29</sub> H <sub>51</sub> O <sub>12</sub> P | 621.3045 | 621.4 | [M-H] <sup>-</sup> | 1.40 × 10 <sup>5</sup> | 12.7 | 2.03 |
| 20:4/0:0              |           | C <sub>29</sub> H <sub>49</sub> O <sub>12</sub> P | 619.2889 | 619.3 | [M-H] <sup>-</sup> | 6.23 × 10 <sup>5</sup> | 13.4 | 2.02 |
| 22:4/0:0 <sup>a</sup> |           | C <sub>31</sub> H <sub>53</sub> O <sub>12</sub> P | 647.3202 | 647.4 | [M-H] <sup>-</sup> | 0.09 × 10 <sup>5</sup> | 11.1 | 1.98 |
| 22:5/0:0              |           | C <sub>31</sub> H <sub>51</sub> O <sub>12</sub> P | 645.3045 | 645.3 | [M-H] <sup>-</sup> | 0.31 × 10 <sup>5</sup> | 18.2 | 2.00 |
| 22:6/0:0              |           | C <sub>31</sub> H <sub>49</sub> O <sub>12</sub> P | 643.2889 | 643.3 | [M-H] <sup>-</sup> | 0.36 × 10 <sup>5</sup> | 14.9 | 1.98 |
| <b>2-LPI</b>          |           |                                                   |          |       |                    |                        |      |      |
| 0:0/16:0              |           | C <sub>25</sub> H <sub>49</sub> O <sub>12</sub> P | 571.2889 | 571.4 | [M-H] <sup>-</sup> | 0.50 × 10 <sup>5</sup> | 26.7 | 1.93 |
| 0:0/16:1              |           | C <sub>25</sub> H <sub>47</sub> O <sub>12</sub> P | 569.2732 | 569.3 | [M-H] <sup>-</sup> | 0.06 × 10 <sup>5</sup> | 34.3 | 1.95 |
| 0:0/18:0              |           | C <sub>27</sub> H <sub>53</sub> O <sub>12</sub> P | 599.3202 | 599.4 | [M-H] <sup>-</sup> | 0.85 × 10 <sup>5</sup> | 13.1 | 1.85 |
| 0:0/18:1              |           | C <sub>27</sub> H <sub>51</sub> O <sub>12</sub> P | 597.3045 | 597.4 | [M-H] <sup>-</sup> | 0.38 × 10 <sup>5</sup> | 14.5 | 1.88 |
| 0:0/18:2              |           | C <sub>27</sub> H <sub>49</sub> O <sub>12</sub> P | 595.2889 | 595.3 | [M-H] <sup>-</sup> | 0.17 × 10 <sup>5</sup> | 11.6 | 1.88 |
| 0:0/20:3              |           | C <sub>29</sub> H <sub>51</sub> O <sub>12</sub> P | 621.3045 | 621.4 | [M-H] <sup>-</sup> | 0.47 × 10 <sup>5</sup> | 10.1 | 1.82 |
| 0:0/20:4              |           | C <sub>29</sub> H <sub>49</sub> O <sub>12</sub> P | 619.2889 | 619.3 | [M-H] <sup>-</sup> | 2.06 × 10 <sup>5</sup> | 10.4 | 1.80 |
| 0:0/22:4 <sup>a</sup> |           | C <sub>31</sub> H <sub>53</sub> O <sub>12</sub> P | 647.3202 | 647.4 | [M-H] <sup>-</sup> | 0.10 × 10 <sup>5</sup> | 9.6  | 1.82 |
| 0:0/22:5              |           | C <sub>31</sub> H <sub>51</sub> O <sub>12</sub> P | 645.3045 | 645.3 | [M-H] <sup>-</sup> | 0.22 × 10 <sup>5</sup> | 25.0 | 1.81 |
| 0:0/22:6              |           | C <sub>31</sub> H <sub>49</sub> O <sub>12</sub> P | 643.2889 | 643.3 | [M-H] <sup>-</sup> | 0.28 × 10 <sup>5</sup> | 12.7 | 1.81 |
| <b>PE<sup>a</sup></b> |           |                                                   |          |       |                    |                        |      |      |
| 34:0                  |           | C <sub>39</sub> H <sub>78</sub> NO <sub>8</sub> P | 718.5392 | 718.5 | [M-H] <sup>-</sup> | 0.08 × 10 <sup>5</sup> | 3.0  | 5.37 |
| 34:1                  |           | C <sub>39</sub> H <sub>76</sub> NO <sub>8</sub> P | 716.5236 | 716.5 | [M-H] <sup>-</sup> | 0.52 × 10 <sup>5</sup> | 6.2  | 5.37 |
| 34:2                  |           | C <sub>39</sub> H <sub>74</sub> NO <sub>8</sub> P | 714.5079 | 714.5 | [M-H] <sup>-</sup> | 0.84 × 10 <sup>5</sup> | 4.8  | 5.38 |
| 34:3                  |           | C <sub>39</sub> H <sub>72</sub> NO <sub>8</sub> P | 712.4923 | 712.5 | [M-H] <sup>-</sup> | 0.08 × 10 <sup>5</sup> | 7.0  | 5.39 |
| 36:1                  |           | C <sub>41</sub> H <sub>80</sub> NO <sub>8</sub> P | 744.5549 | 744.5 | [M-H] <sup>-</sup> | 0.52 × 10 <sup>5</sup> | 14.8 | 5.22 |
| 36:2                  |           | C <sub>41</sub> H <sub>78</sub> NO <sub>8</sub> P | 742.5392 | 742.5 | [M-H] <sup>-</sup> | 1.58 × 10 <sup>5</sup> | 10.2 | 5.23 |
| 36:3                  |           | C <sub>41</sub> H <sub>76</sub> NO <sub>8</sub> P | 740.5236 | 740.5 | [M-H] <sup>-</sup> | 0.82 × 10 <sup>5</sup> | 11.4 | 5.21 |
| 36:4                  |           | C <sub>41</sub> H <sub>74</sub> NO <sub>8</sub> P | 738.5079 | 738.5 | [M-H] <sup>-</sup> | 1.84 × 10 <sup>5</sup> | 9.0  | 5.02 |
| 36:5                  |           | C <sub>41</sub> H <sub>72</sub> NO <sub>8</sub> P | 736.4923 | 736.5 | [M-H] <sup>-</sup> | 0.39 × 10 <sup>5</sup> | 10.1 | 5.07 |
| 38:1                  |           | C <sub>43</sub> H <sub>84</sub> NO <sub>8</sub> P | 772.5862 | 772.5 | [M-H] <sup>-</sup> | 1.37 × 10 <sup>5</sup> | 13.2 | 4.53 |
| 38:2                  |           | C <sub>43</sub> H <sub>82</sub> NO <sub>8</sub> P | 770.5705 | 770.5 | [M-H] <sup>-</sup> | 0.14 × 10 <sup>5</sup> | 1.9  | 4.56 |
| 38:3                  |           | C <sub>43</sub> H <sub>80</sub> NO <sub>8</sub> P | 768.5549 | 768.5 | [M-H] <sup>-</sup> | 0.64 × 10 <sup>5</sup> | 11.3 | 4.89 |
| 38:4                  |           | C <sub>43</sub> H <sub>78</sub> NO <sub>8</sub> P | 766.5392 | 766.5 | [M-H] <sup>-</sup> | 3.50 × 10 <sup>5</sup> | 10.4 | 4.89 |
| 38:5                  |           | C <sub>43</sub> H <sub>76</sub> NO <sub>8</sub> P | 764.5236 | 764.5 | [M-H] <sup>-</sup> | 1.58 × 10 <sup>5</sup> | 8.8  | 4.90 |

|                          |      |                                                   |          |       |                    |                        |      |       |
|--------------------------|------|---------------------------------------------------|----------|-------|--------------------|------------------------|------|-------|
| 38:6                     |      | C <sub>43</sub> H <sub>74</sub> NO <sub>8</sub> P | 762.5079 | 762.5 | [M-H] <sup>-</sup> | 2.23 × 10 <sup>5</sup> | 8.2  | 4.94  |
| 40:4                     |      | C <sub>45</sub> H <sub>82</sub> NO <sub>8</sub> P | 794.5705 | 794.5 | [M-H] <sup>-</sup> | 0.11 × 10 <sup>5</sup> | 9.9  | 4.79  |
| 40:5                     |      | C <sub>45</sub> H <sub>80</sub> NO <sub>8</sub> P | 792.5549 | 792.5 | [M-H] <sup>-</sup> | 0.40 × 10 <sup>5</sup> | 11.8 | 4.79  |
| 40:6                     |      | C <sub>45</sub> H <sub>78</sub> NO <sub>8</sub> P | 790.5392 | 790.5 | [M-H] <sup>-</sup> | 1.08 × 10 <sup>5</sup> | 9.6  | 4.80  |
| 40:7                     |      | C <sub>45</sub> H <sub>76</sub> NO <sub>8</sub> P | 788.5236 | 788.5 | [M-H] <sup>-</sup> | 0.30 × 10 <sup>5</sup> | 8.8  | 4.79  |
| <b>1-LPE<sup>a</sup></b> |      |                                                   |          |       |                    |                        |      |       |
| 16:0/0:0                 |      | C <sub>21</sub> H <sub>44</sub> NO <sub>7</sub> P | 452.2783 | 452.3 | [M-H] <sup>-</sup> | 0.84 × 10 <sup>5</sup> | 0.6  | 10.33 |
| 18:0/0:0                 |      | C <sub>23</sub> H <sub>48</sub> NO <sub>7</sub> P | 480.3096 | 480.4 | [M-H] <sup>-</sup> | 0.69 × 10 <sup>5</sup> | 16.4 | 10.02 |
| 18:1/0:0                 |      | C <sub>23</sub> H <sub>46</sub> NO <sub>7</sub> P | 478.2939 | 478.3 | [M-H] <sup>-</sup> | 0.86 × 10 <sup>5</sup> | 14.0 | 10.08 |
| 18:2/0:0                 |      | C <sub>23</sub> H <sub>44</sub> NO <sub>7</sub> P | 476.2782 | 476.3 | [M-H] <sup>-</sup> | 1.65 × 10 <sup>5</sup> | 11.6 | 10.23 |
| 20:3/0:0                 |      | C <sub>25</sub> H <sub>46</sub> NO <sub>7</sub> P | 502.2939 | 502.3 | [M-H] <sup>-</sup> | 0.11 × 10 <sup>5</sup> | 24.9 | 9.91  |
| 20:4/0:0                 |      | C <sub>25</sub> H <sub>44</sub> NO <sub>7</sub> P | 500.2783 | 500.3 | [M-H] <sup>-</sup> | 0.57 × 10 <sup>5</sup> | 31.0 | 9.88  |
| 22:5/0:0                 |      | C <sub>27</sub> H <sub>46</sub> NO <sub>7</sub> P | 526.2939 | 526.3 | [M-H] <sup>-</sup> | 0.04 × 10 <sup>5</sup> | 31.3 | 9.82  |
| 22:6/0:0                 |      | C <sub>27</sub> H <sub>44</sub> NO <sub>7</sub> P | 524.2783 | 524.3 | [M-H] <sup>-</sup> | 0.11 × 10 <sup>5</sup> | 22.7 | 9.76  |
| <b>2-LPE<sup>a</sup></b> |      |                                                   |          |       |                    |                        |      |       |
| 0:0/16:0                 |      | C <sub>21</sub> H <sub>44</sub> NO <sub>7</sub> P | 452.2783 | 452.3 | [M-H] <sup>-</sup> | 0.17 × 10 <sup>5</sup> | 6.4  | 9.77  |
| 0:0/18:0                 |      | C <sub>23</sub> H <sub>48</sub> NO <sub>7</sub> P | 480.3096 | 480.4 | [M-H] <sup>-</sup> | 0.48 × 10 <sup>5</sup> | 33.7 | 9.44  |
| 0:0/18:1                 |      | C <sub>23</sub> H <sub>46</sub> NO <sub>7</sub> P | 478.2939 | 478.3 | [M-H] <sup>-</sup> | 0.36 × 10 <sup>5</sup> | 8.8  | 9.49  |
| 0:0/18:2                 |      | C <sub>23</sub> H <sub>44</sub> NO <sub>7</sub> P | 476.2782 | 476.3 | [M-H] <sup>-</sup> | 0.43 × 10 <sup>5</sup> | 13.0 | 9.66  |
| 0:0/20:3                 |      | C <sub>25</sub> H <sub>46</sub> NO <sub>7</sub> P | 502.2939 | 502.3 | [M-H] <sup>-</sup> | 0.22 × 10 <sup>5</sup> | 7.9  | 9.26  |
| 0:0/20:4                 |      | C <sub>25</sub> H <sub>44</sub> NO <sub>7</sub> P | 500.2783 | 500.3 | [M-H] <sup>-</sup> | 2.21 × 10 <sup>5</sup> | 7.6  | 9.23  |
| 0:0/22:5                 |      | C <sub>27</sub> H <sub>46</sub> NO <sub>7</sub> P | 526.2939 | 526.3 | [M-H] <sup>-</sup> | 0.39 × 10 <sup>5</sup> | 11.2 | 9.20  |
| 0:0/22:6                 |      | C <sub>27</sub> H <sub>44</sub> NO <sub>7</sub> P | 524.2783 | 524.3 | [M-H] <sup>-</sup> | 1.79 × 10 <sup>5</sup> | 13.0 | 9.14  |
| <b>FA<sup>a</sup></b>    |      |                                                   |          |       |                    |                        |      |       |
|                          | 14:0 | C <sub>14</sub> H <sub>28</sub> O <sub>2</sub>    | 227.2017 | 227.3 | [M-H] <sup>-</sup> | ND                     | ND   | 0.99  |
|                          | 15:0 | C <sub>15</sub> H <sub>30</sub> O <sub>2</sub>    | 241.2173 | 241.3 | [M-H] <sup>-</sup> | ND                     | ND   | 0.99  |
|                          | 16:0 | C <sub>16</sub> H <sub>32</sub> O <sub>2</sub>    | 255.2329 | 255.3 | [M-H] <sup>-</sup> | ND                     | ND   | 0.99  |
|                          | 16:1 | C <sub>16</sub> H <sub>30</sub> O <sub>2</sub>    | 253.2173 | 253.3 | [M-H] <sup>-</sup> | ND                     | ND   | 0.99  |
|                          | 17:0 | C <sub>17</sub> H <sub>34</sub> O <sub>2</sub>    | 269.2486 | 269.3 | [M-H] <sup>-</sup> | ND                     | ND   | 0.98  |
|                          | 17:1 | C <sub>17</sub> H <sub>32</sub> O <sub>2</sub>    | 267.2330 | 267.3 | [M-H] <sup>-</sup> | ND                     | ND   | 0.98  |
|                          | 18:0 | C <sub>18</sub> H <sub>36</sub> O <sub>2</sub>    | 283.2643 | 283.3 | [M-H] <sup>-</sup> | ND                     | ND   | 0.98  |
|                          | 18:1 | C <sub>18</sub> H <sub>34</sub> O <sub>2</sub>    | 281.2486 | 281.3 | [M-H] <sup>-</sup> | ND                     | ND   | 0.98  |
|                          | 18:2 | C <sub>18</sub> H <sub>32</sub> O <sub>2</sub>    | 279.2330 | 279.3 | [M-H] <sup>-</sup> | ND                     | ND   | 0.98  |
|                          | 18:3 | C <sub>18</sub> H <sub>30</sub> O <sub>2</sub>    | 277.2173 | 277.3 | [M-H] <sup>-</sup> | ND                     | ND   | 0.99  |
|                          | 20:3 | C <sub>20</sub> H <sub>34</sub> O <sub>2</sub>    | 305.2486 | 305.3 | [M-H] <sup>-</sup> | ND                     | ND   | 0.98  |
|                          | 20:4 | C <sub>20</sub> H <sub>32</sub> O <sub>2</sub>    | 303.2330 | 303.3 | [M-H] <sup>-</sup> | ND                     | ND   | 0.98  |
|                          | 22:4 | C <sub>22</sub> H <sub>36</sub> O <sub>2</sub>    | 331.2643 | 331.3 | [M-H] <sup>-</sup> | ND                     | ND   | 0.97  |
|                          | 22:5 | C <sub>22</sub> H <sub>34</sub> O <sub>2</sub>    | 329.2486 | 329.3 | [M-H] <sup>-</sup> | ND                     | ND   | 0.98  |

|  |      |                                                |          |       |                    |    |    |      |
|--|------|------------------------------------------------|----------|-------|--------------------|----|----|------|
|  | 22:6 | C <sub>22</sub> H <sub>32</sub> O <sub>2</sub> | 327.2330 | 327.3 | [M-H] <sup>-</sup> | ND | ND | 0.98 |
|--|------|------------------------------------------------|----------|-------|--------------------|----|----|------|

RT = retention time, ND = not determined

<sup>a</sup> Lipid species that could not be confirmed by MS/MS experiments but their presence in human plasma can be predicted based on measured MS spectra and their earlier identification in previous works.

<sup>b</sup> Two retention times are stated due to probable presence of GalCer and GlcCer species.

<sup>c</sup> Two retention times are reported due to separation of Gb<sub>4</sub> subclass into peaks corresponding to the short and long N-acyl chains, and probably caused by isomerism, as stated in the text.

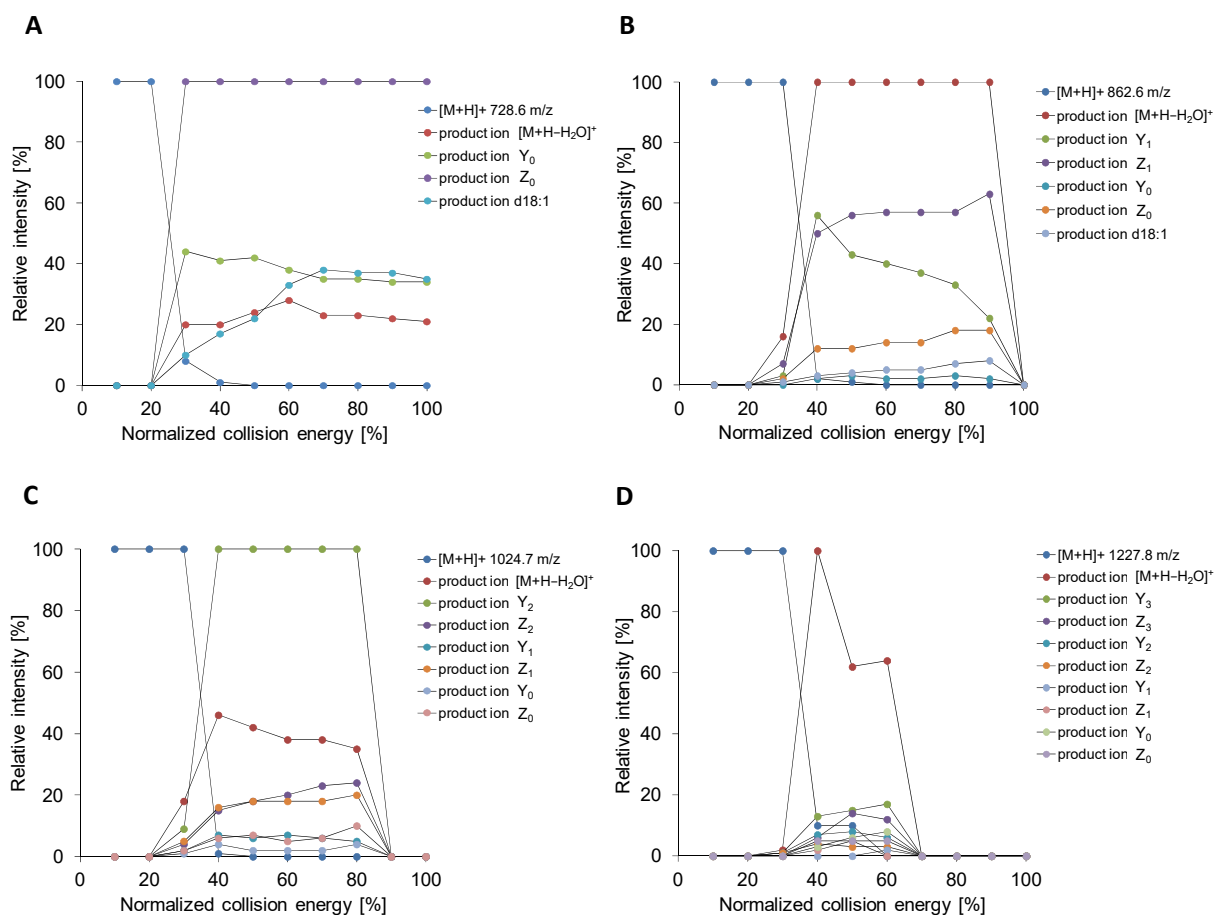

**Figure S1.** Optimization of normalized collision energy (NCE) for neutral GSL subclasses using the commercially available TLC neutral GSL mixture. The graphs display the relative intensity of the precursor and product ions obtained by MS/MS analysis of **(A)** HexCer 18:1/16:0 at  $m/z$  700.6, **(B)** Hex<sub>2</sub>Cer 18:1/16:0 at  $m/z$  862.6, **(C)** Gb<sub>3</sub> 18:1/16:0 at  $m/z$  1024.7, and **(D)** Gb<sub>4</sub> 18:1/16:0 at  $m/z$  1227.8.

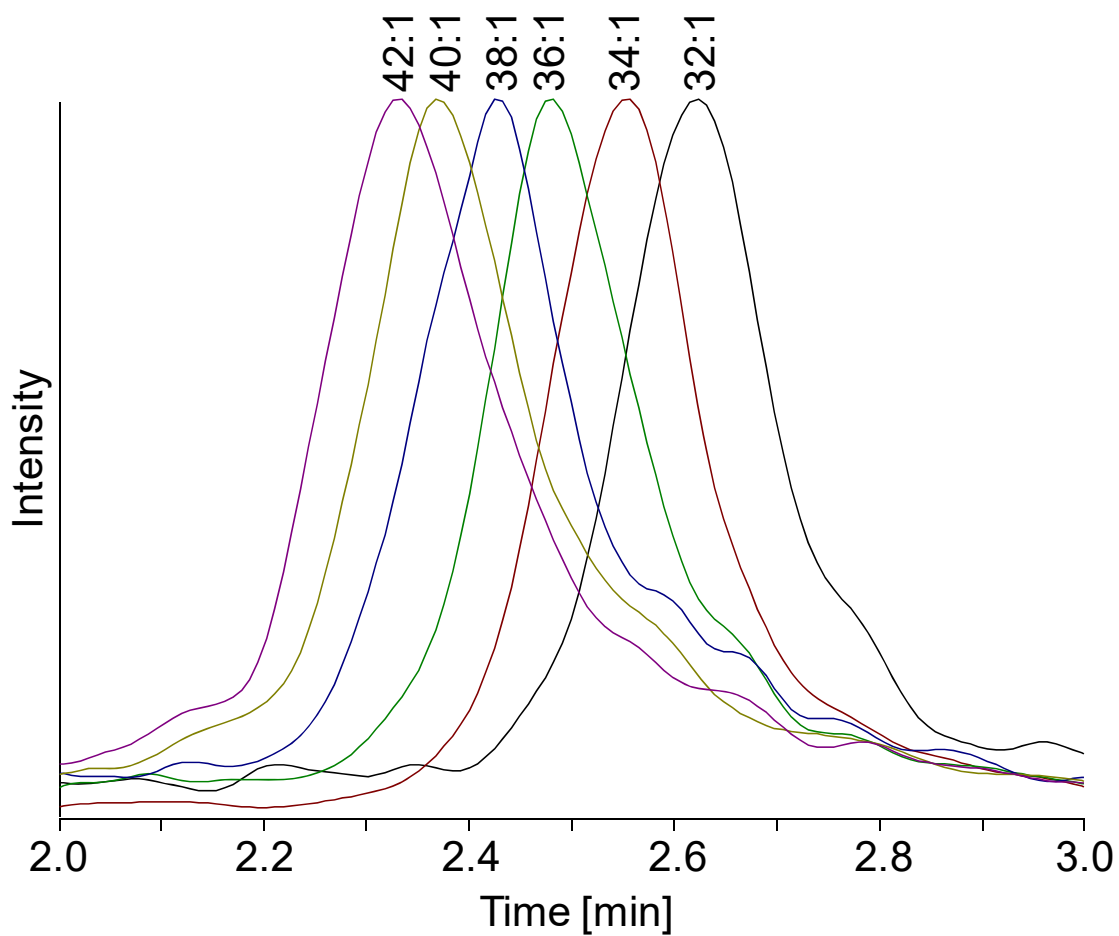

**Figure S2.** Overlay of reconstructed ion current (RIC) chromatograms of individual glycosphingolipid species within Gb<sub>3</sub> subclass with the number of carbon atoms and double bonds in the fatty acyl chain.

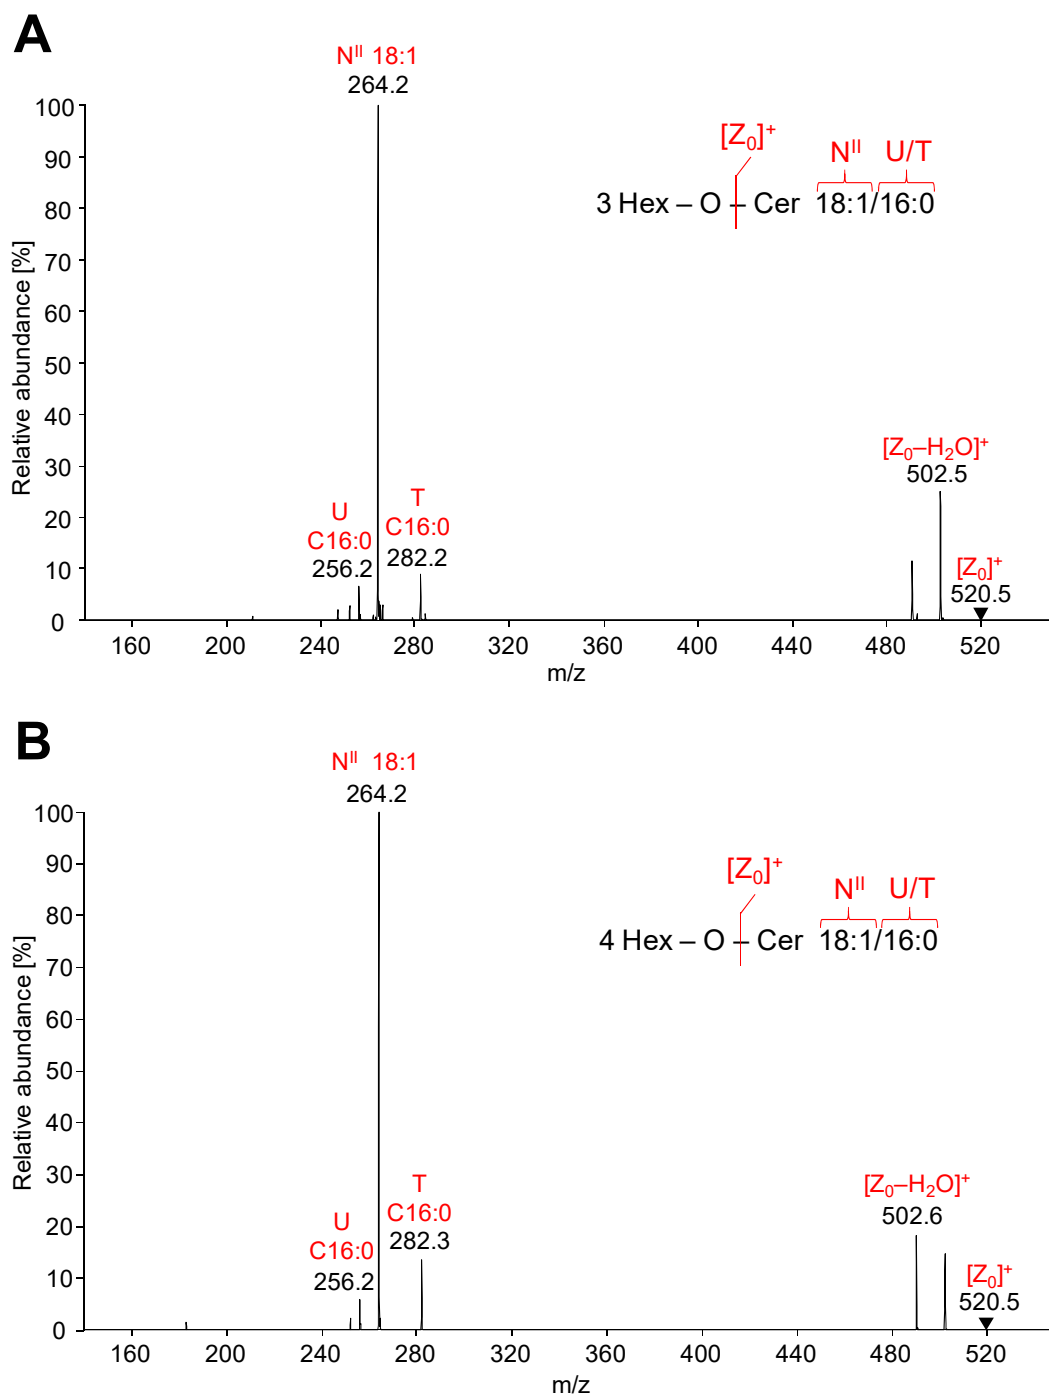

**Figure S3.** HILIC-ESI/MS<sup>3</sup> spectra of product ion  $[Z_0]^+$  at  $m/z$  520.5 for (A) Gb<sub>3</sub> 18:1/16:0 and (B) Gb<sub>4</sub> 18:1/16:0 lipid species. MS<sup>3</sup> spectra confirm the specific composition of ceramide part, which consists of sphingosine base 18:1 and N-linked fatty acyl 16:0.



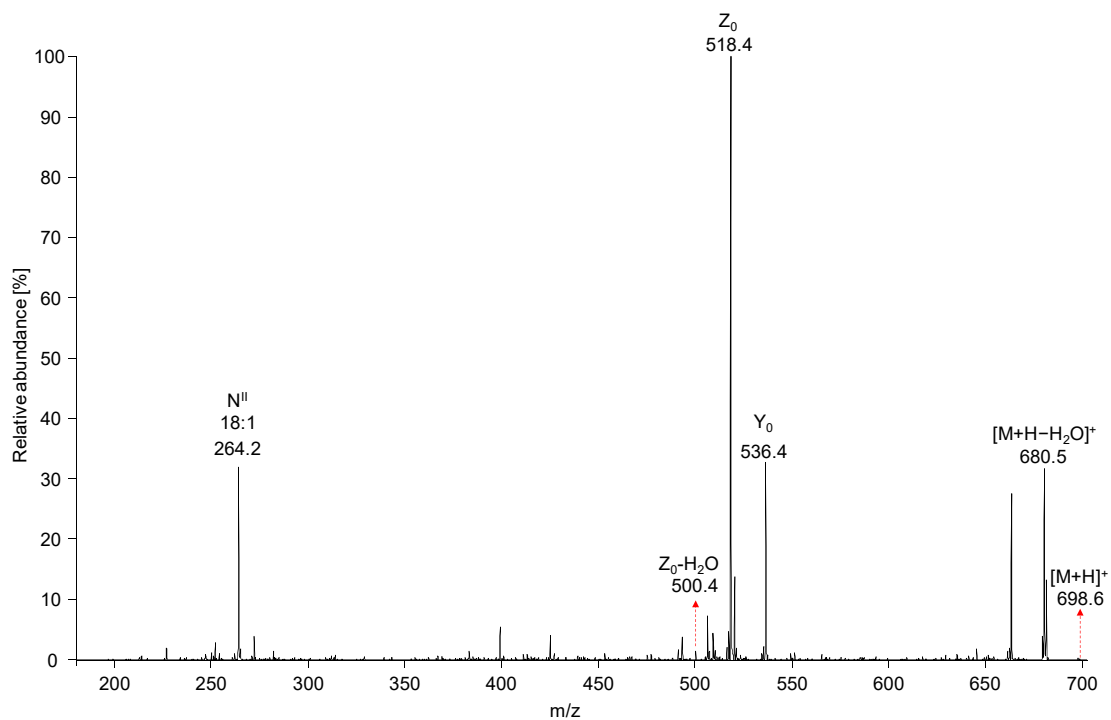

**Figure S4.** MS/MS spectrum of HexCer 34:2 at  $m/z$  698.6 with characteristic fragments.

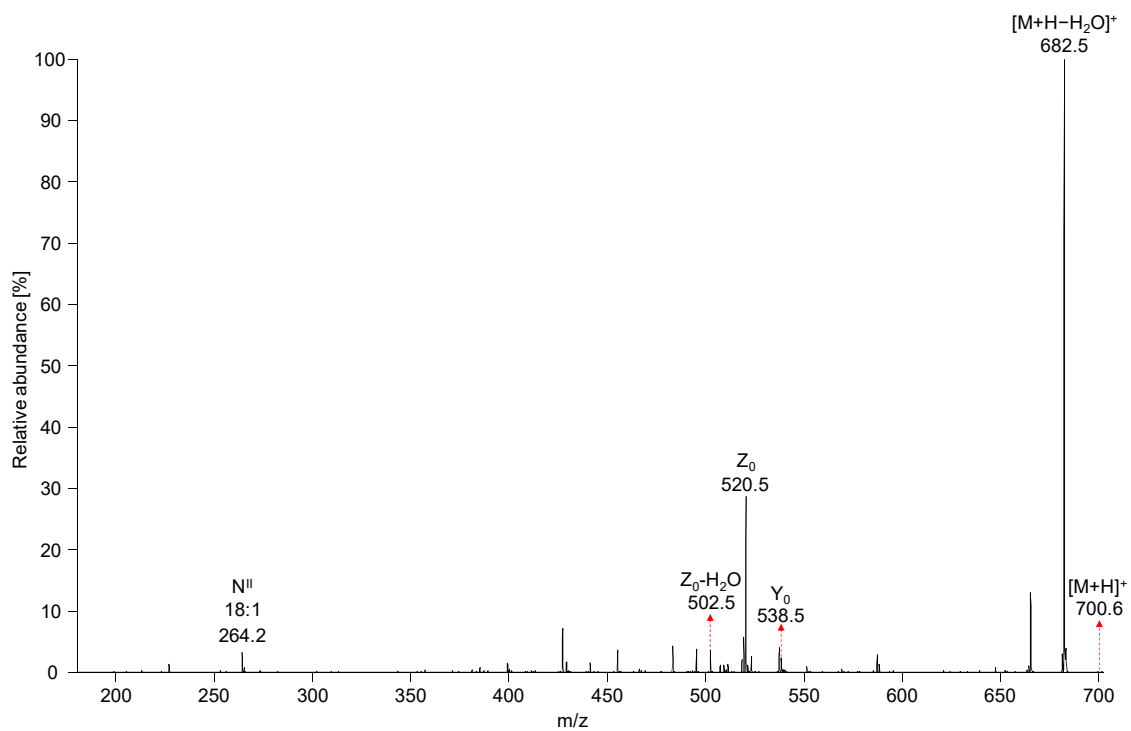

**Figure S5.** MS/MS spectrum of HexCer 34:1 at  $m/z$  700.6 with characteristic fragments.

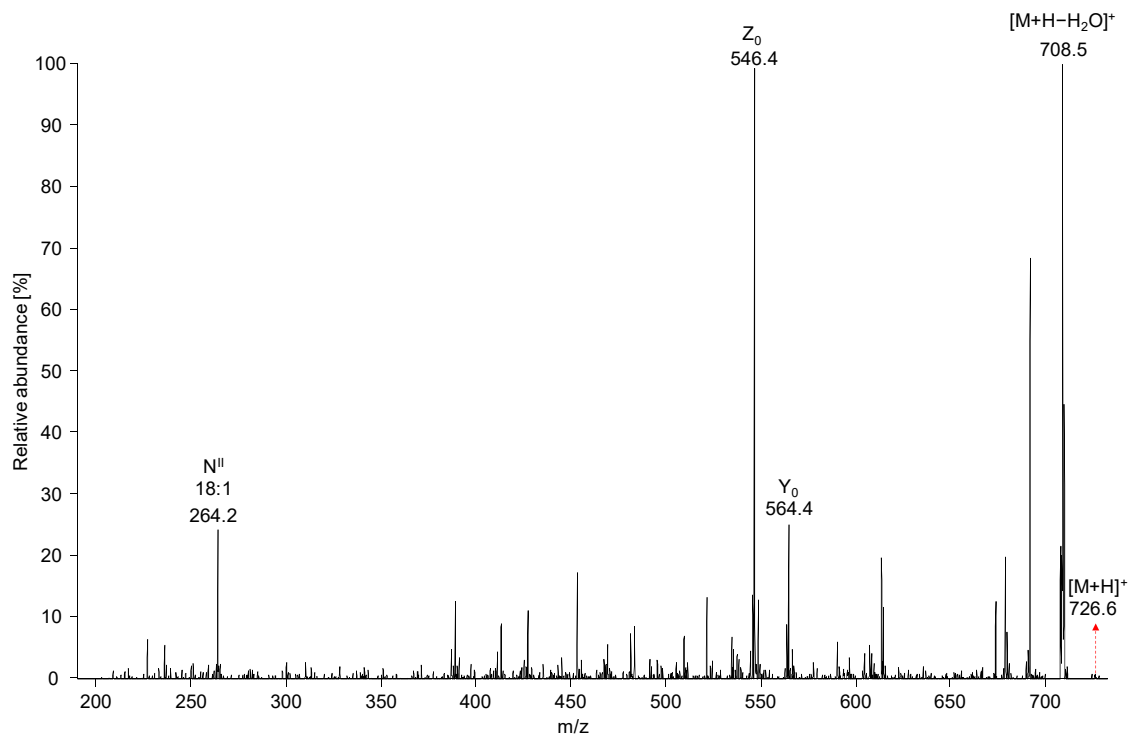

**Figure S6.** MS/MS spectrum of HexCer 36:2 at  $m/z$  726.6 with characteristic fragments.

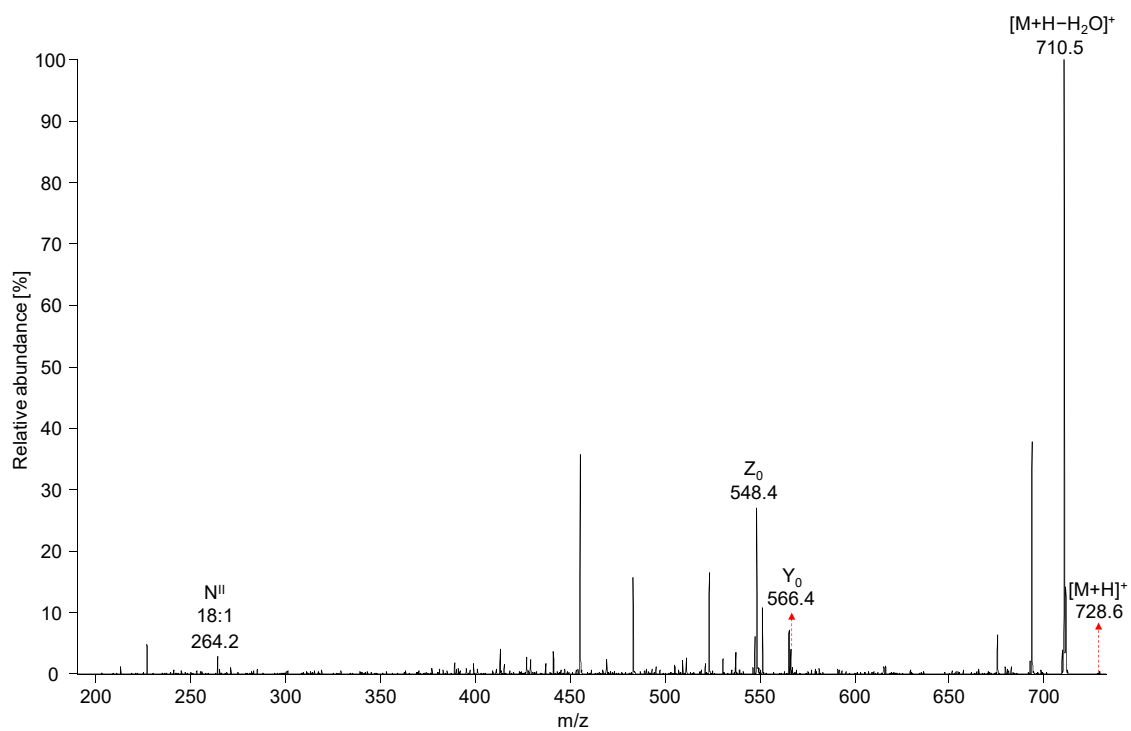

**Figure S7.** MS/MS spectrum of HexCer 36:1 at  $m/z$  728.6 with characteristic fragments.

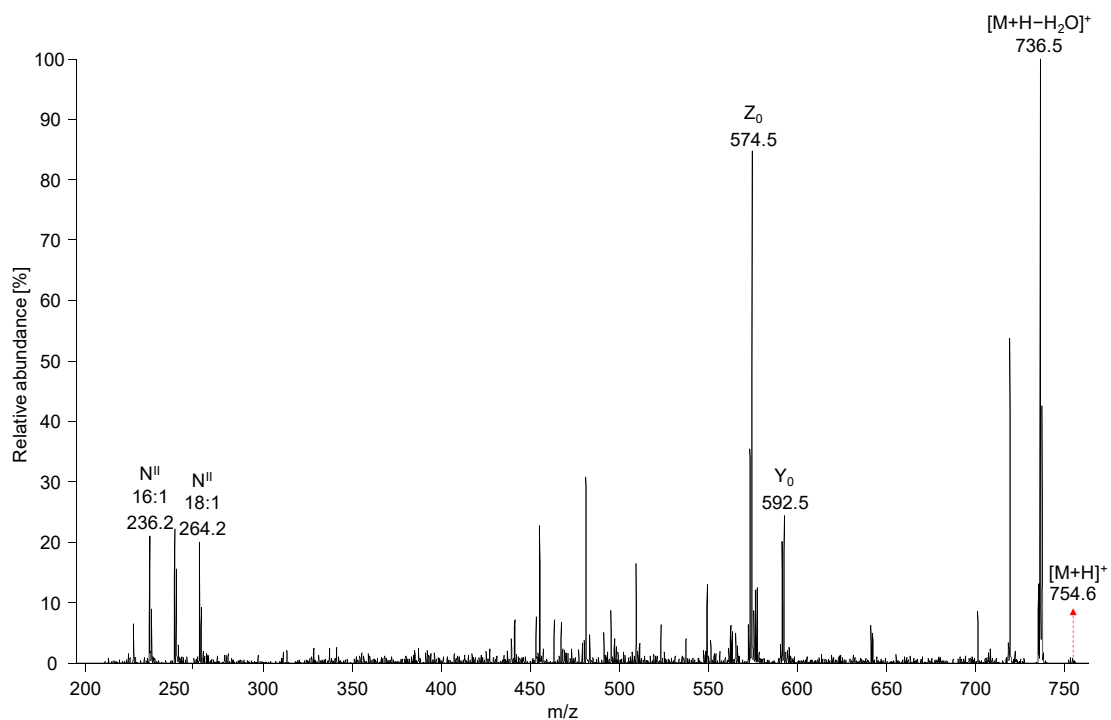

**Figure S8.** MS/MS spectrum of HexCer 38:2 at  $m/z$  754.6 with characteristic fragments.

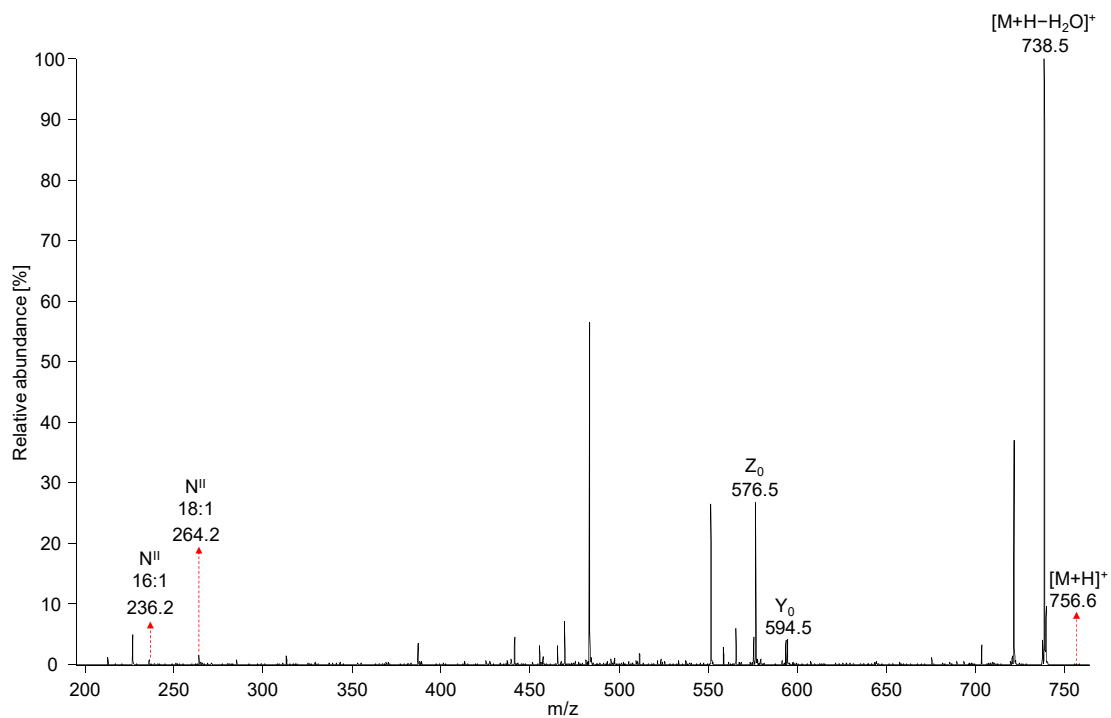

**Figure S9.** MS/MS spectrum of HexCer 38:1 at  $m/z$  756.6 with characteristic fragments.

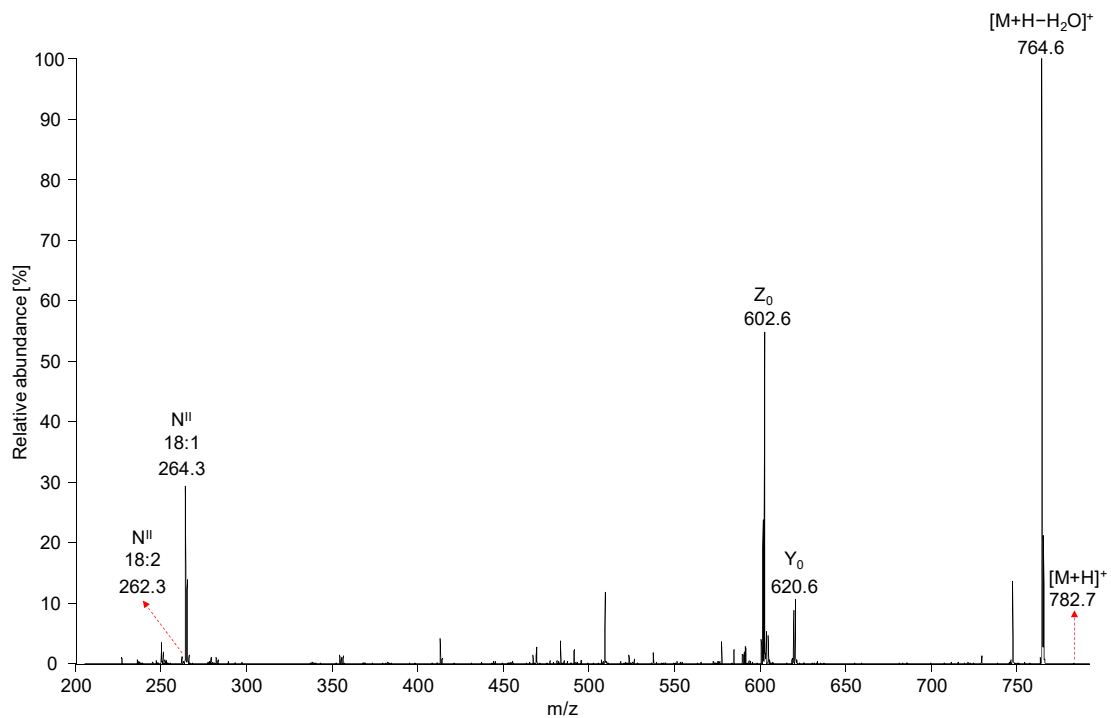

**Figure S10.** MS/MS spectrum of HexCer 40:2 at  $m/z$  782.7 with characteristic fragments.

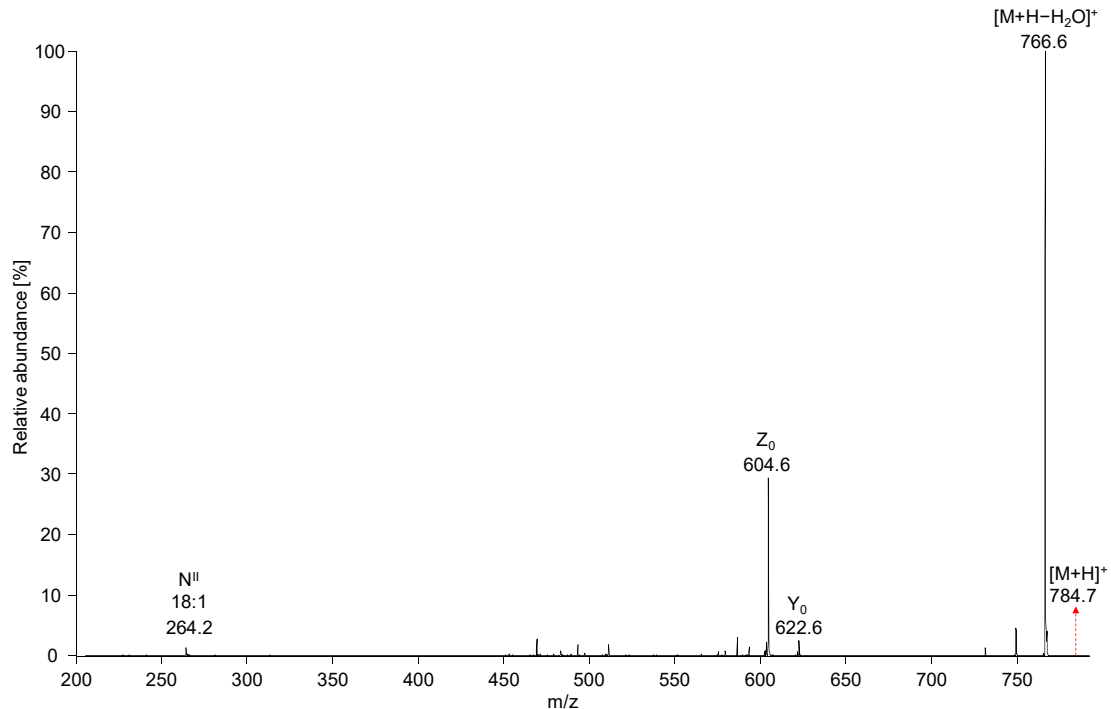

**Figure S11.** MS/MS spectrum of HexCer 40:1 at  $m/z$  784.7 with characteristic fragments.

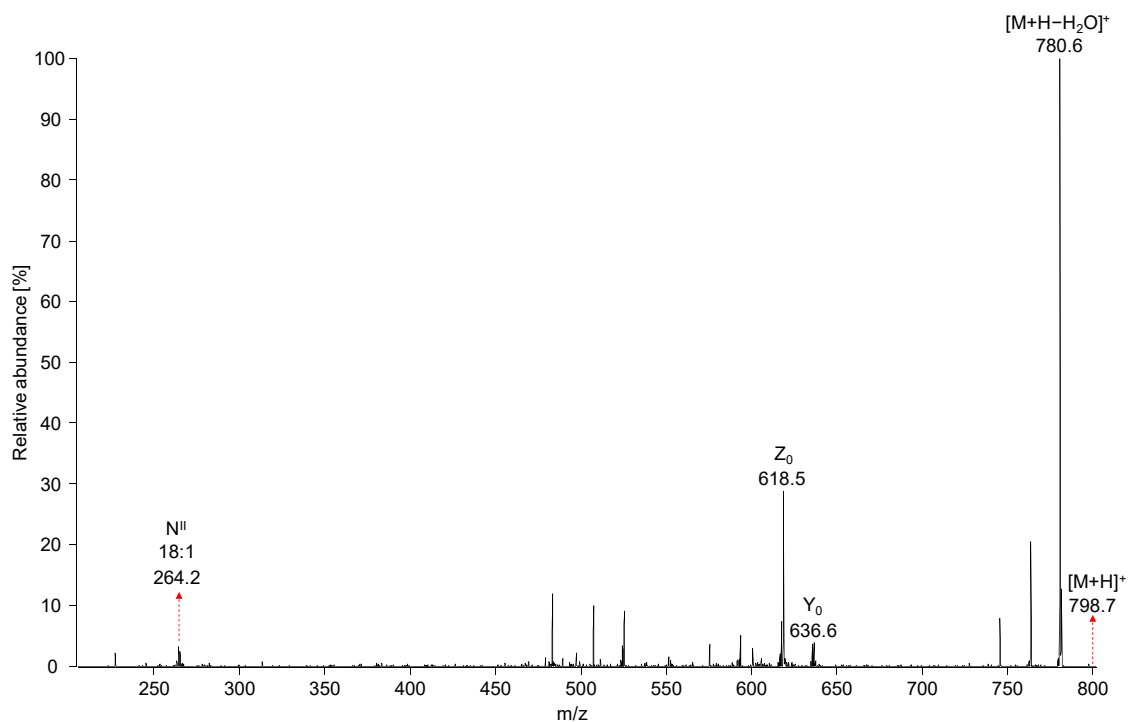

**Figure S12.** MS/MS spectrum of HexCer 41:1 at  $m/z$  798.7 with characteristic fragments.

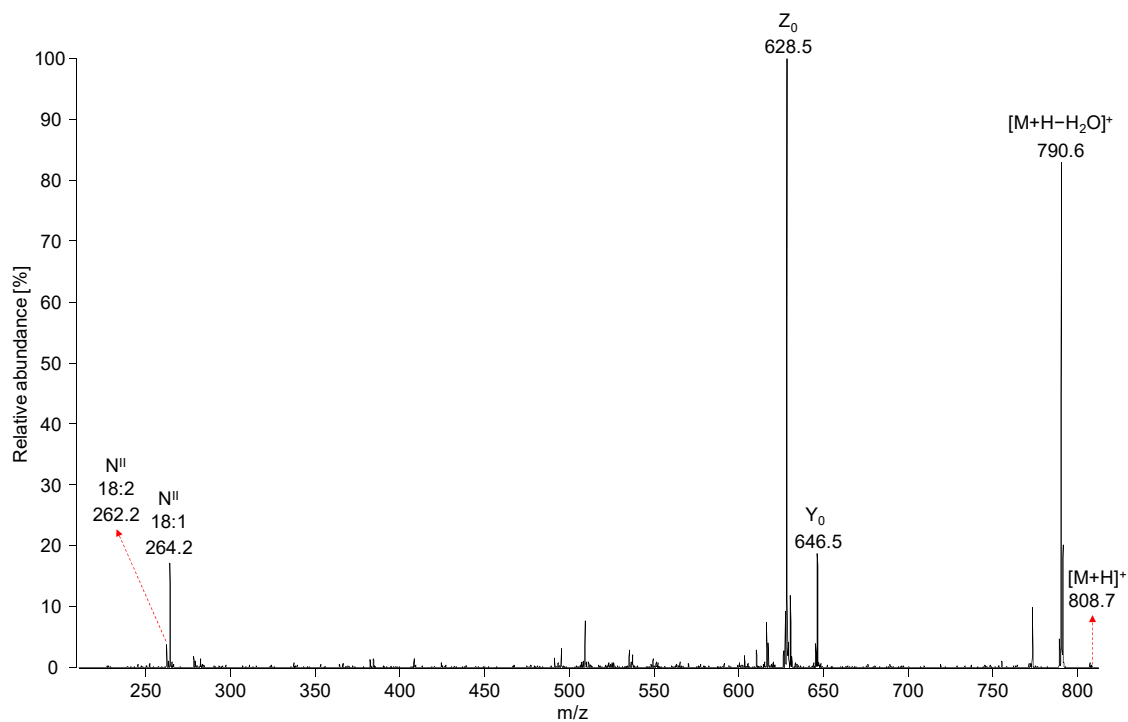

**Figure S13.** MS/MS spectrum of HexCer 42:3 at  $m/z$  808.7 with characteristic fragments.

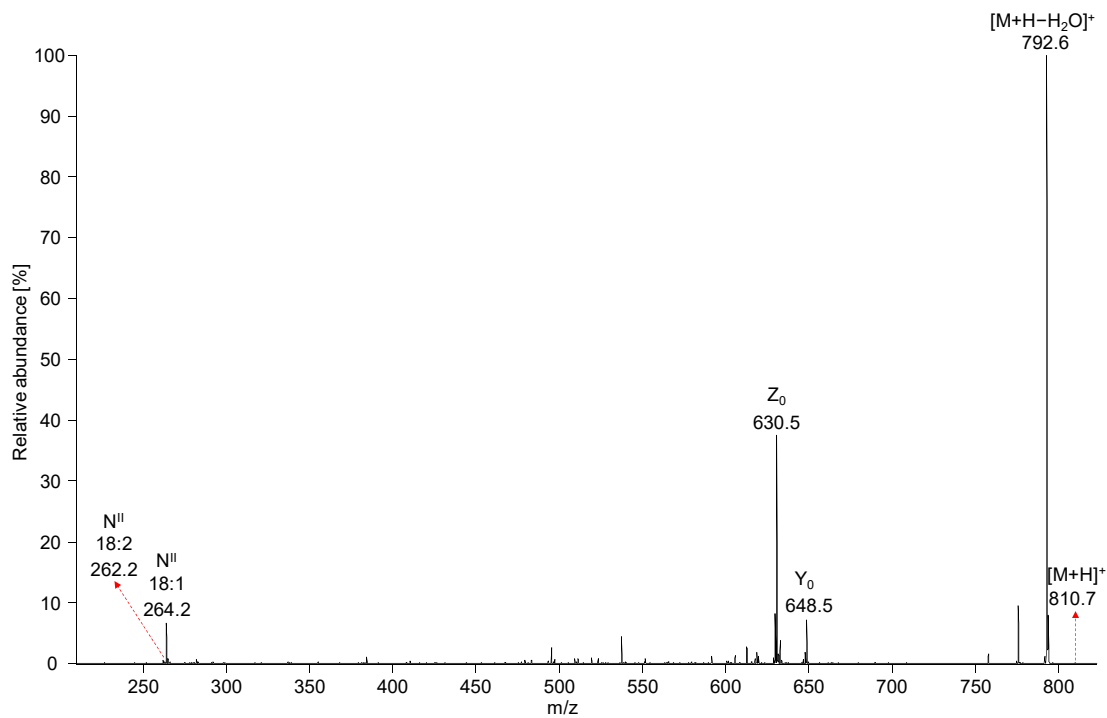

**Figure S14.** MS/MS spectrum of HexCer 42:2 at  $m/z$  810.7 with characteristic fragments.

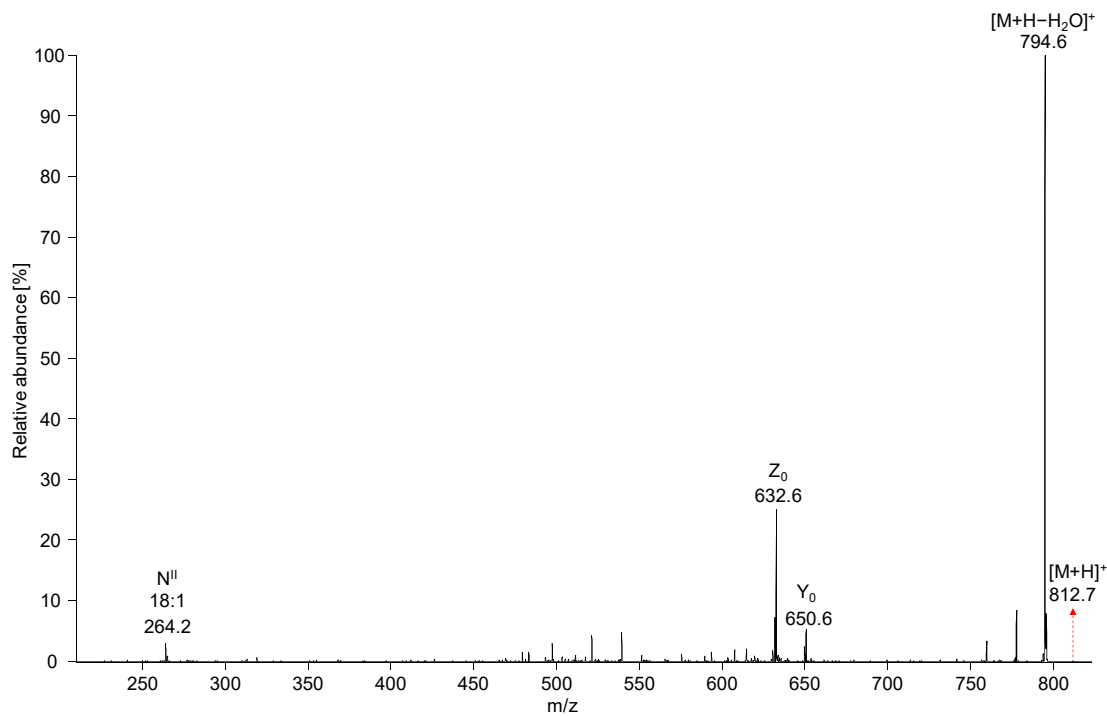

**Figure S15.** MS/MS spectrum of HexCer 42:1 at  $m/z$  812.7 with characteristic fragments.

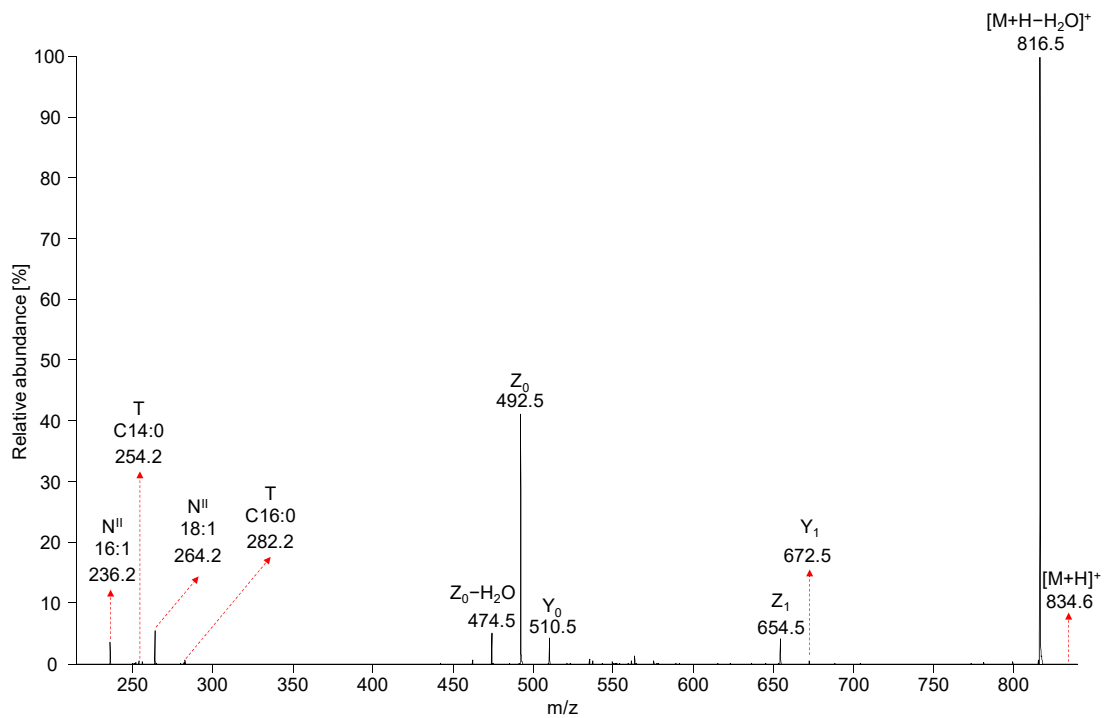

**Figure S16.** MS/MS spectrum of Hex<sub>2</sub>Cer 32:1 at  $m/z$  834.6 with characteristic fragments.

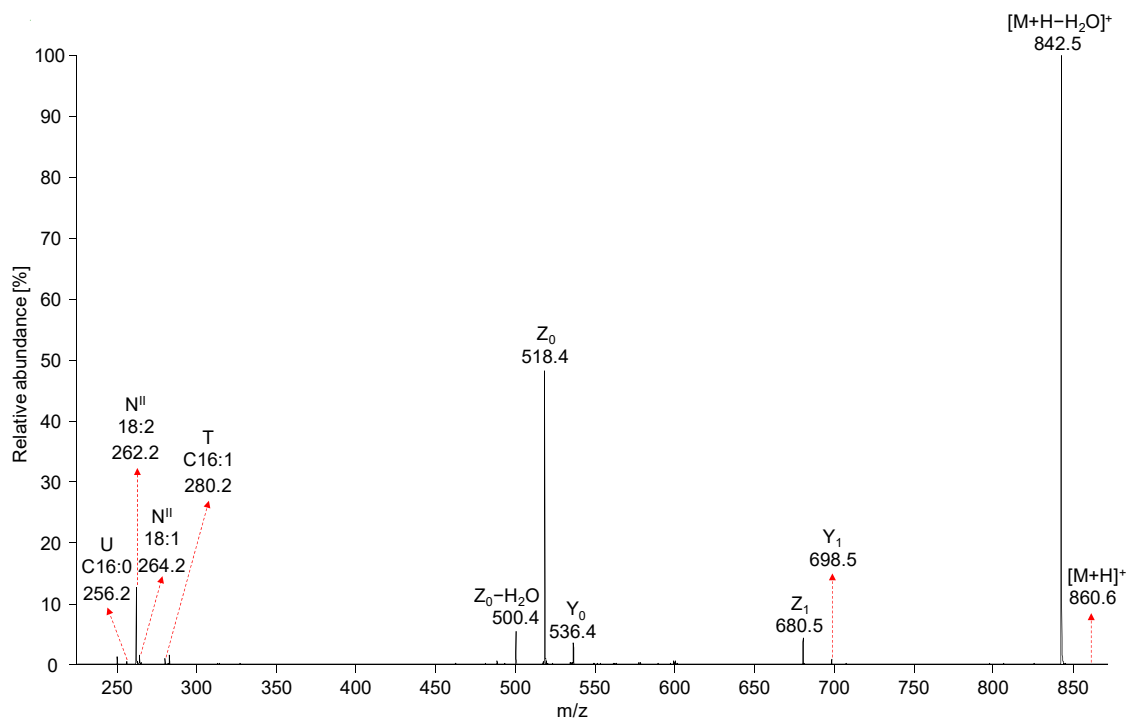

**Figure S17.** MS/MS spectrum of Hex<sub>2</sub>Cer 34:2 at  $m/z$  860.6 with characteristic fragments.

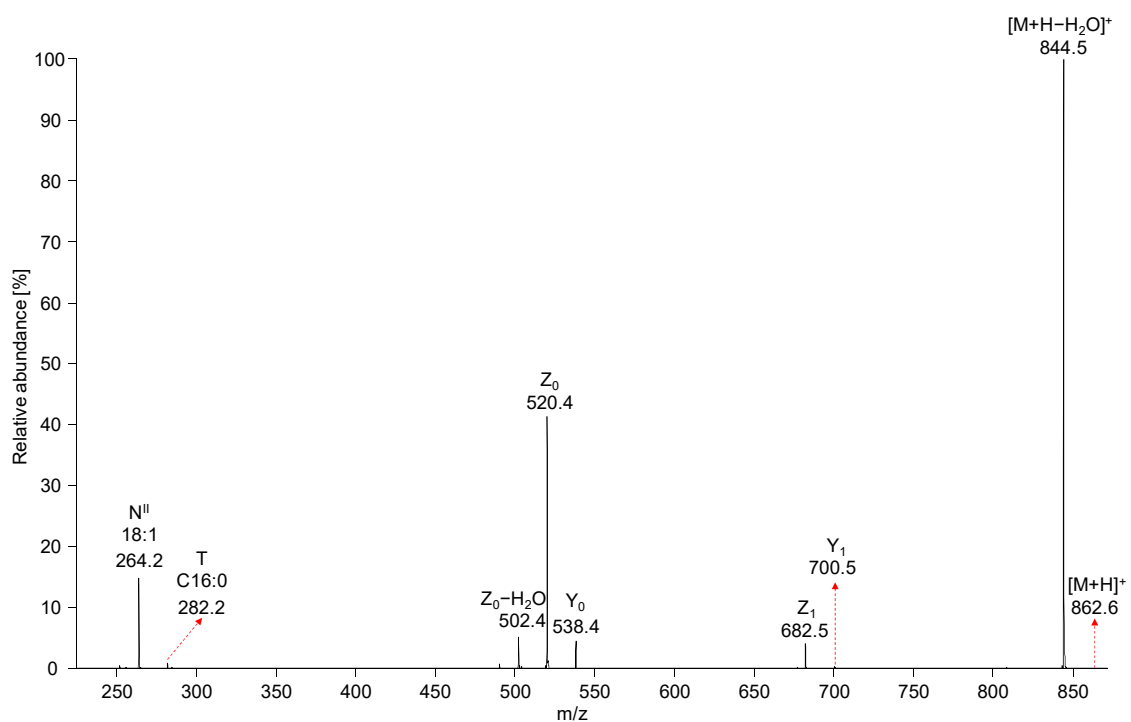

**Figure S18.** MS/MS spectrum of Hex<sub>2</sub>Cer 34:1 at  $m/z$  862.6 with characteristic fragments.

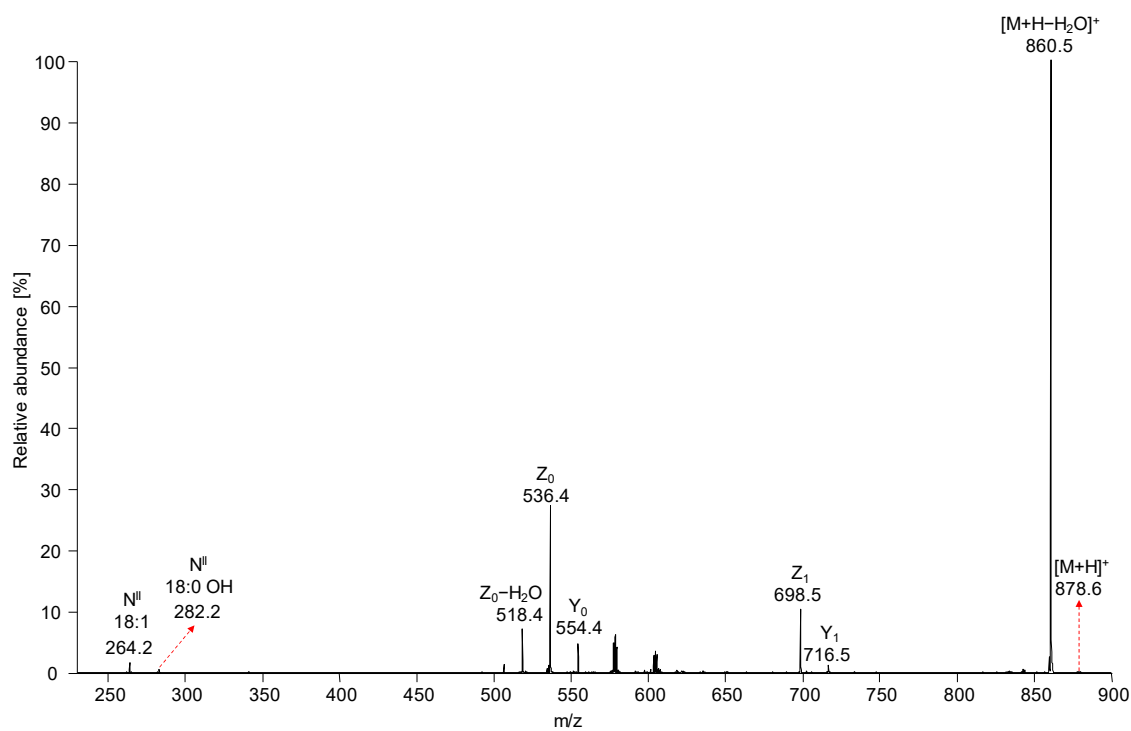

**Figure S19.** MS/MS spectrum of Hex<sub>2</sub>Cer 34:1 OH at  $m/z$  878.6 with characteristic fragments.



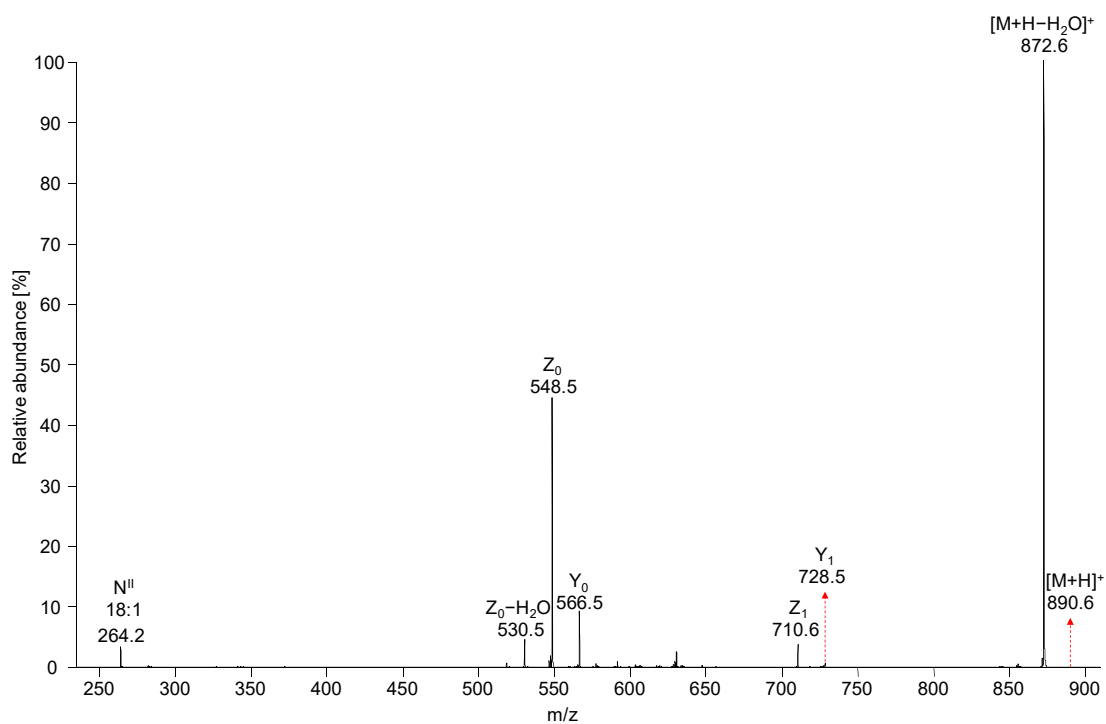

**Figure S20.** MS/MS spectrum of Hex<sub>2</sub>Cer 36:1 at  $m/z$  890.6 with characteristic fragments.

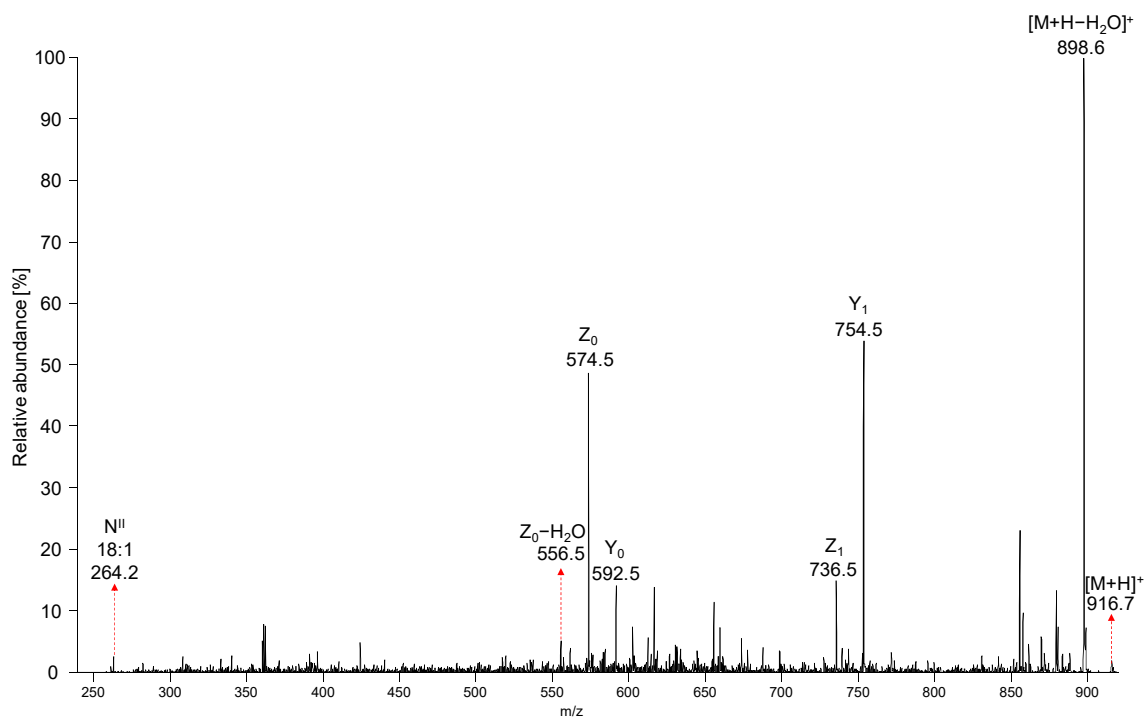

**Figure S21.** MS/MS spectrum of Hex<sub>2</sub>Cer 38:2 at  $m/z$  916.7 with characteristic fragments.

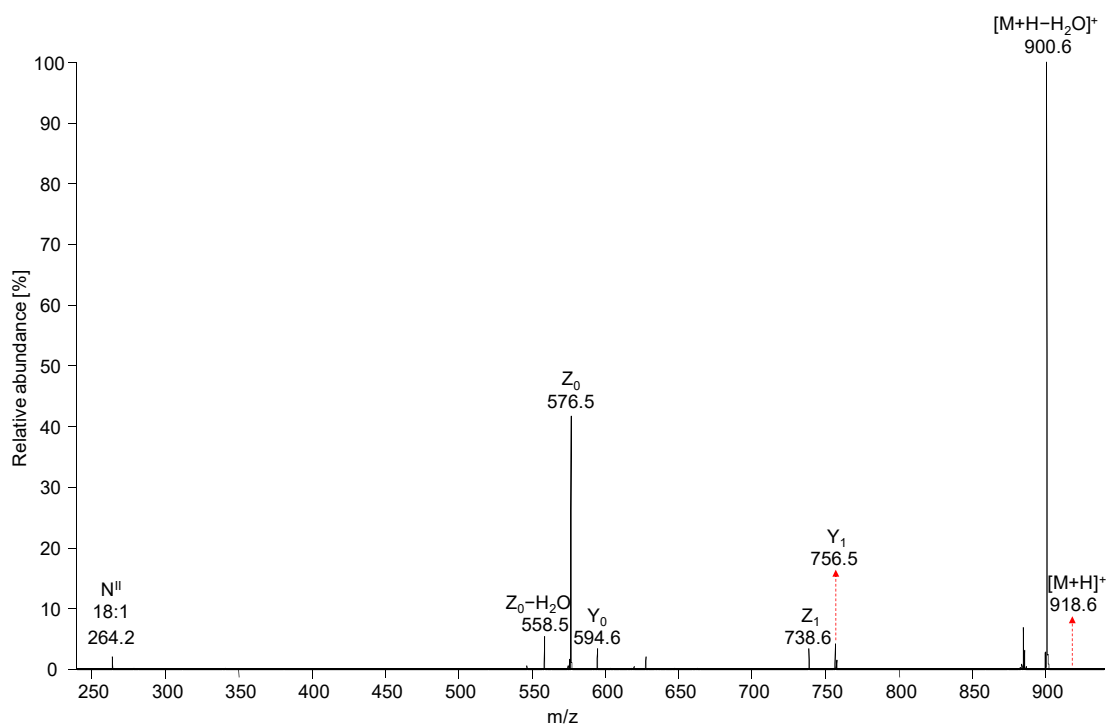

**Figure S22.** MS/MS spectrum of Hex<sub>2</sub>Cer 38:1 at m/z 918.6 with characteristic fragments.

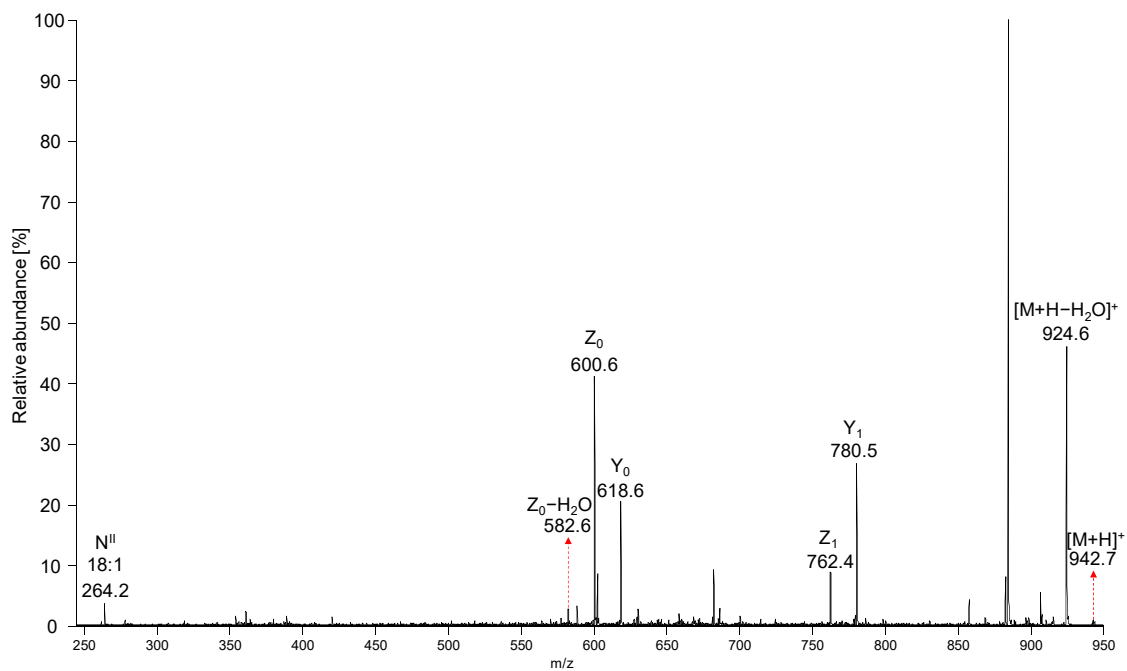

**Figure S23.** MS/MS spectrum of Hex<sub>2</sub>Cer 40:3 at m/z 942.7 with characteristic fragments.

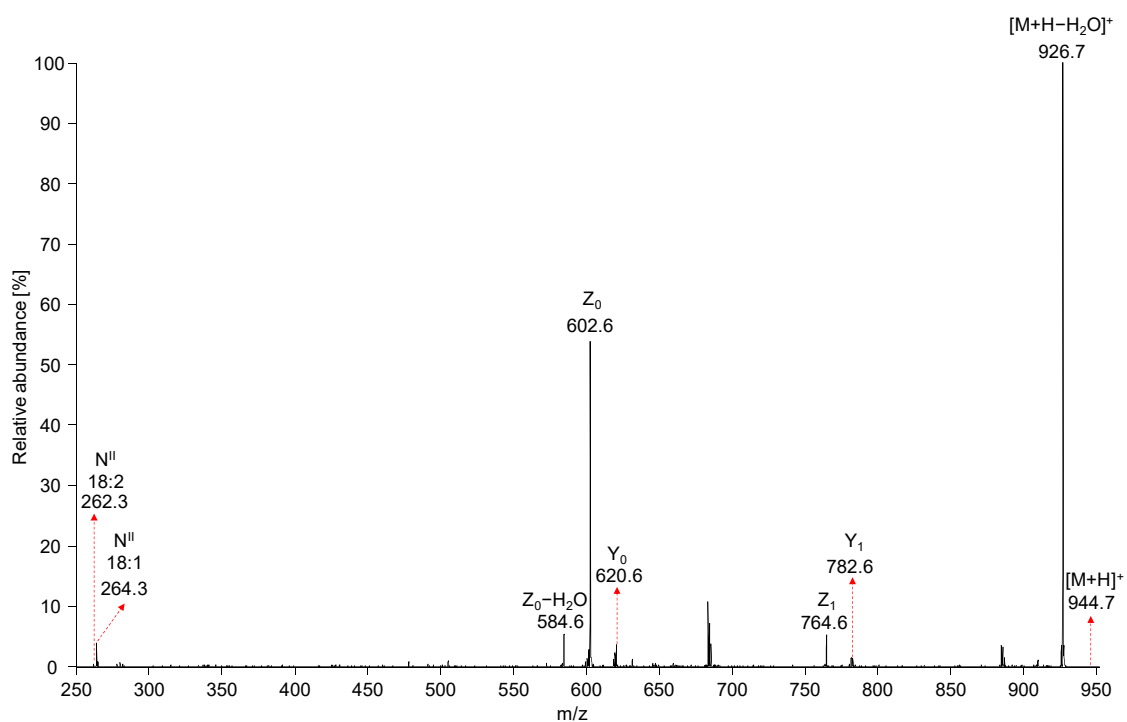

**Figure S24.** MS/MS spectrum of Hex<sub>2</sub>Cer 40:2 at  $m/z$  944.7 with characteristic fragments.

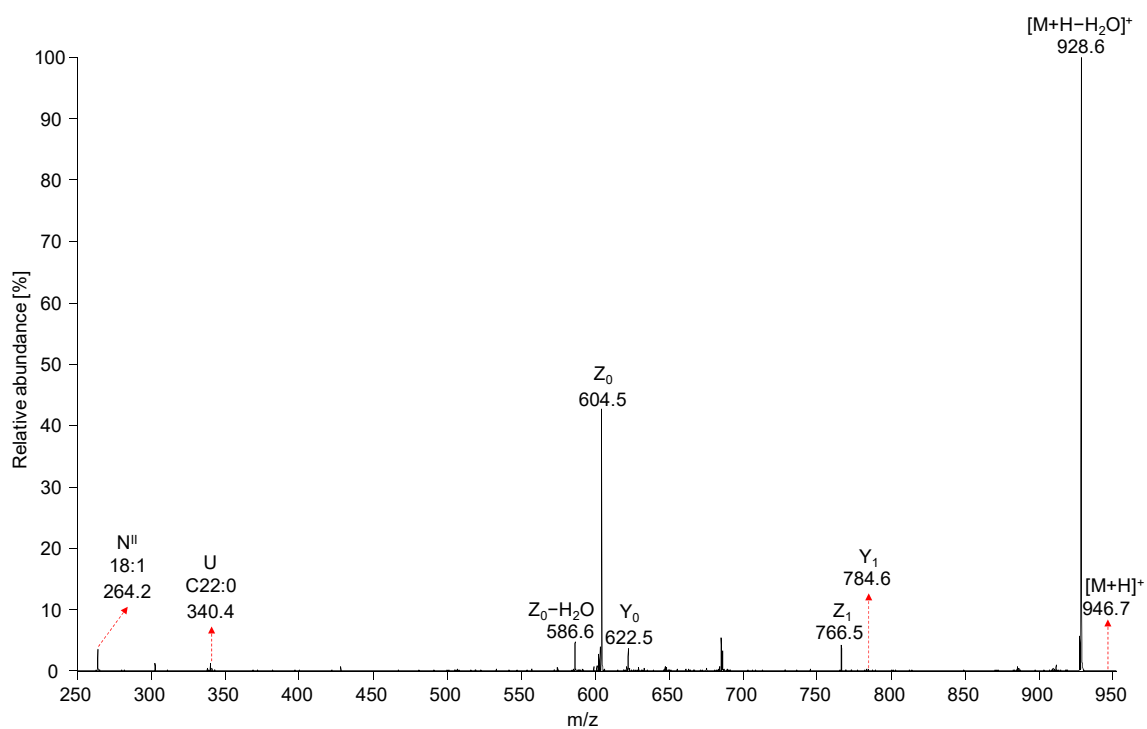

**Figure S25.** MS/MS spectrum of Hex<sub>2</sub>Cer 40:1 at  $m/z$  946.7 with characteristic fragments.

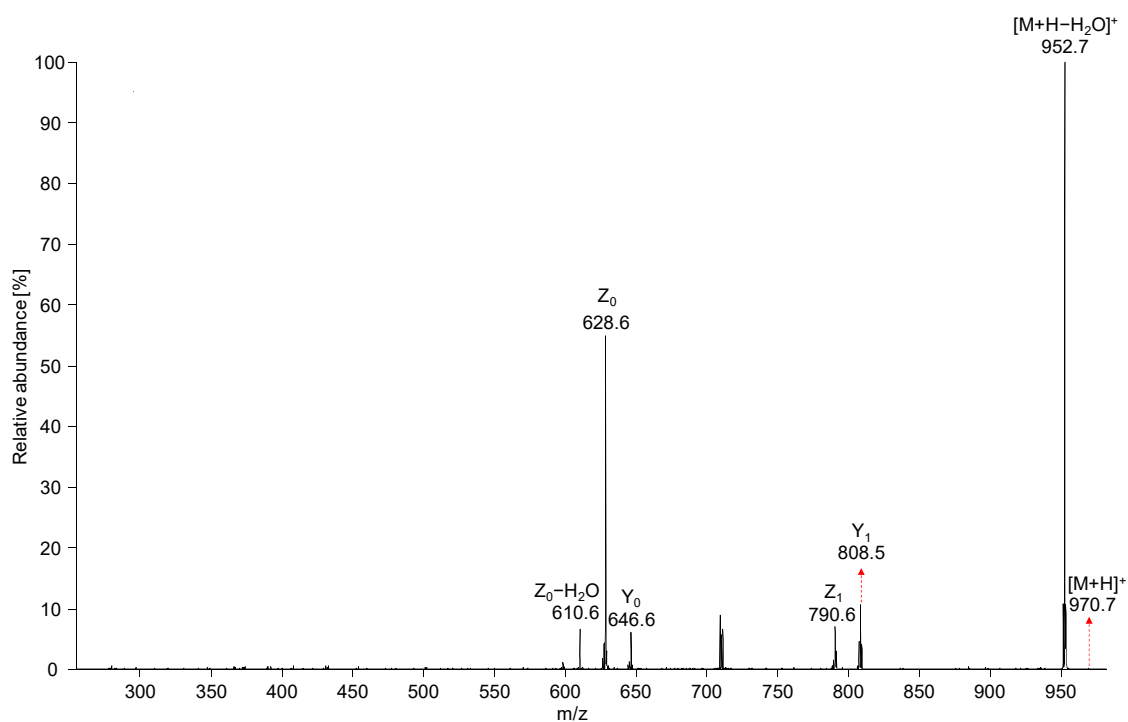

**Figure S26.** MS/MS spectrum of Hex<sub>2</sub>Cer 42:3 at  $m/z$  970.7 with characteristic fragments.

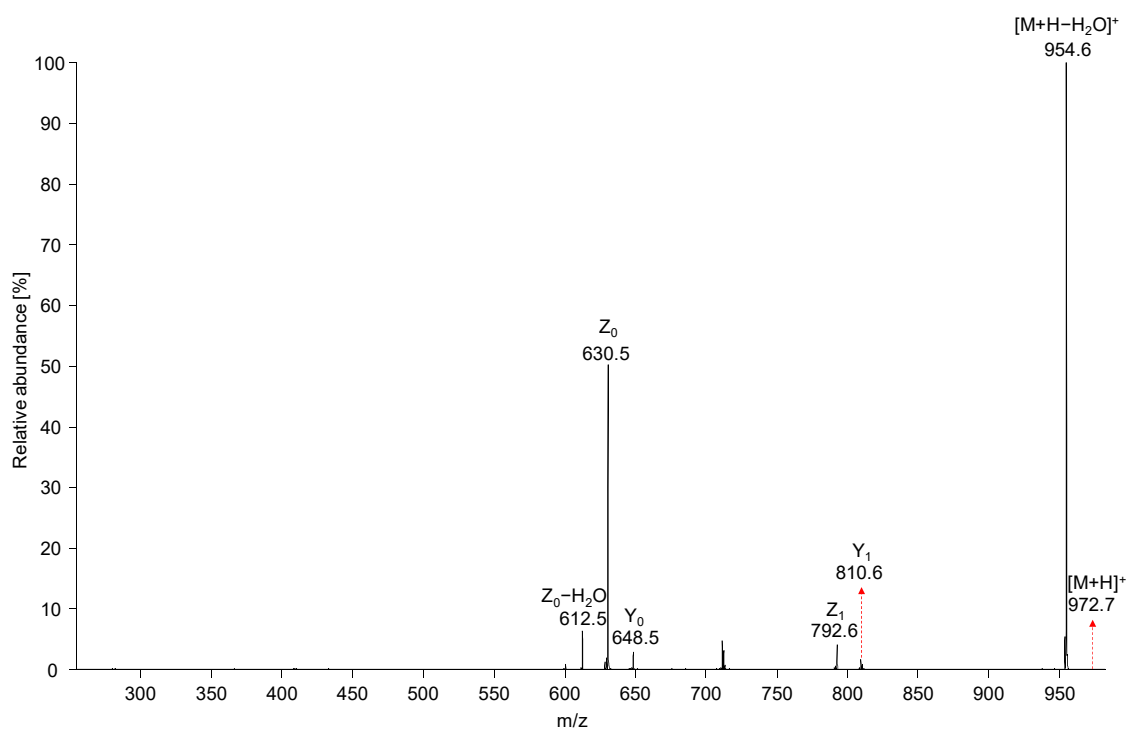

**Figure S27.** MS/MS spectrum of Hex<sub>2</sub>Cer 42:2 at  $m/z$  972.7 with characteristic fragments.

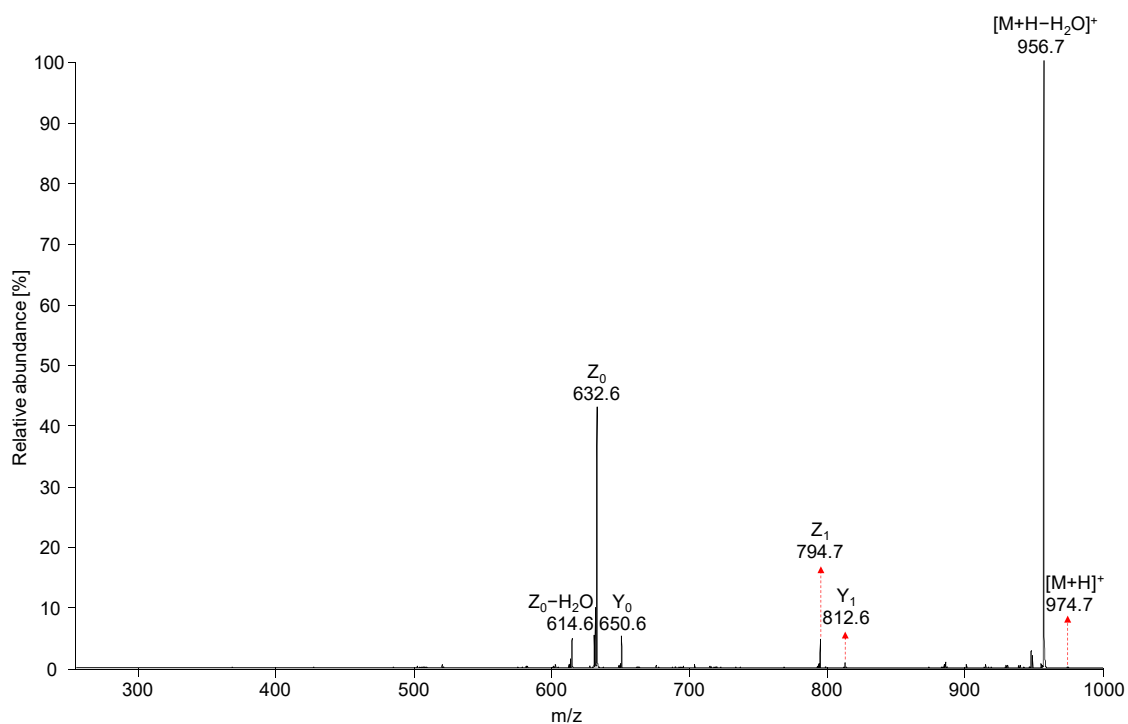

**Figure S28.** MS/MS spectrum of Hex<sub>2</sub>Cer 42:1 at  $m/z$  974.7 with characteristic fragments.

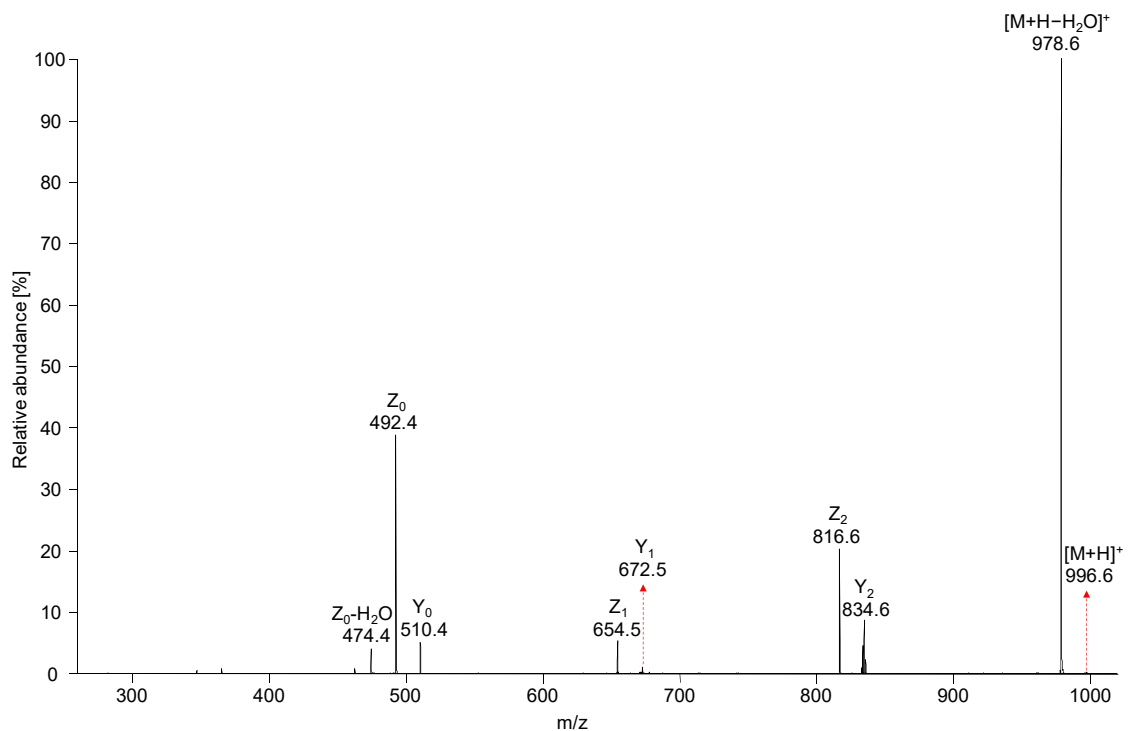

**Figure S29.** MS/MS spectrum of Gb<sub>3</sub> 32:1 at  $m/z$  996.6 with characteristic fragments.

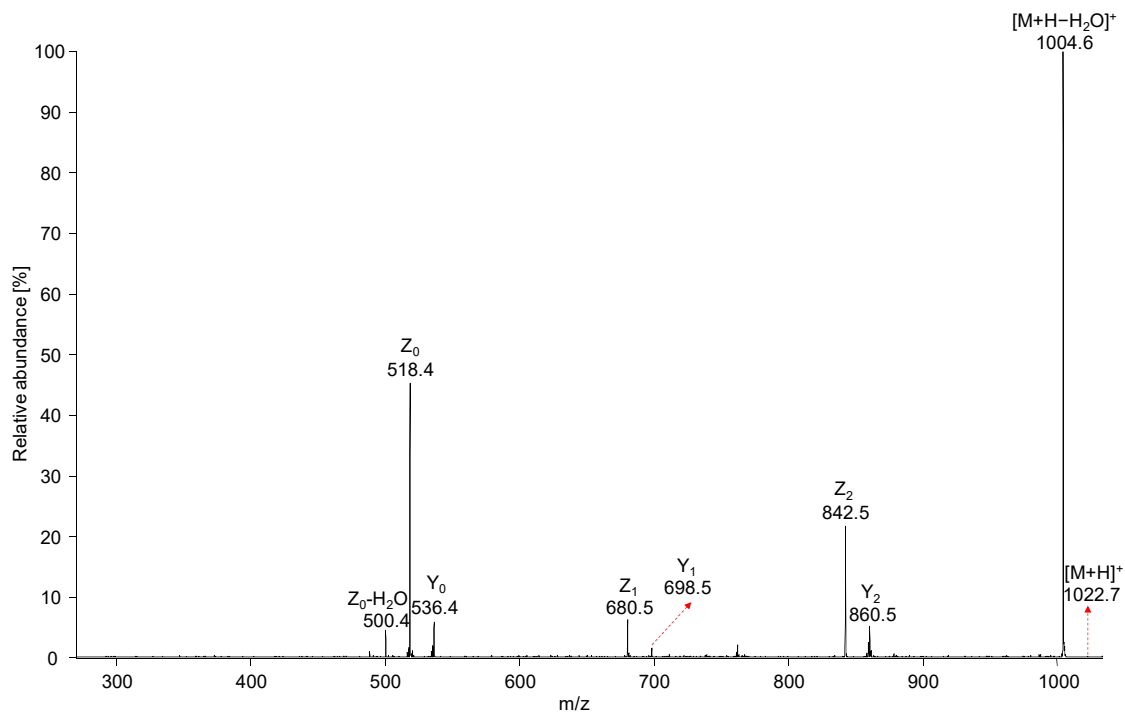

**Figure S30.** MS/MS spectrum of Gb<sub>3</sub> 34:2 at  $m/z$  1022.7 with characteristic fragments.

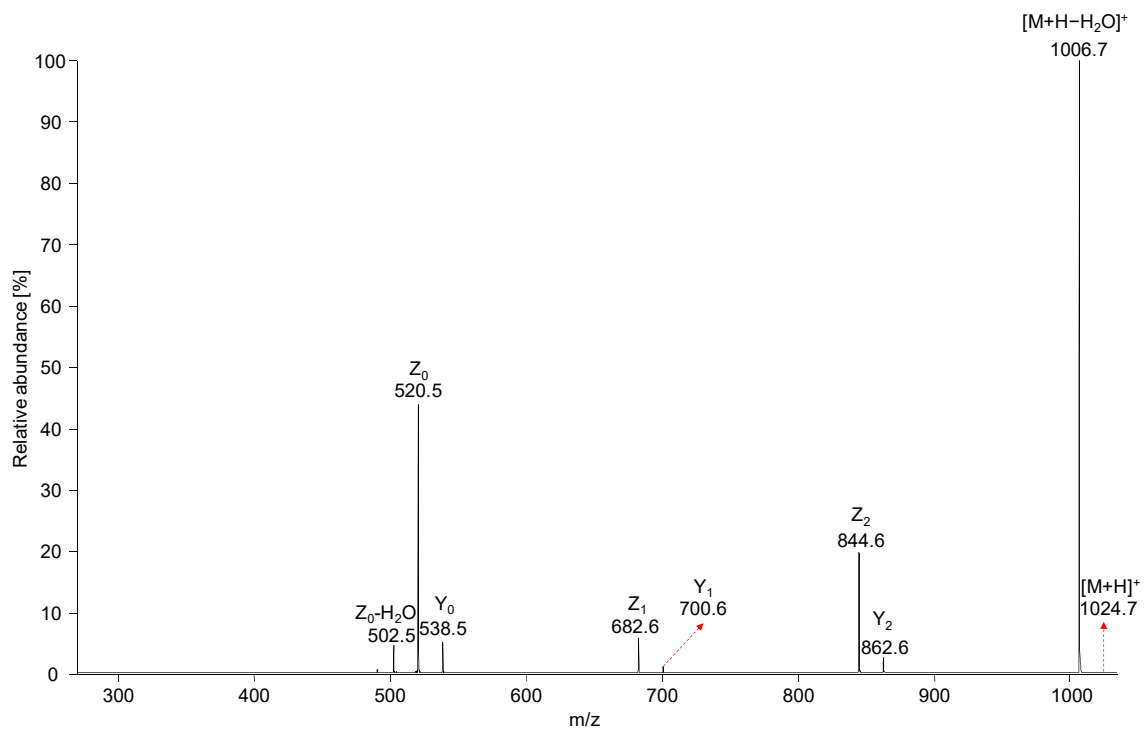

**Figure S31.** MS/MS spectrum of Gb<sub>3</sub> 34:1 at  $m/z$  1024.7 with characteristic fragments.

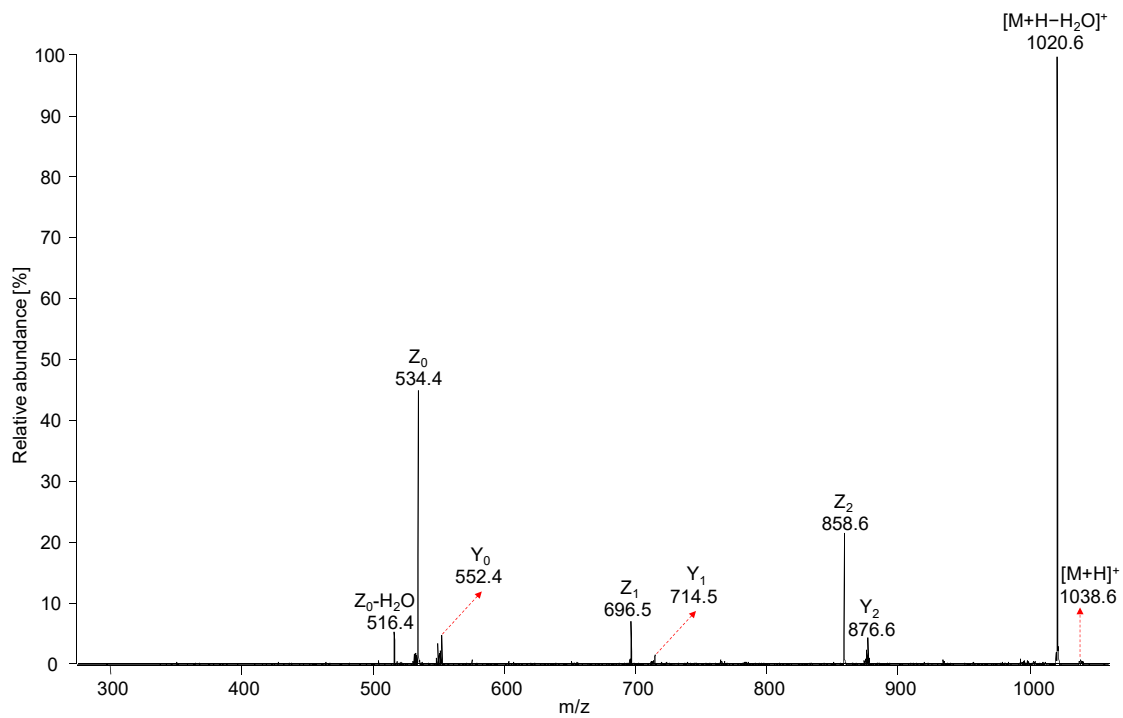

**Figure S32.** MS/MS spectrum of Gb<sub>3</sub> 34:2 OH and/or 35:1 at  $m/z$  1038.6 with characteristic fragments.

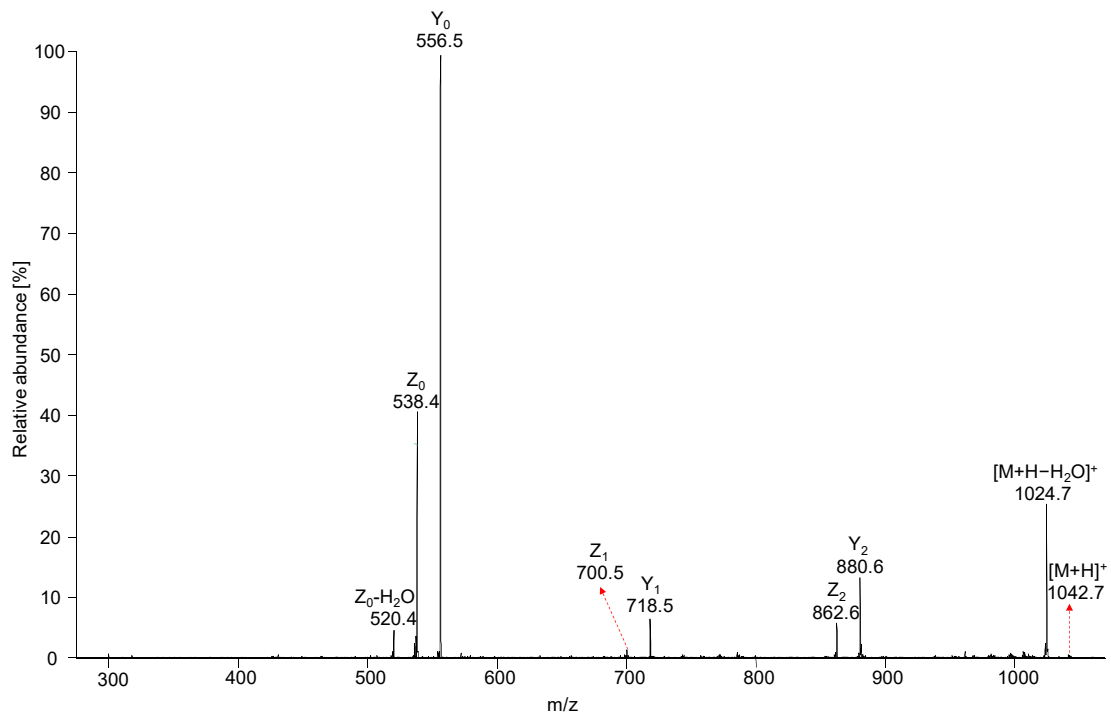

**Figure S33.** MS/MS spectrum of Gb<sub>3</sub> 34:0 OH at  $m/z$  1042.7 with characteristic fragments.

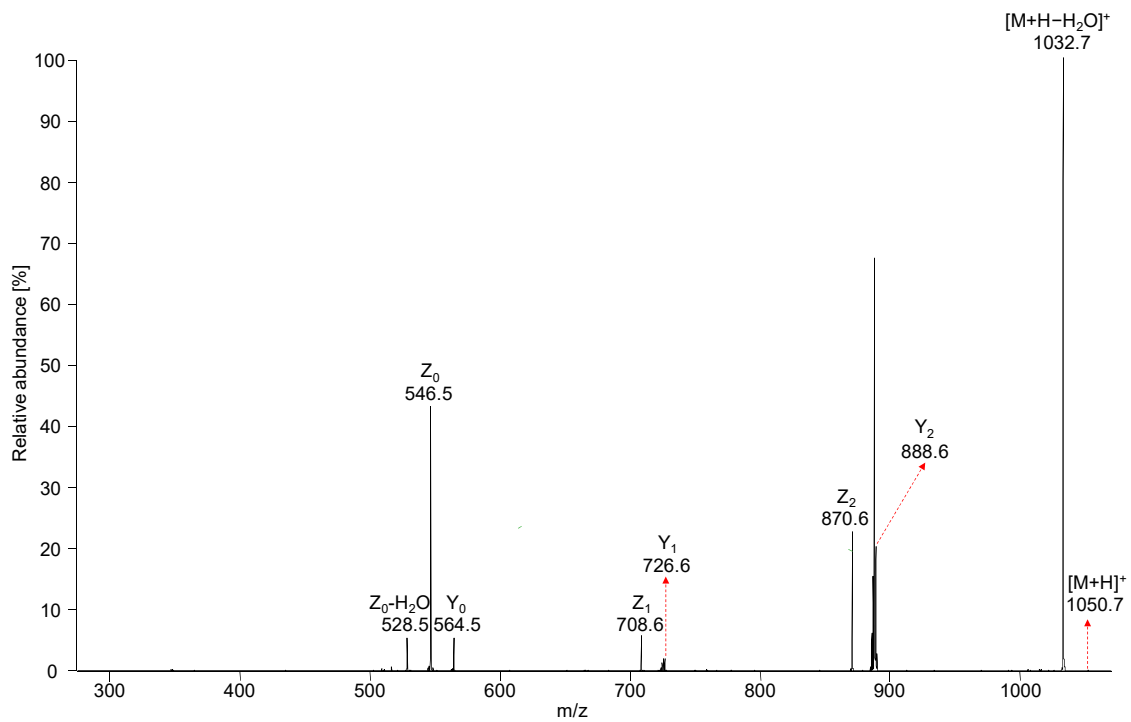

**Figure S34.** MS/MS spectrum of Gb<sub>3</sub> 36:2 at  $m/z$  1050.7 with characteristic fragments.

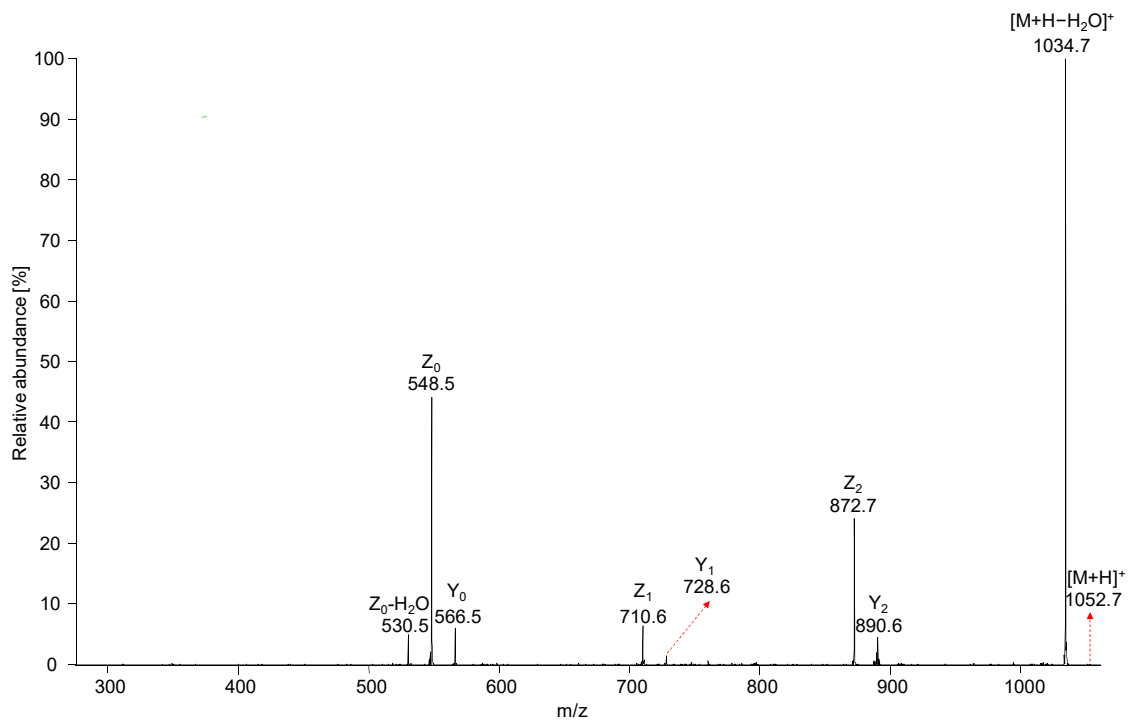

**Figure S35.** MS/MS spectrum of Gb<sub>3</sub> 36:1 at  $m/z$  1052.7 with characteristic fragments.



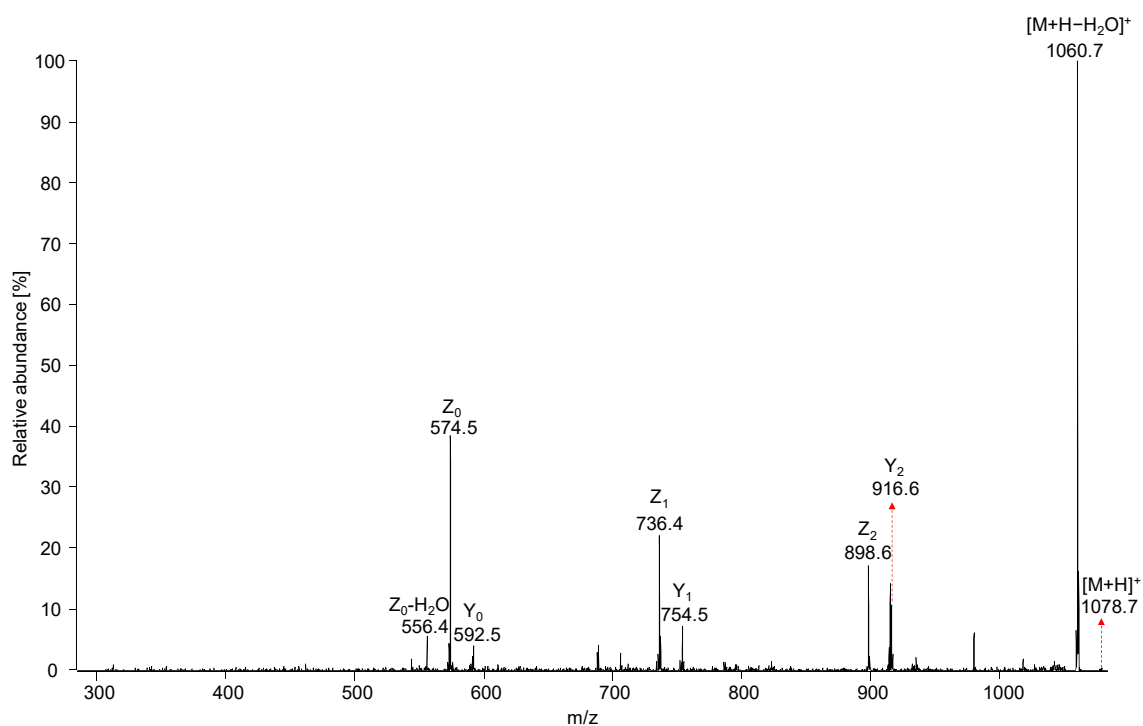

**Figure S36.** MS/MS spectrum of Gb<sub>3</sub> 38:2 at  $m/z$  1078.7 with characteristic fragments.

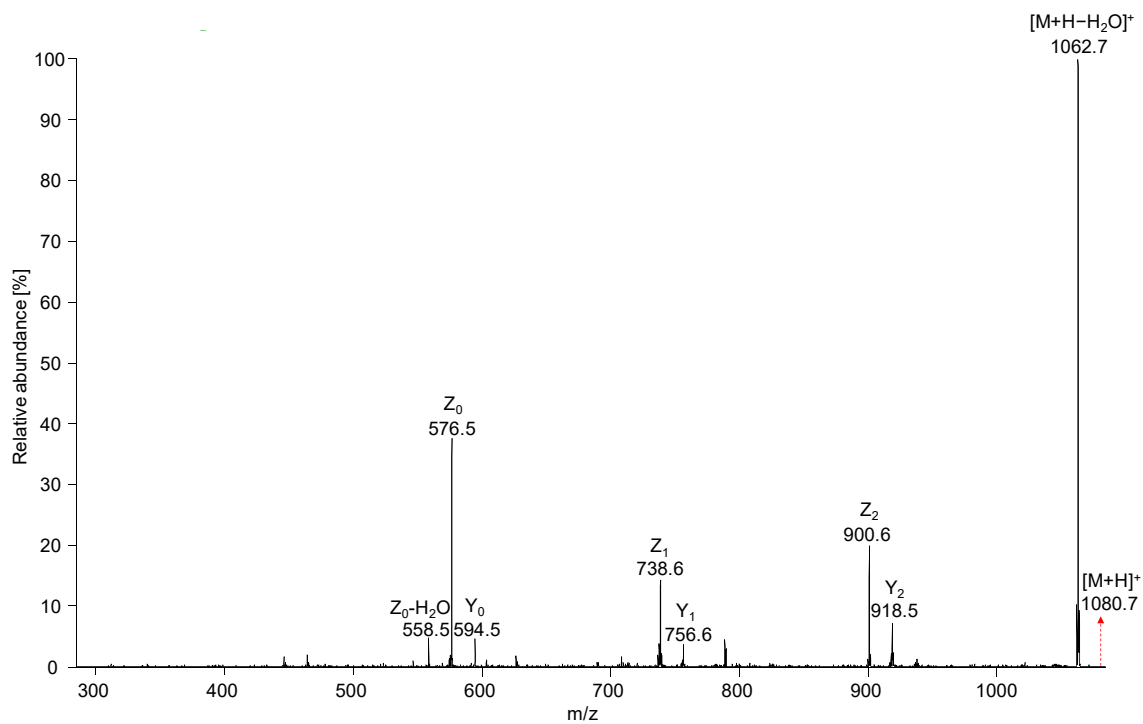

**Figure S37.** MS/MS spectrum of Gb<sub>3</sub> 38:1 at  $m/z$  1080.7 with characteristic fragments.

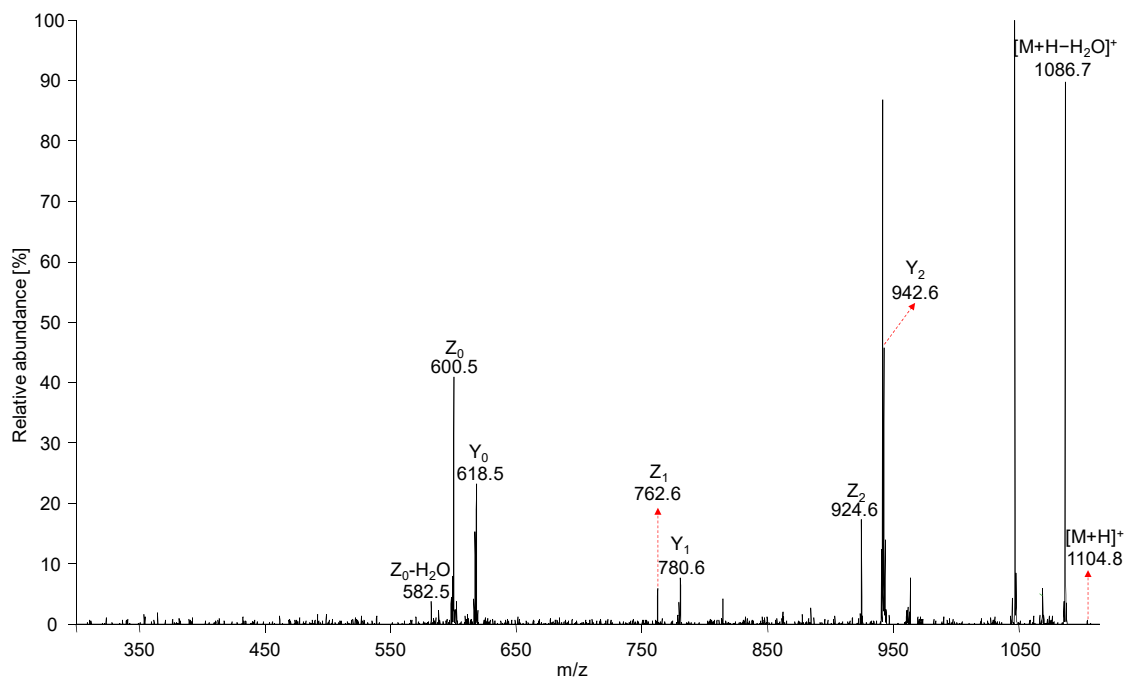

**Figure S38.** MS/MS spectrum of Gb<sub>3</sub> 40:3 at  $m/z$  1104.8 with characteristic fragments.

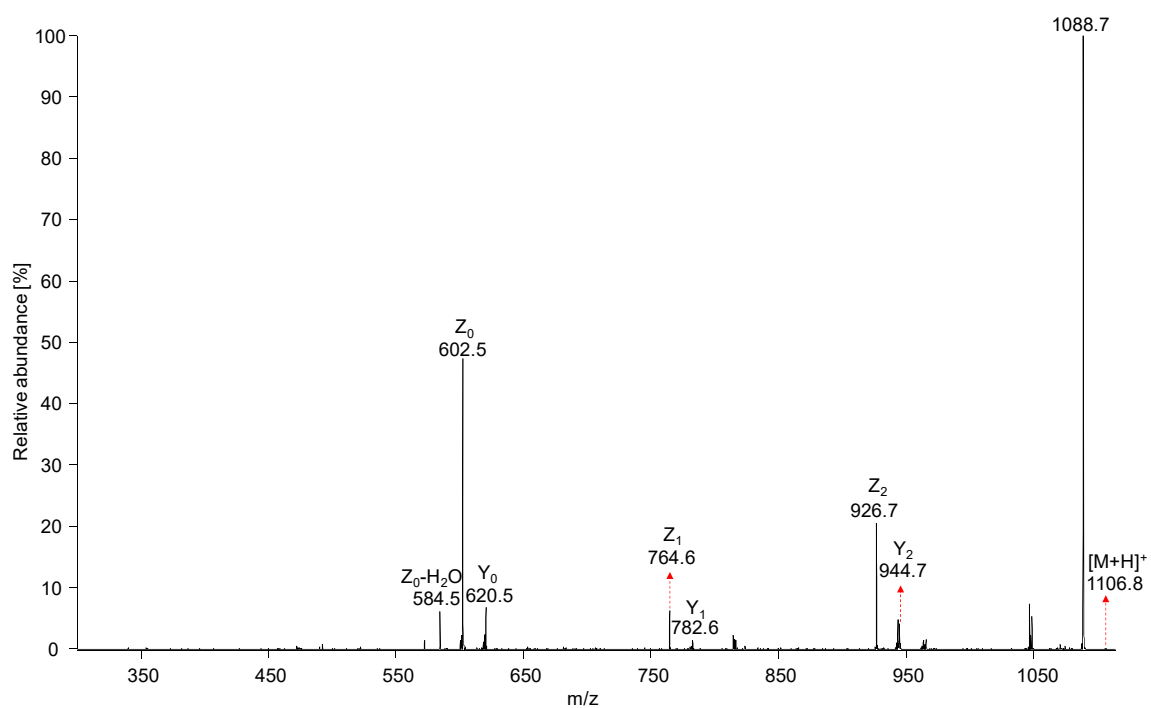

**Figure S39.** MS/MS spectrum of Gb<sub>3</sub> 40:2 at  $m/z$  1106.8 with characteristic fragments.

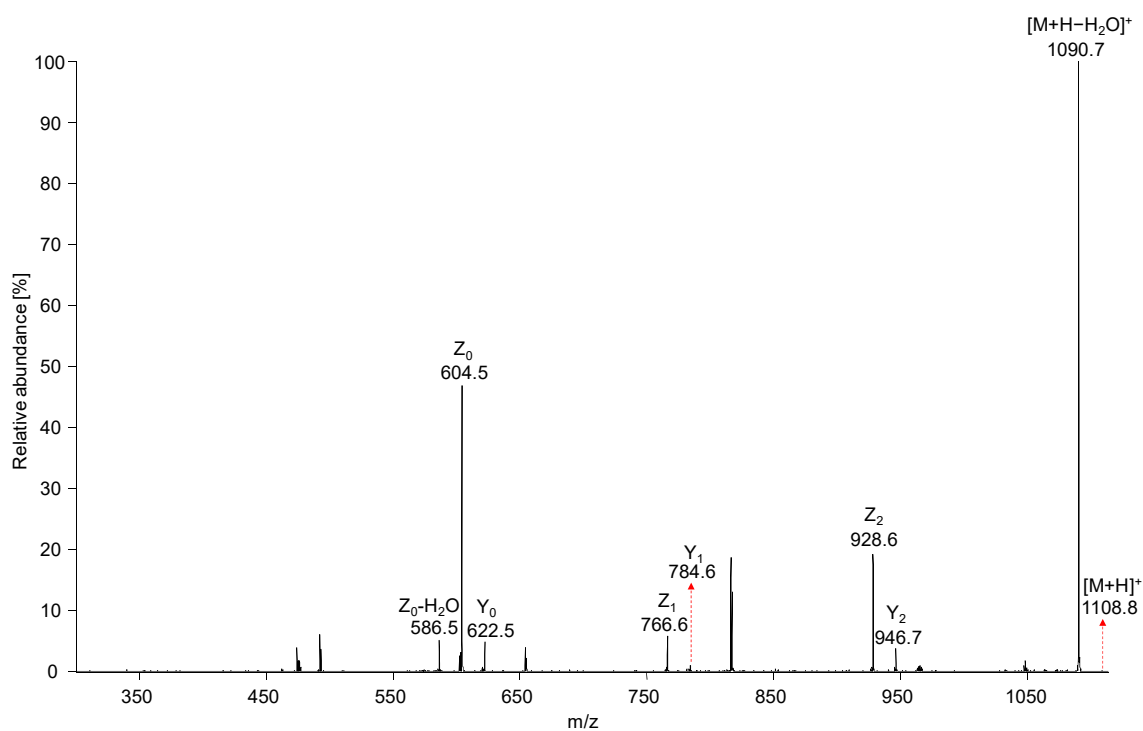

**Figure S40.** MS/MS spectrum of Gb<sub>3</sub> 40:1 at  $m/z$  1108.8 with characteristic fragments.

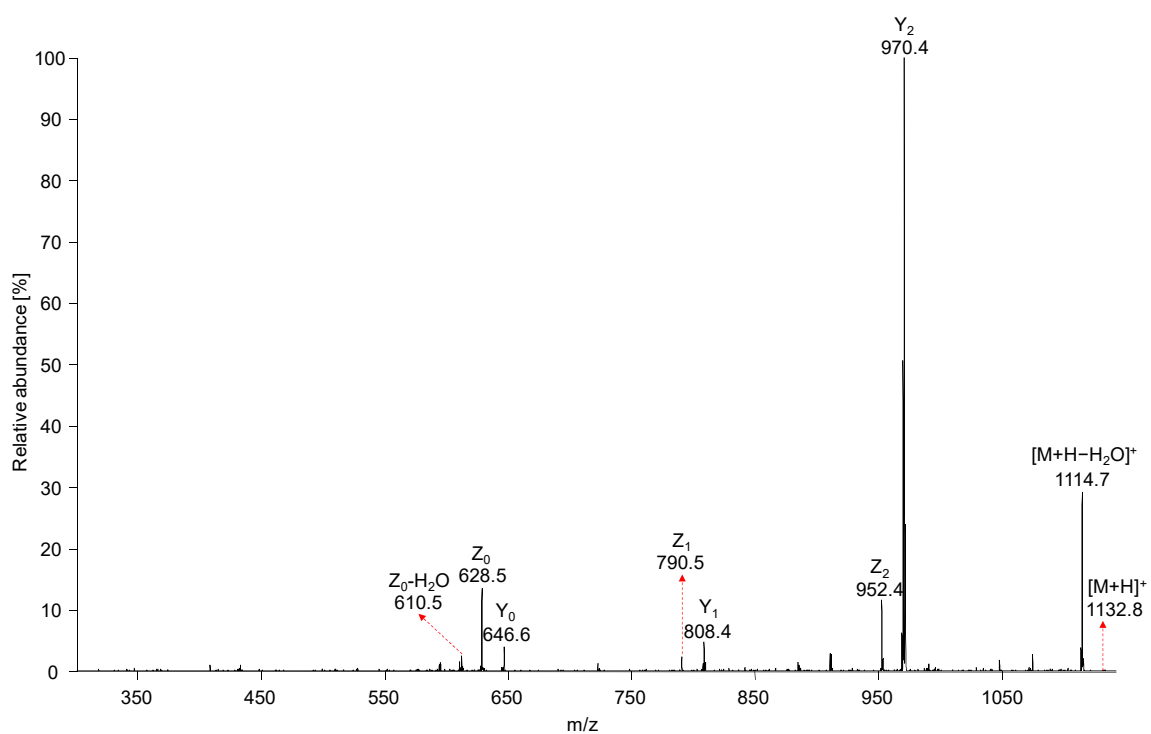

**Figure S41.** MS/MS spectrum of Gb<sub>3</sub> 42:3 at  $m/z$  1132.8 with characteristic fragments.

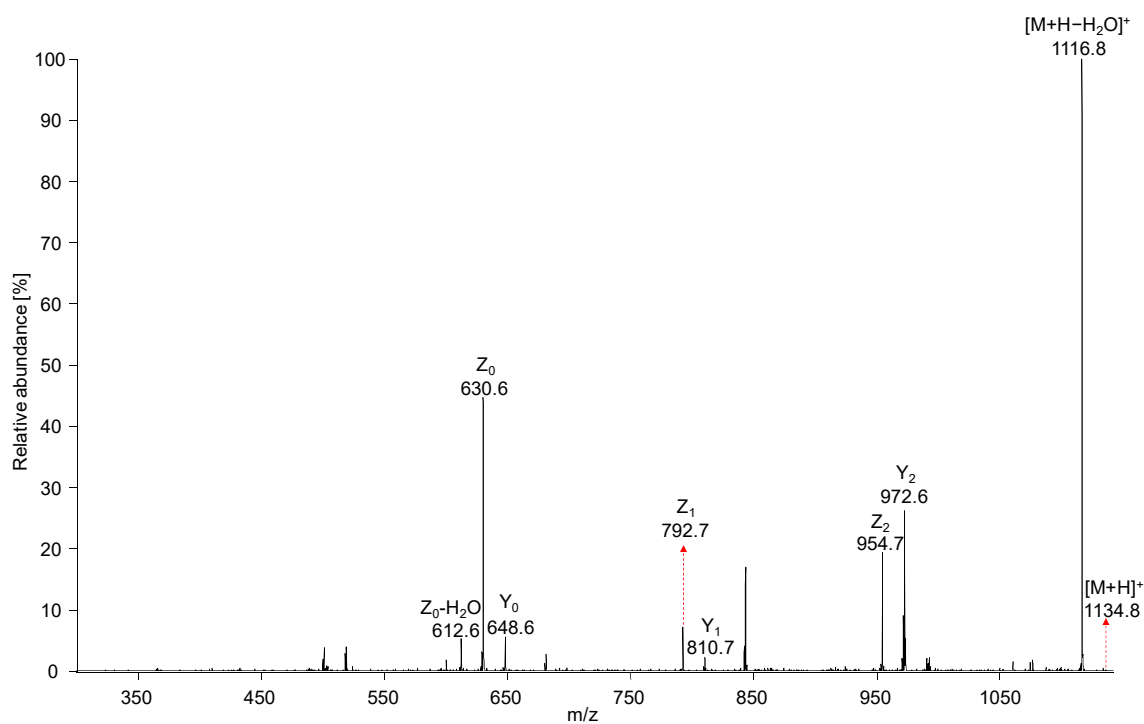

**Figure S42.** MS/MS spectrum of Gb<sub>3</sub> 42:2 at  $m/z$  1134.8 with characteristic fragments.

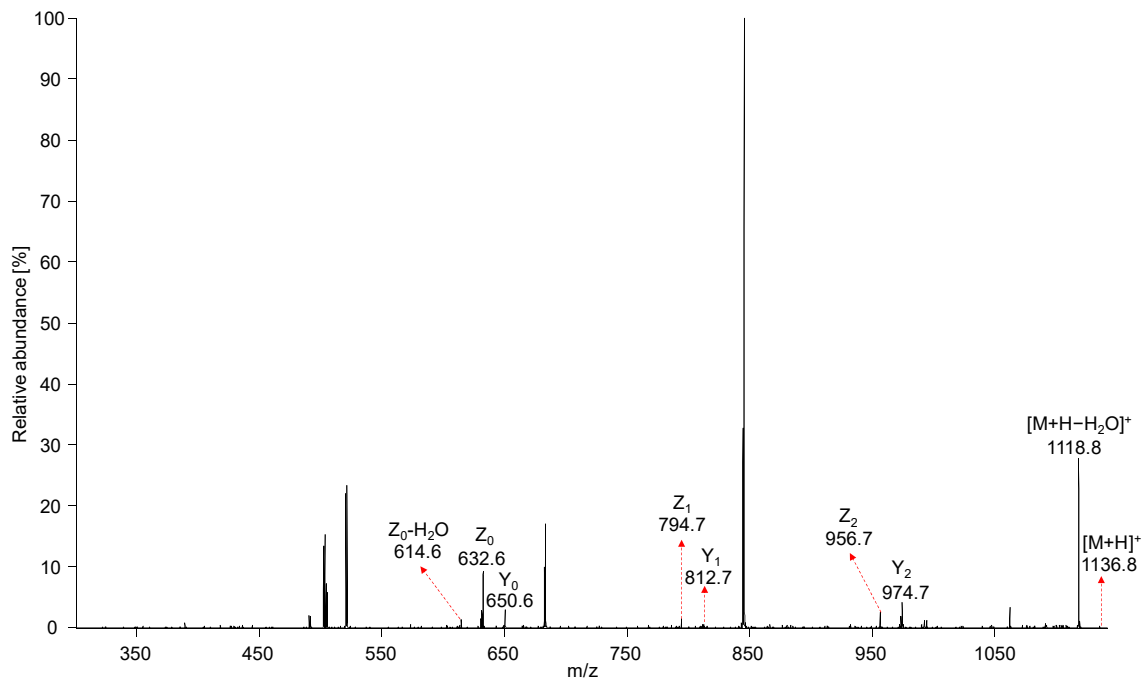

**Figure S43.** MS/MS spectrum of Gb<sub>3</sub> 42:1 at  $m/z$  1136.8 with characteristic fragments.

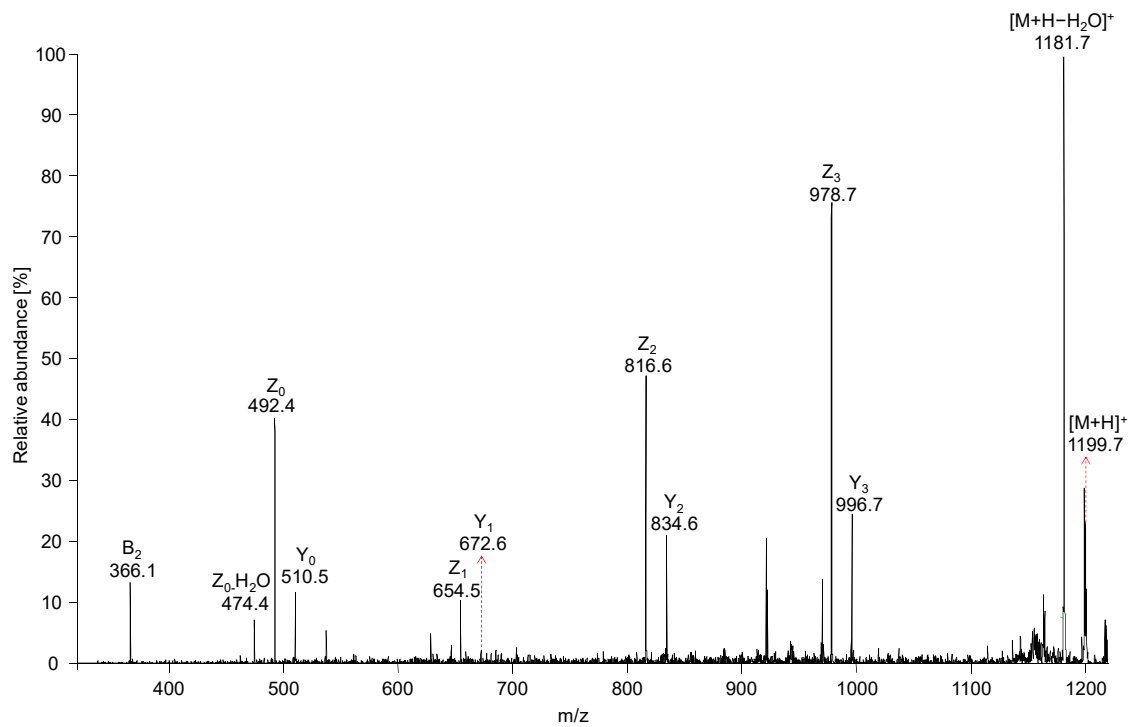

**Figure S44.** MS/MS spectrum of Gb<sub>4</sub> 32:1 at *m/z* 1199.7 with characteristic fragments.

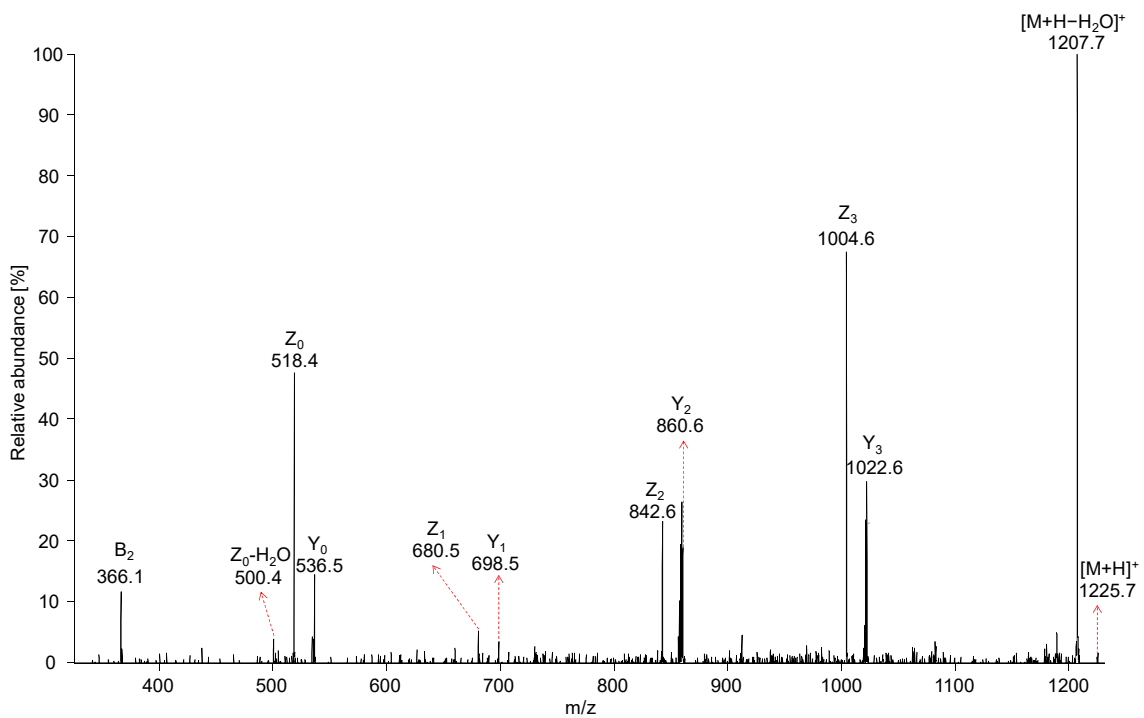

**Figure S45.** MS/MS spectrum of Gb<sub>4</sub> 34:2 at *m/z* 1225.7 with characteristic fragments.

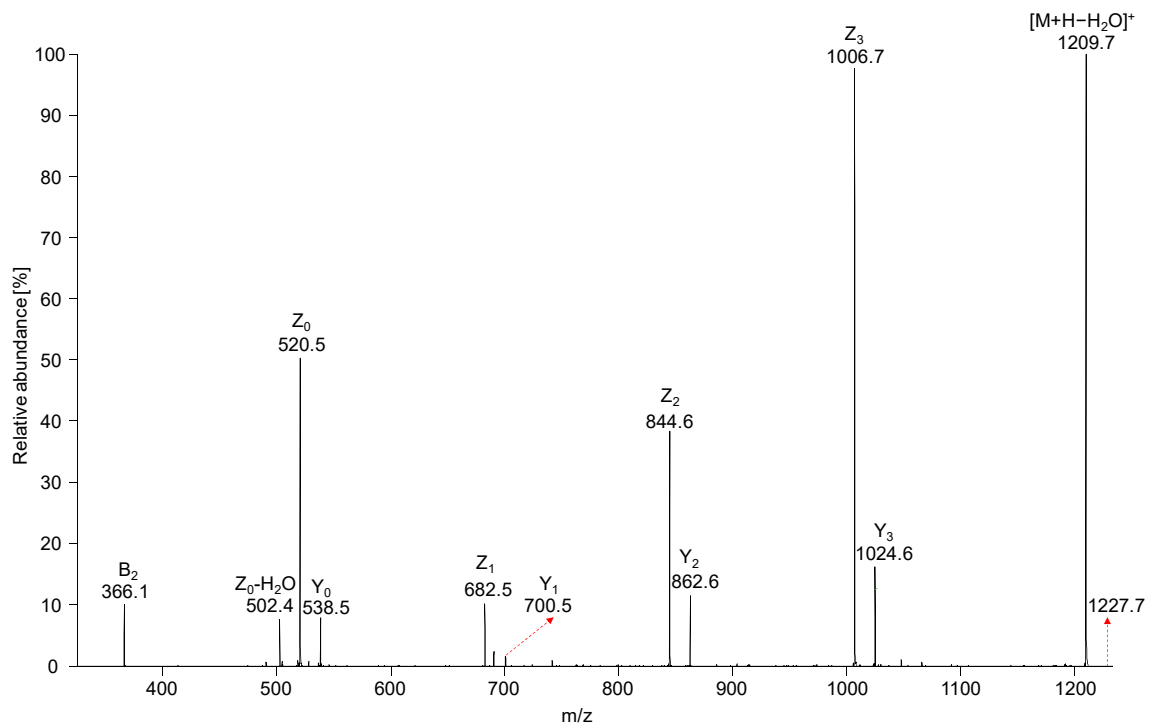

**Figure S46.** MS/MS spectrum of Gb<sub>4</sub> 34:1 at  $m/z$  1227.7 with characteristic fragments.

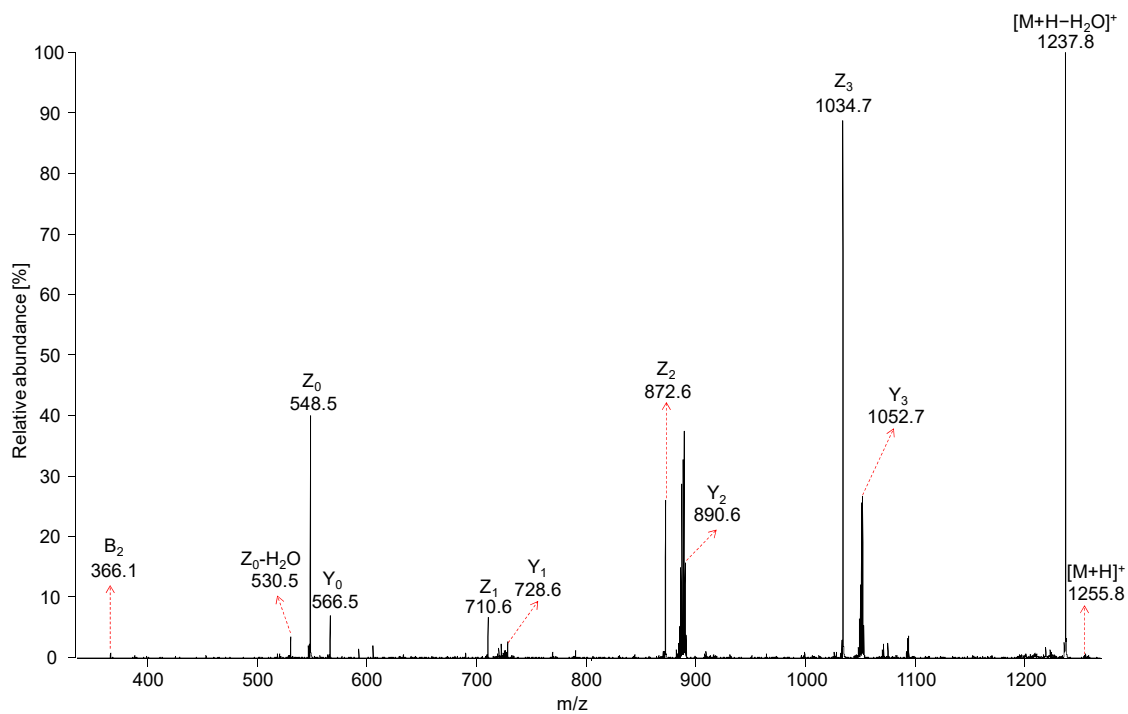

**Figure S47.** MS/MS spectrum of Gb<sub>4</sub> 36:1 at  $m/z$  1255.8 with characteristic fragments.

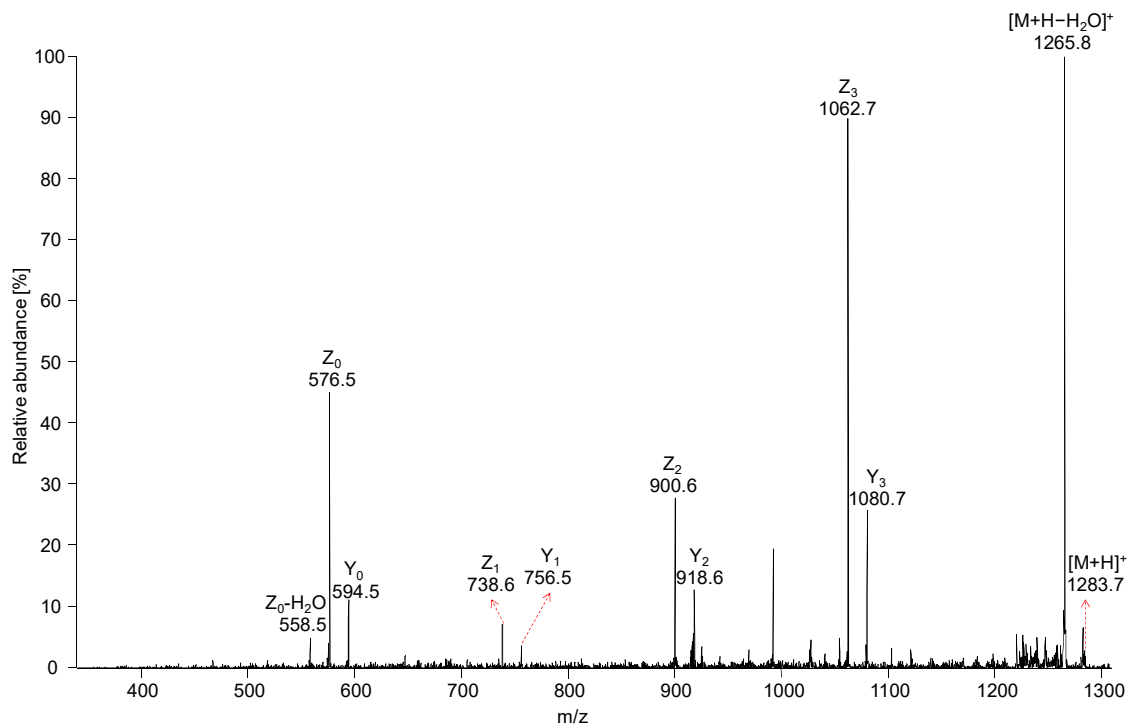

**Figure S48.** MS/MS spectrum of Gb4 38:1 at  $m/z$  1283.7 with characteristic fragments.

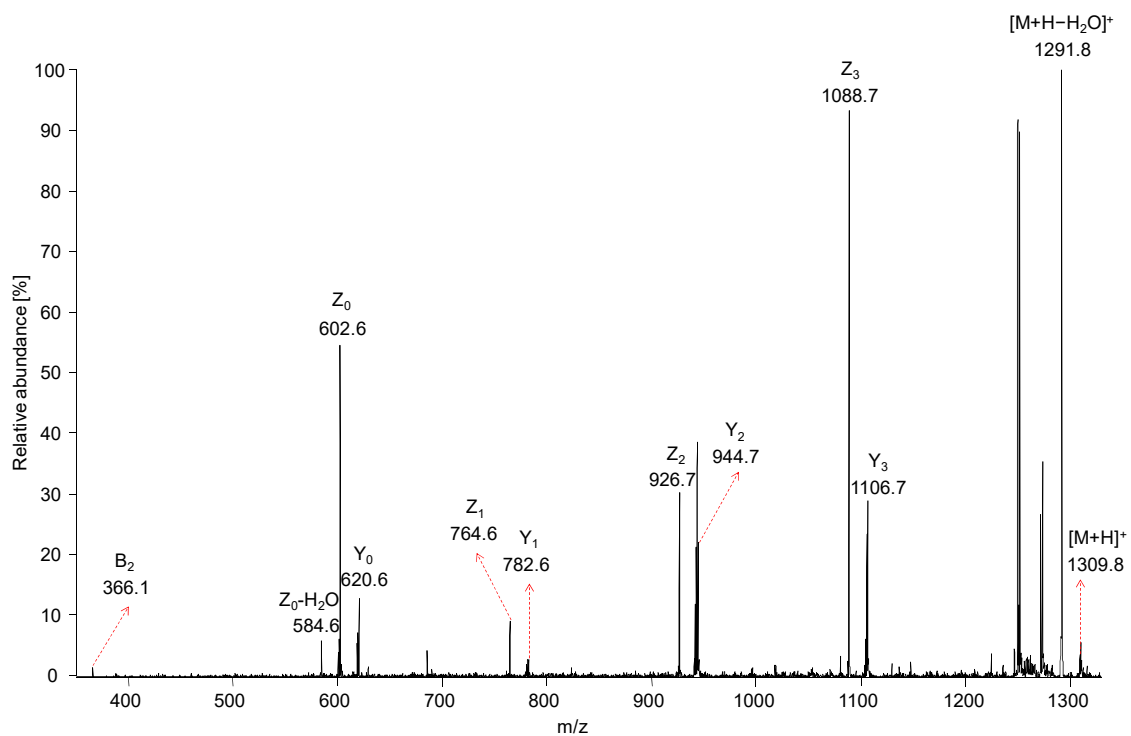

**Figure S49.** MS/MS spectrum of Gb4 40:2 at  $m/z$  1309.8 with characteristic fragments.

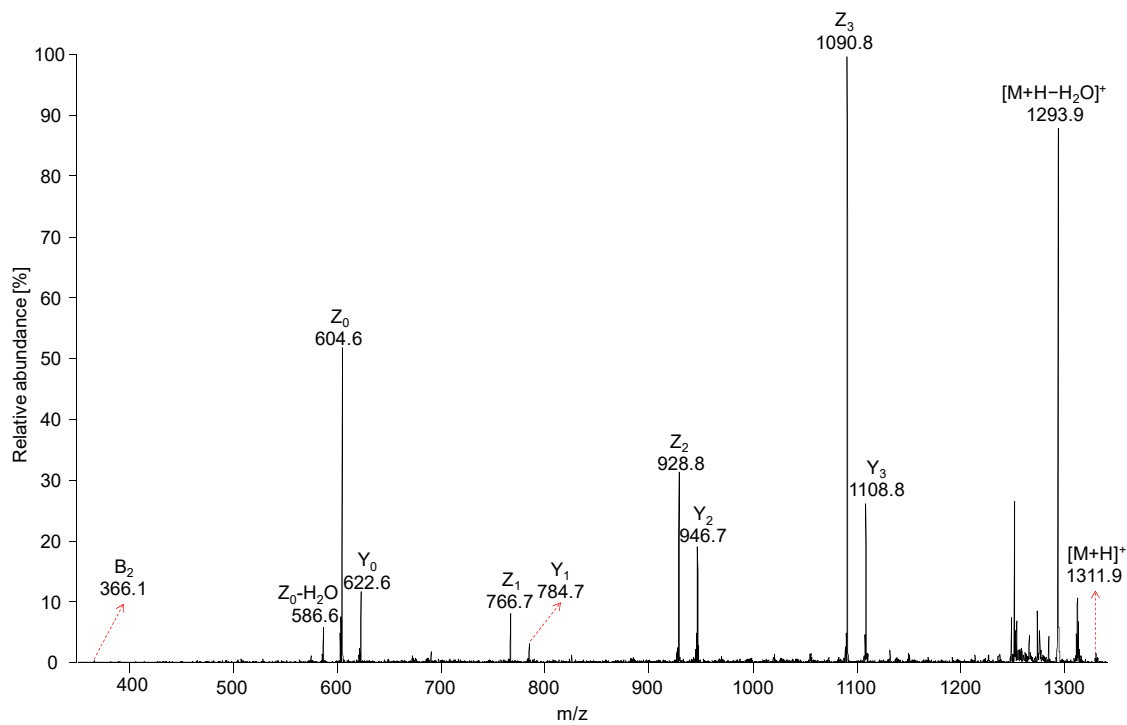

**Figure S50.** MS/MS spectrum of Gb<sub>4</sub> 40:1 at  $m/z$  1311.9 with characteristic fragments.

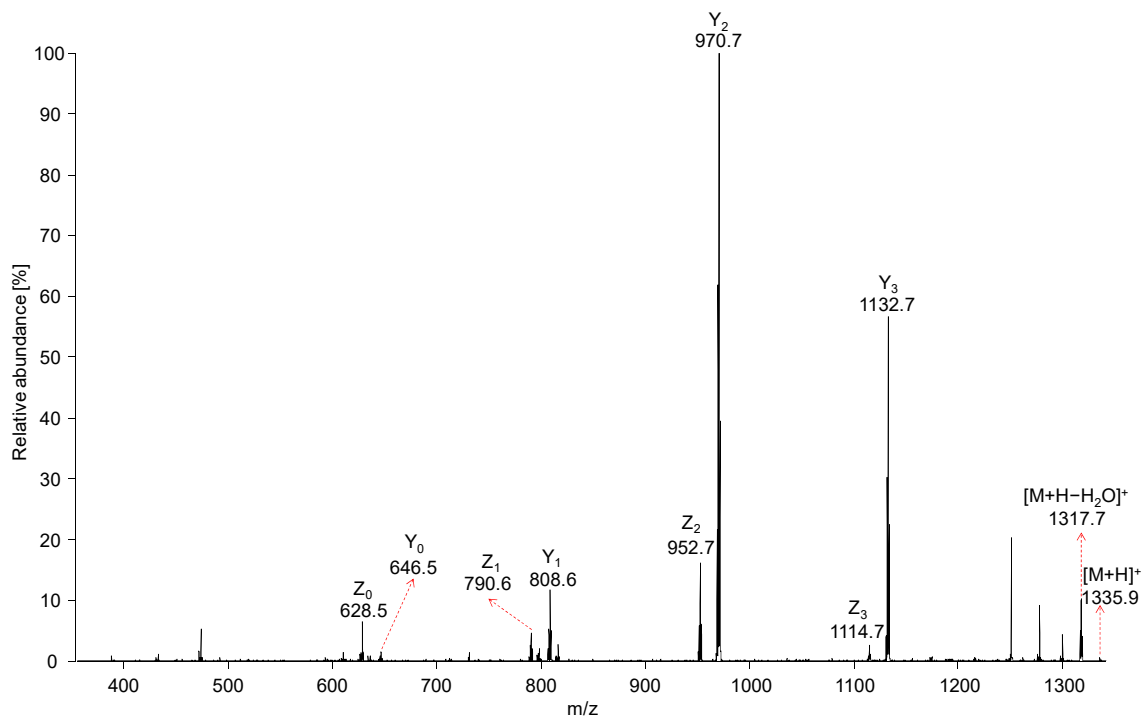

**Figure S51.** MS/MS spectrum of Gb<sub>4</sub> 42:3 at  $m/z$  1335.9 with characteristic fragments.



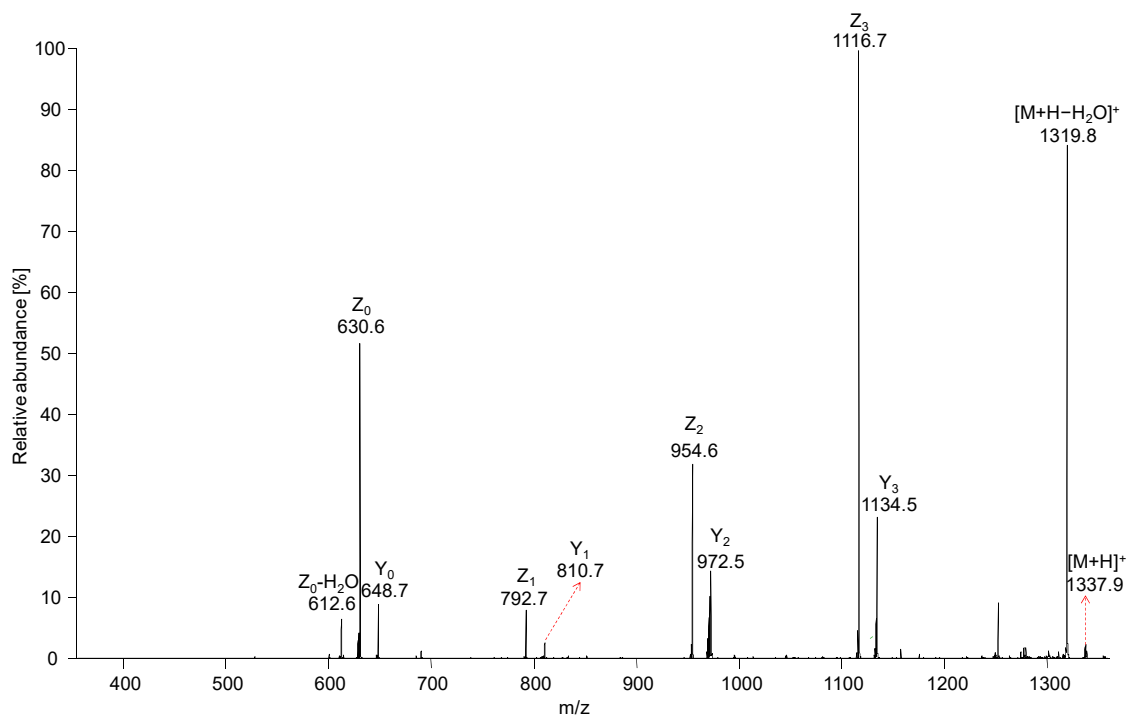

**Figure S52.** MS/MS spectrum of Gb<sub>4</sub> 42:2 at *m/z* 1337.9 with characteristic fragments.

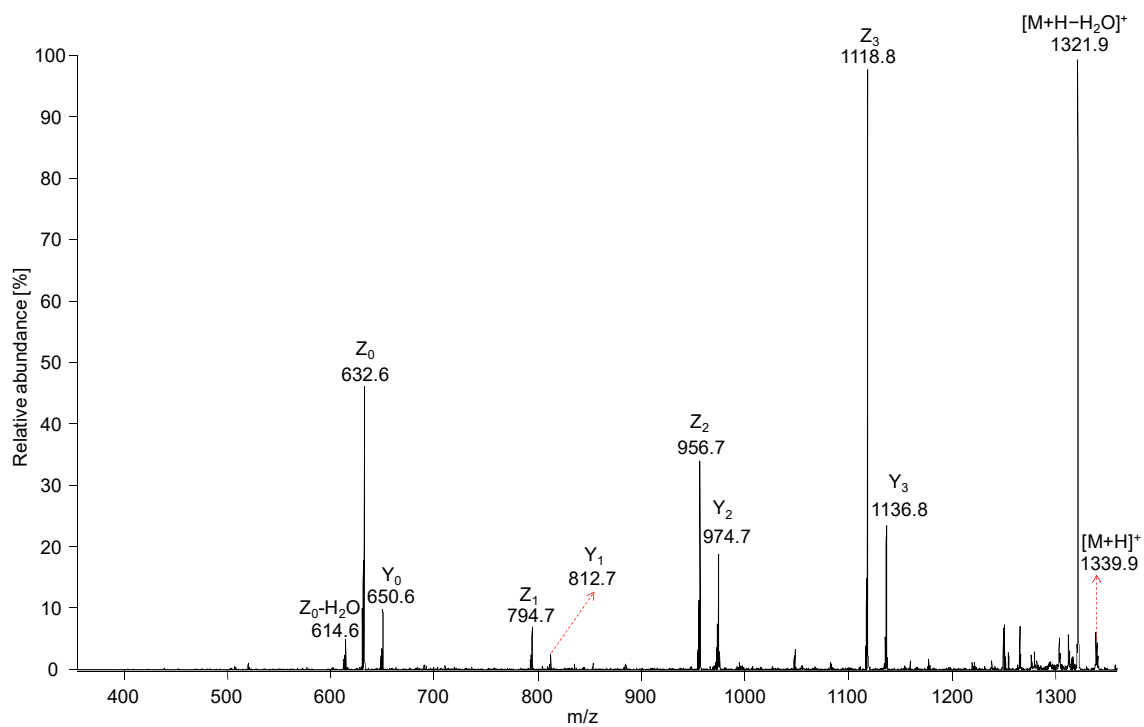

**Figure S53.** MS/MS spectrum of Gb<sub>4</sub> 42:1 at *m/z* 1339.9 with characteristic fragments.

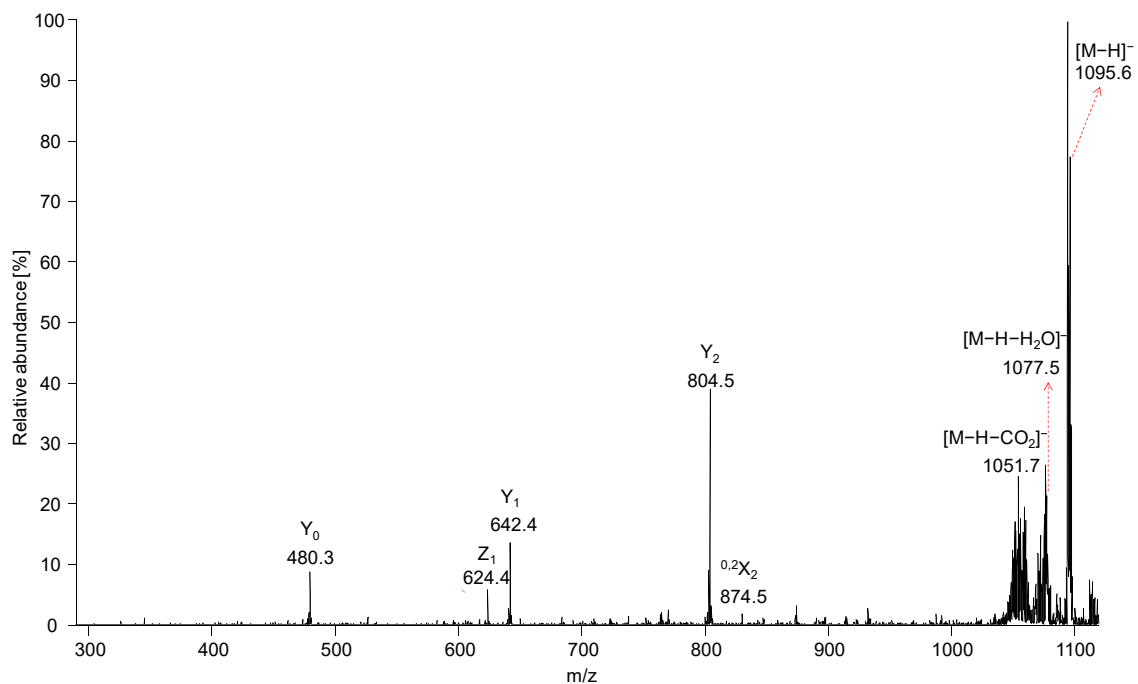

**Figure S54.** MS/MS spectrum of GM<sub>3</sub> 30:1 at  $m/z$  1095.6 with characteristic fragments.

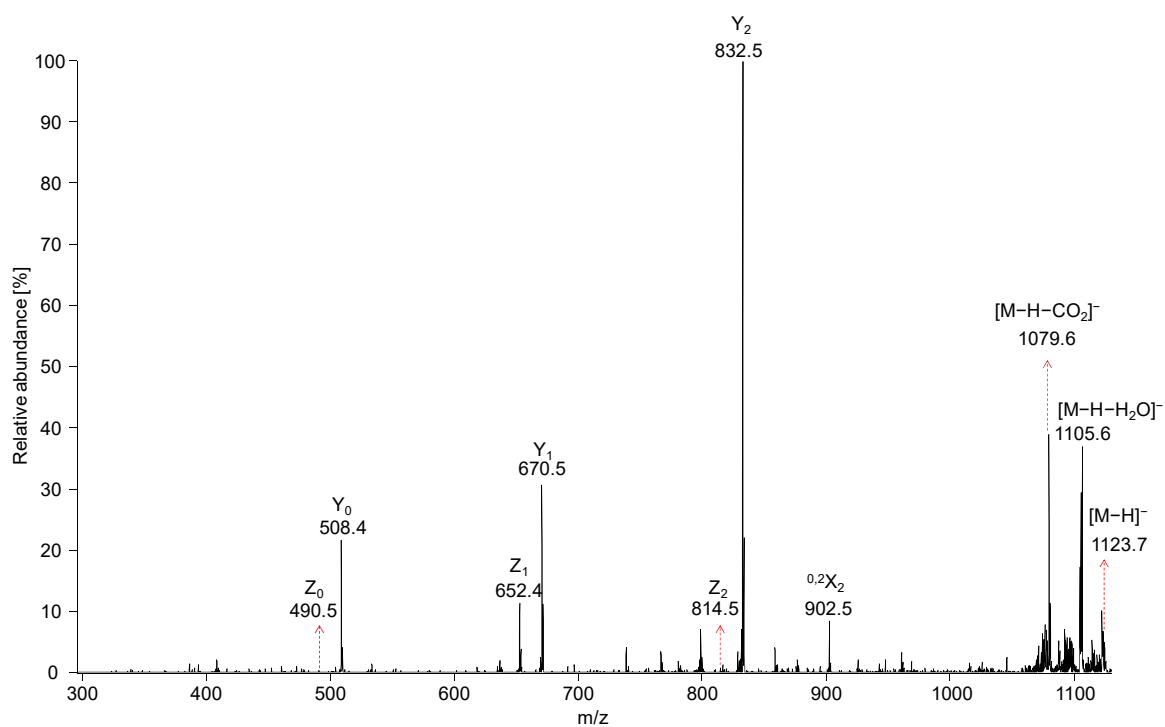

**Figure S55.** MS/MS spectrum of GM<sub>3</sub> 32:1 at  $m/z$  1123.7 with characteristic fragments.

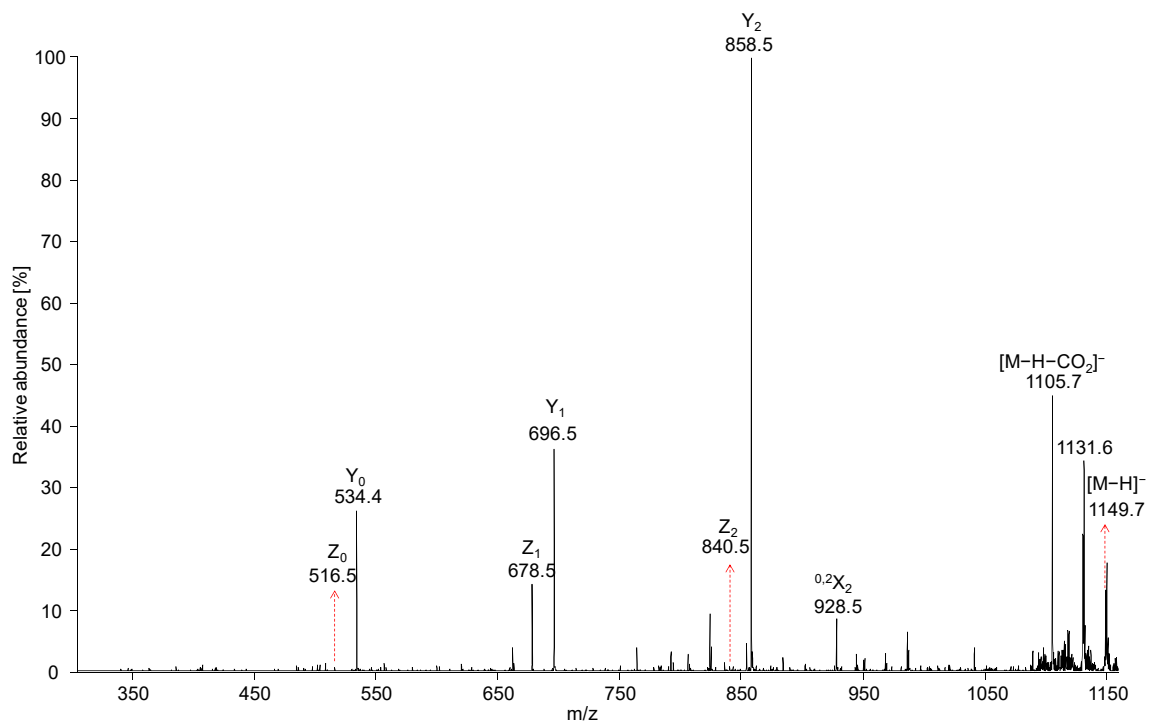

**Figure S56.** MS/MS spectrum of GM<sub>3</sub> 34:2 at  $m/z$  1149.7 with characteristic fragments.

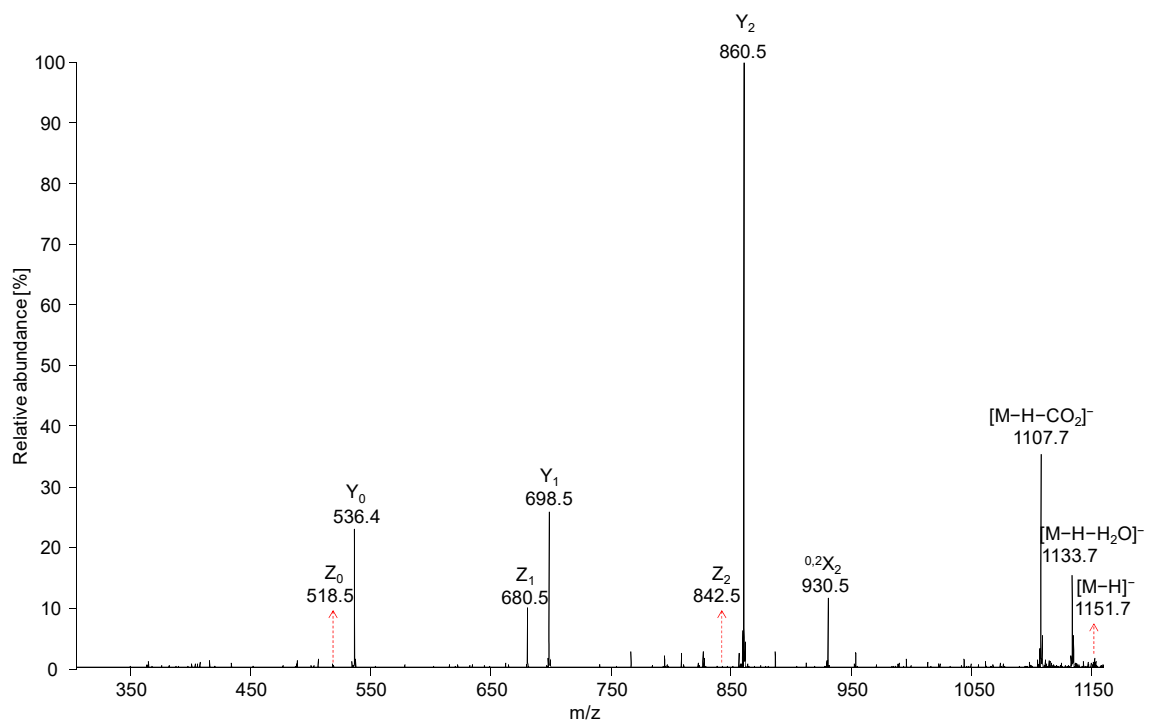

**Figure S57.** MS/MS spectrum of GM<sub>3</sub> 34:1 at  $m/z$  1151.7 with characteristic fragments.

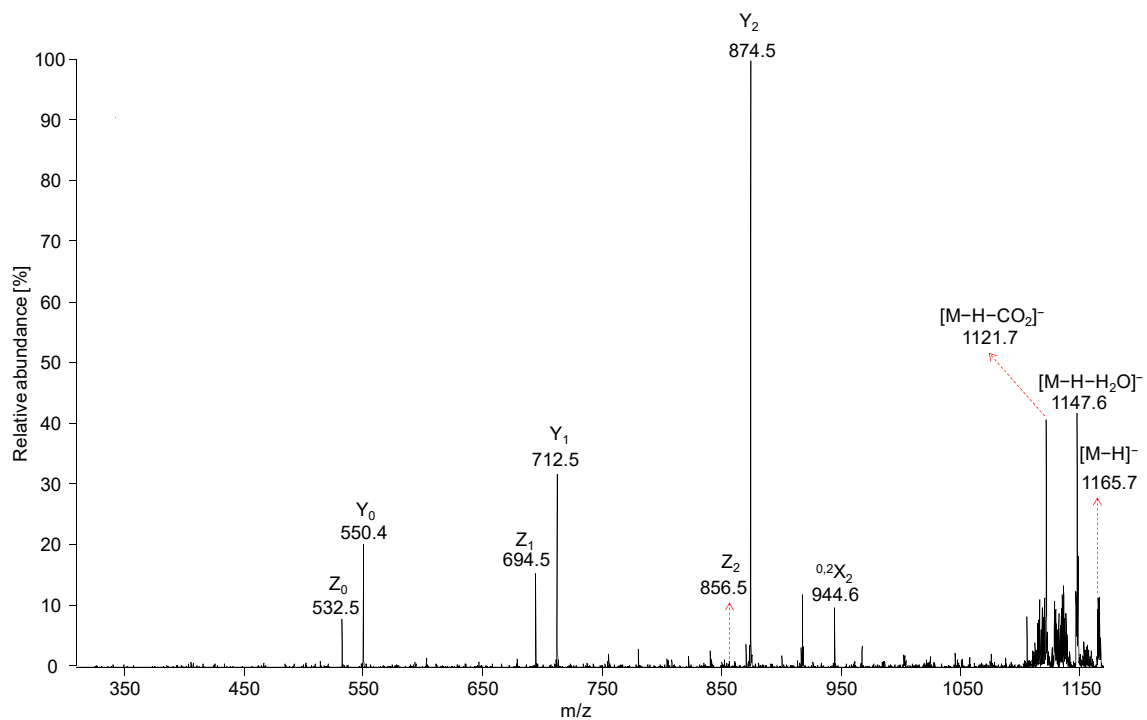

**Figure S58.** MS/MS spectrum of GM<sub>3</sub> 34:2 OH at *m/z* 1165.7 with characteristic fragments.

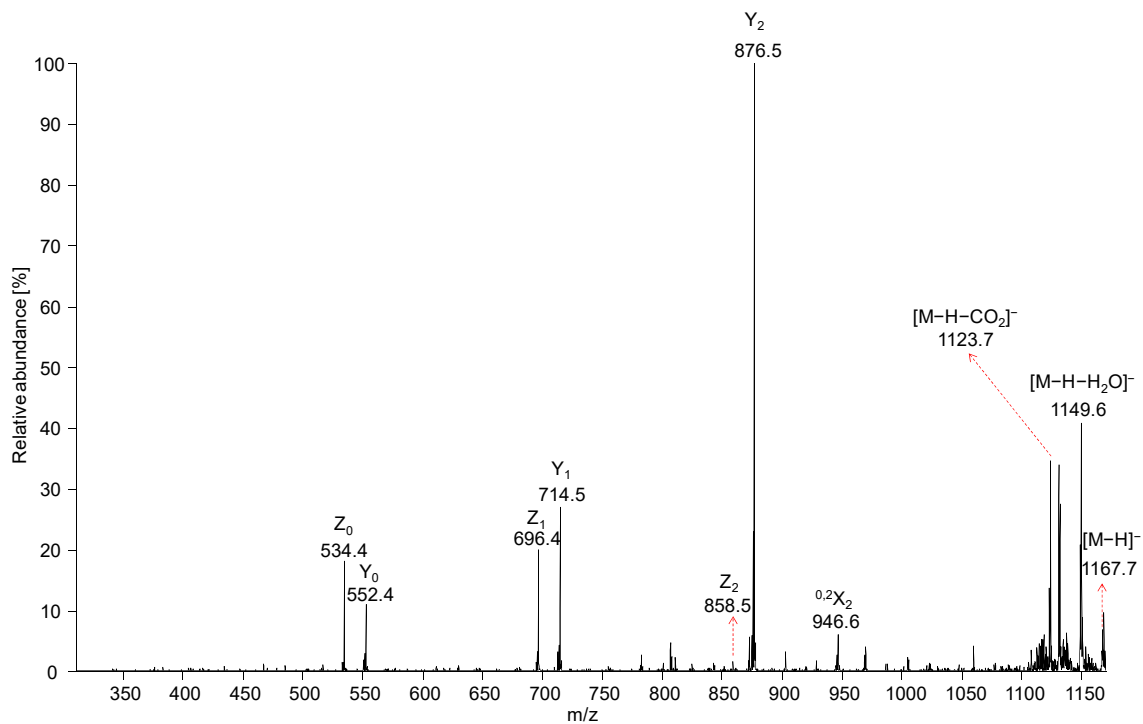

**Figure S59.** MS/MS spectrum of GM<sub>3</sub> 34:1 OH at *m/z* 1167.7 with characteristic fragments.

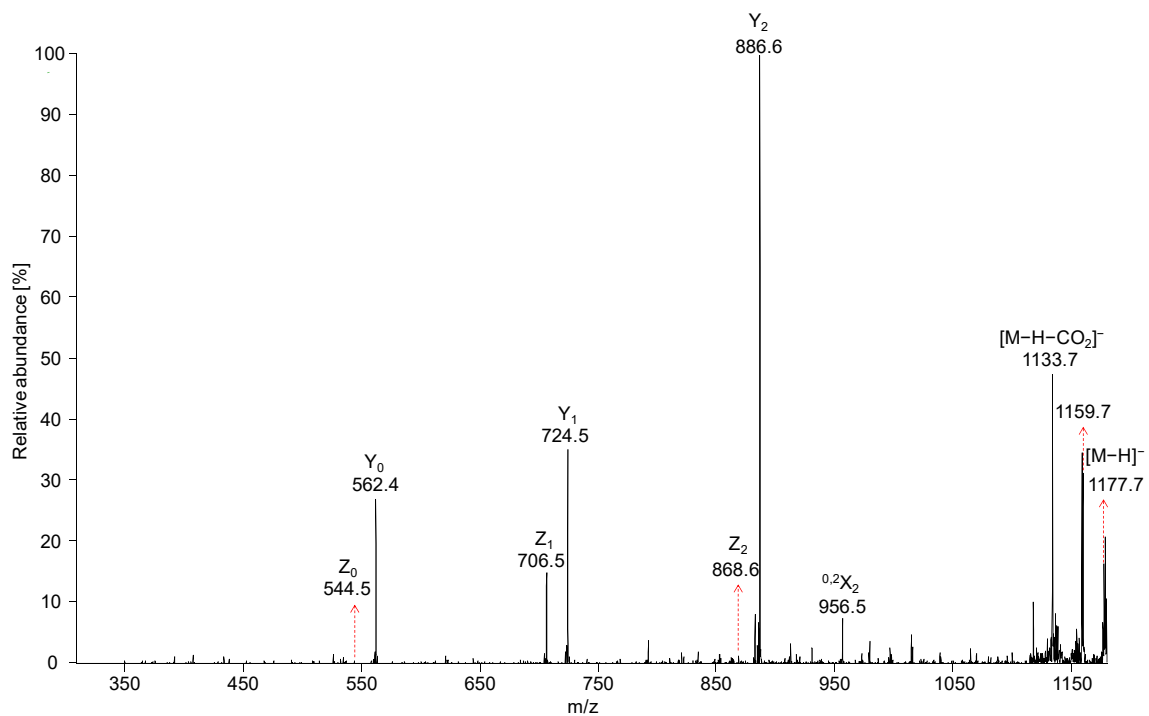

**Figure S60.** MS/MS spectrum of GM<sub>3</sub> 36:2 at  $m/z$  1177.7 with characteristic fragments.

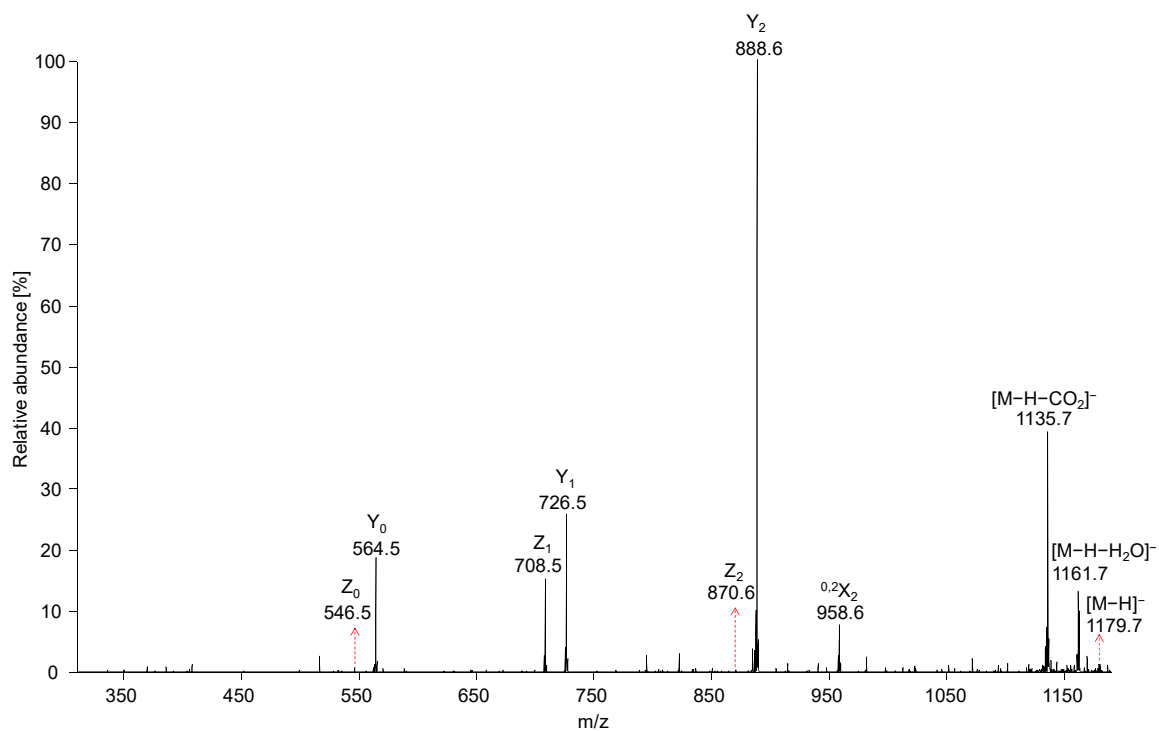

**Figure S61.** MS/MS spectrum of GM<sub>3</sub> 36:1 at  $m/z$  1179.7 with characteristic fragments.

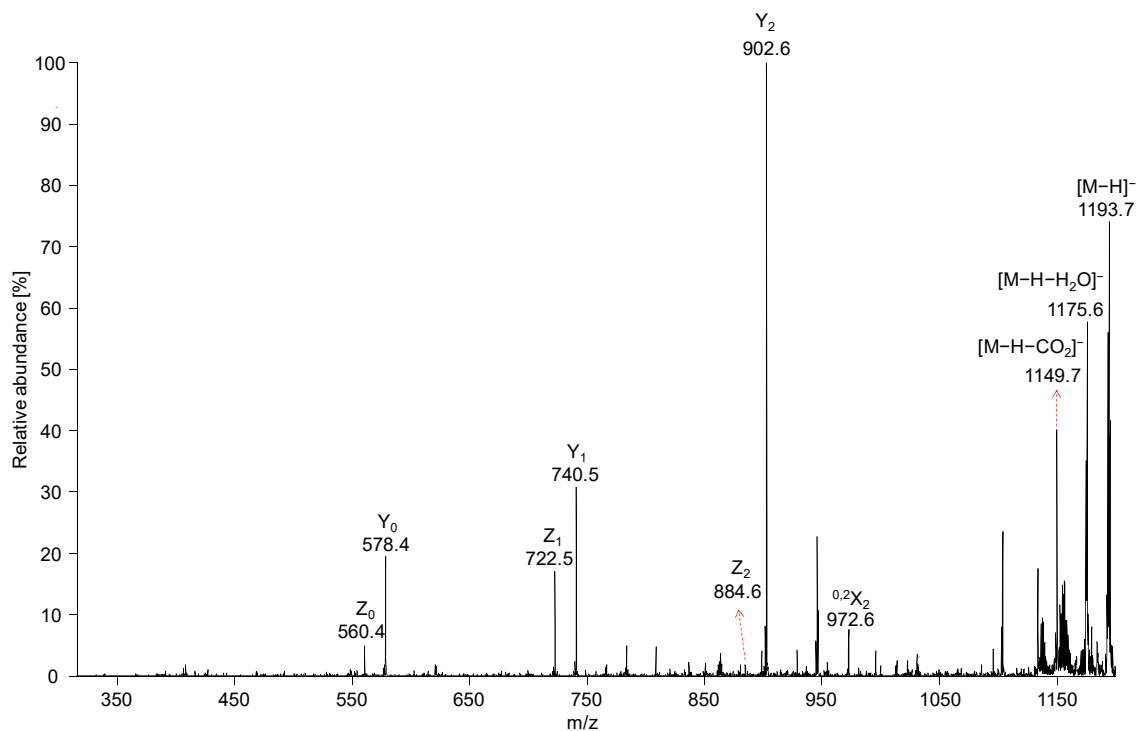

**Figure S62.** MS/MS spectrum of GM<sub>3</sub> 36:2 OH at  $m/z$  1193.7 with characteristic fragments.

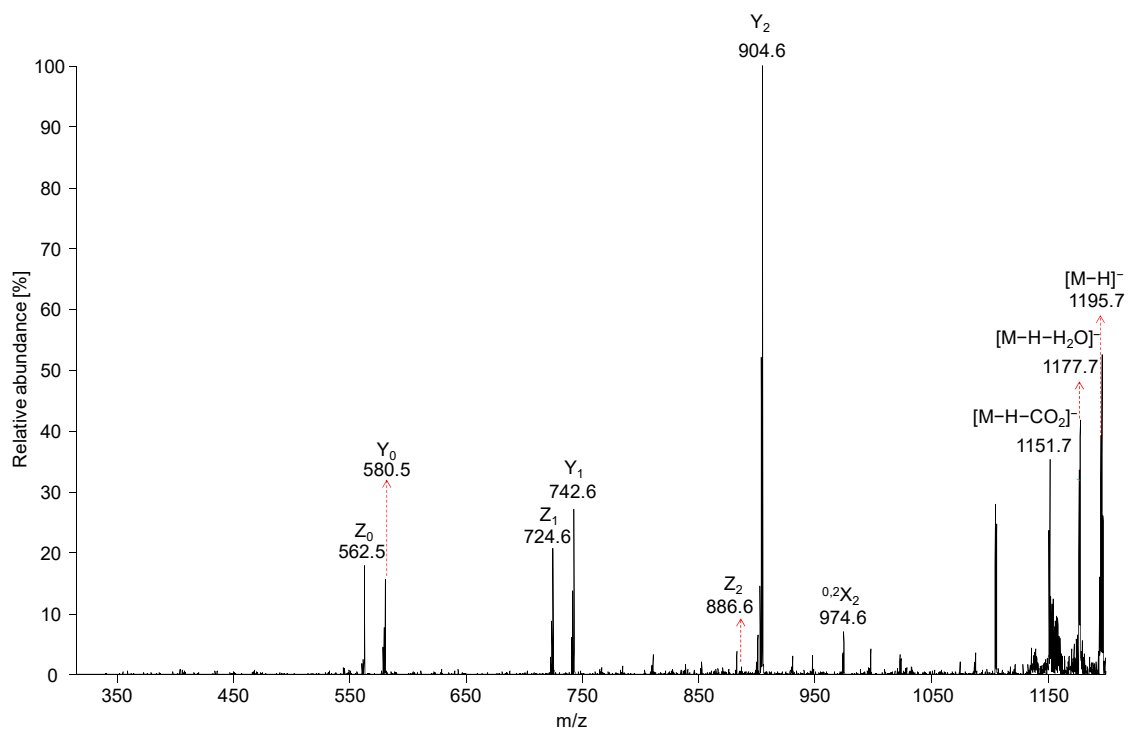

**Figure S63.** MS/MS spectrum of GM<sub>3</sub> 36:1 OH at  $m/z$  1195.7 with characteristic fragments.

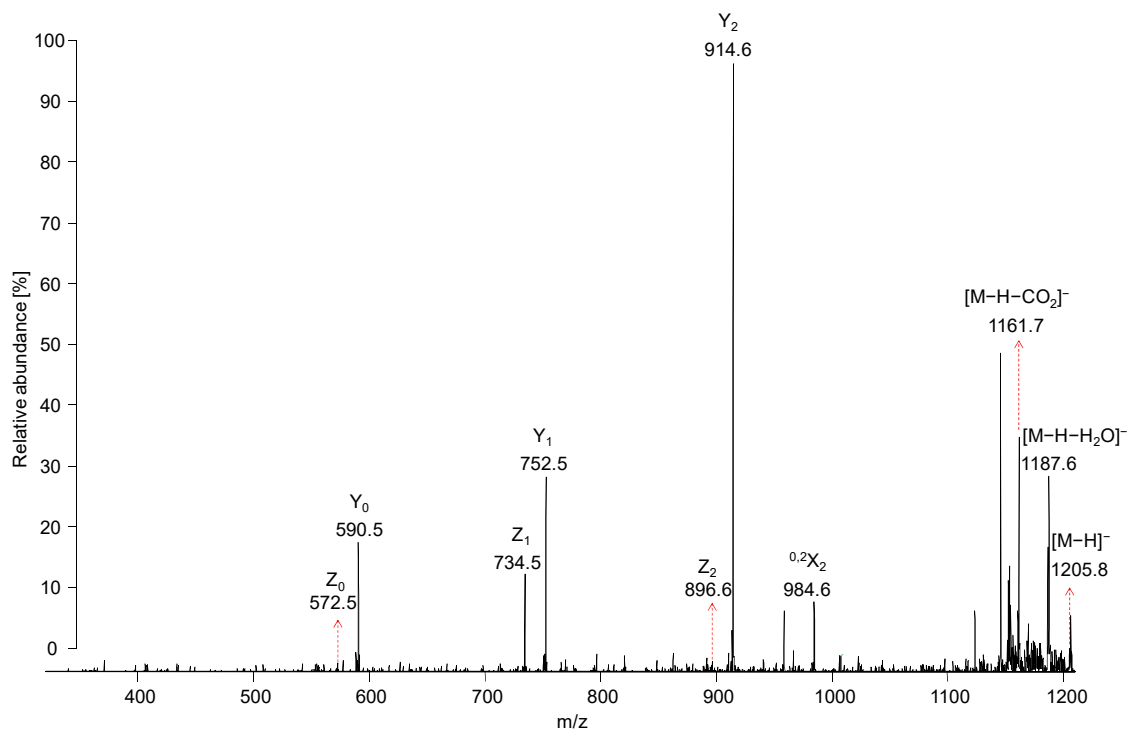

**Figure S64.** MS/MS spectrum of GM<sub>3</sub> 38:2 at  $m/z$  1205.8 with characteristic fragments.

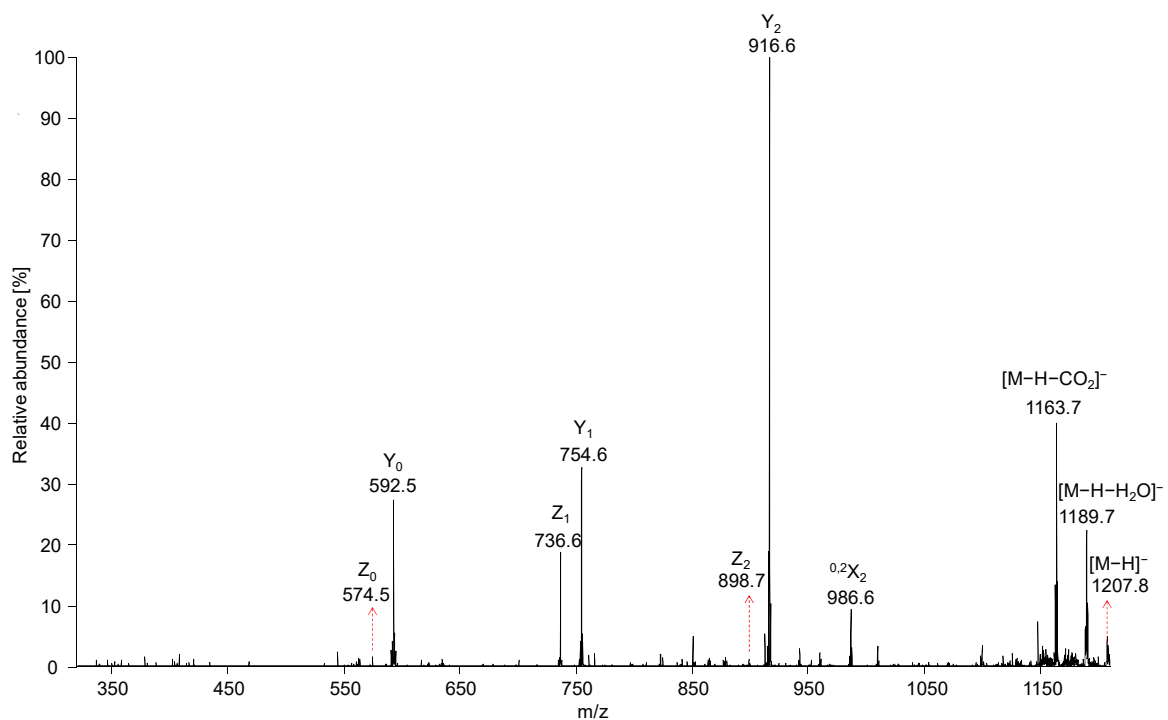

**Figure S65.** MS/MS spectrum of GM<sub>3</sub> 38:1 at  $m/z$  1207.8 with characteristic fragments.

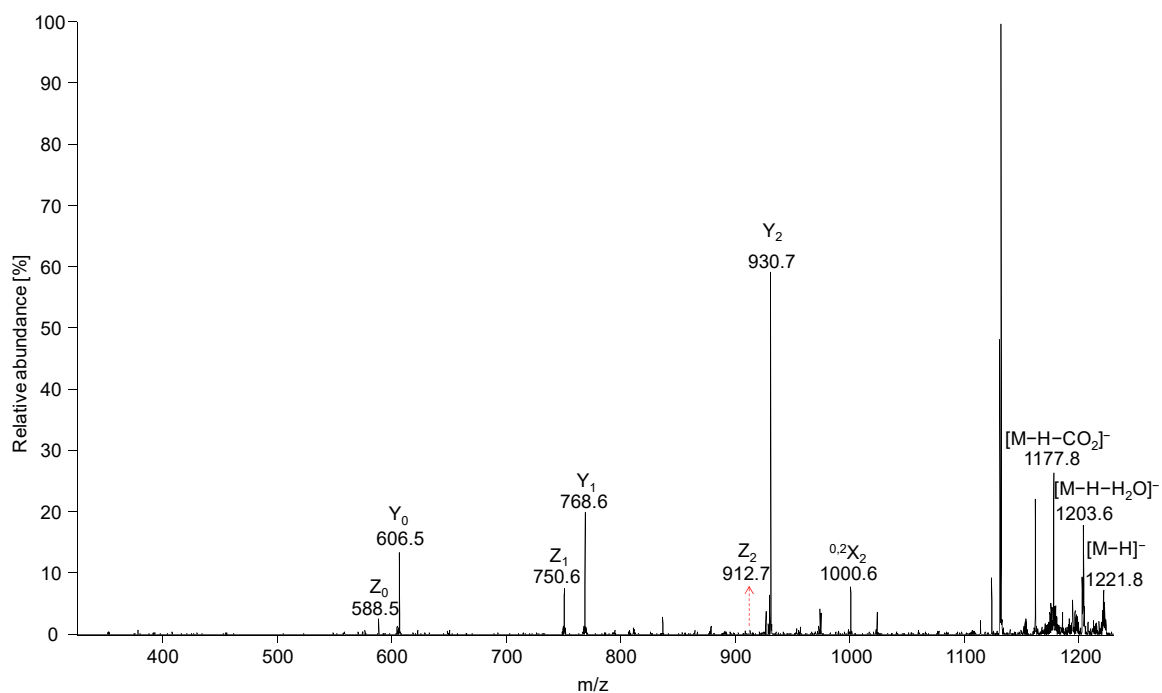

**Figure S66.** MS/MS spectrum of GM<sub>3</sub> 38:2 OH at *m/z* 1221.8 with characteristic fragments.

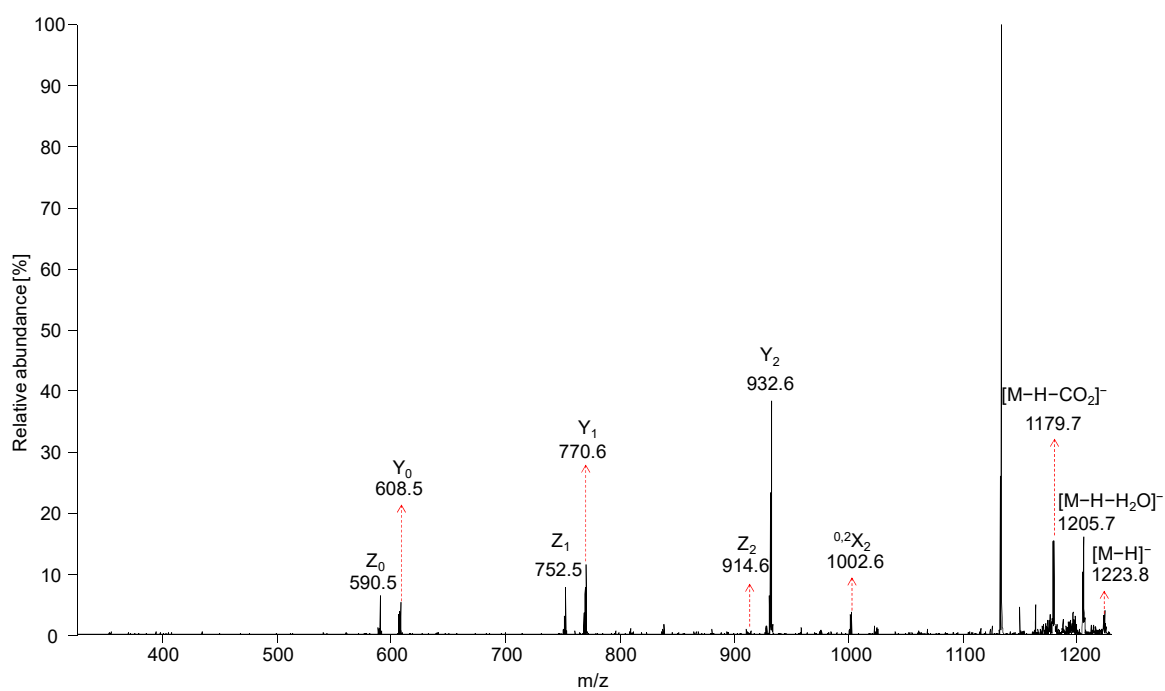

**Figure S67.** MS/MS spectrum of GM<sub>3</sub> 38:1 OH at *m/z* 1223.8 with characteristic fragments.



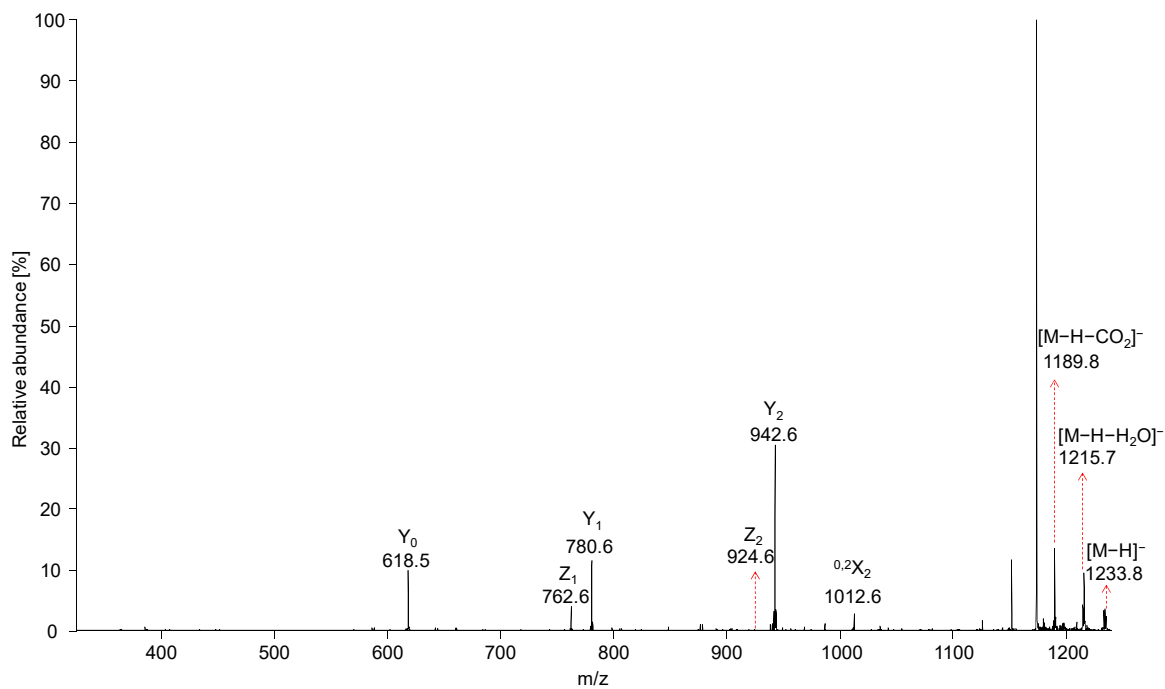

**Figure S68.** MS/MS spectrum of GM<sub>3</sub> 40:2 at  $m/z$  1233.8 with characteristic fragments.

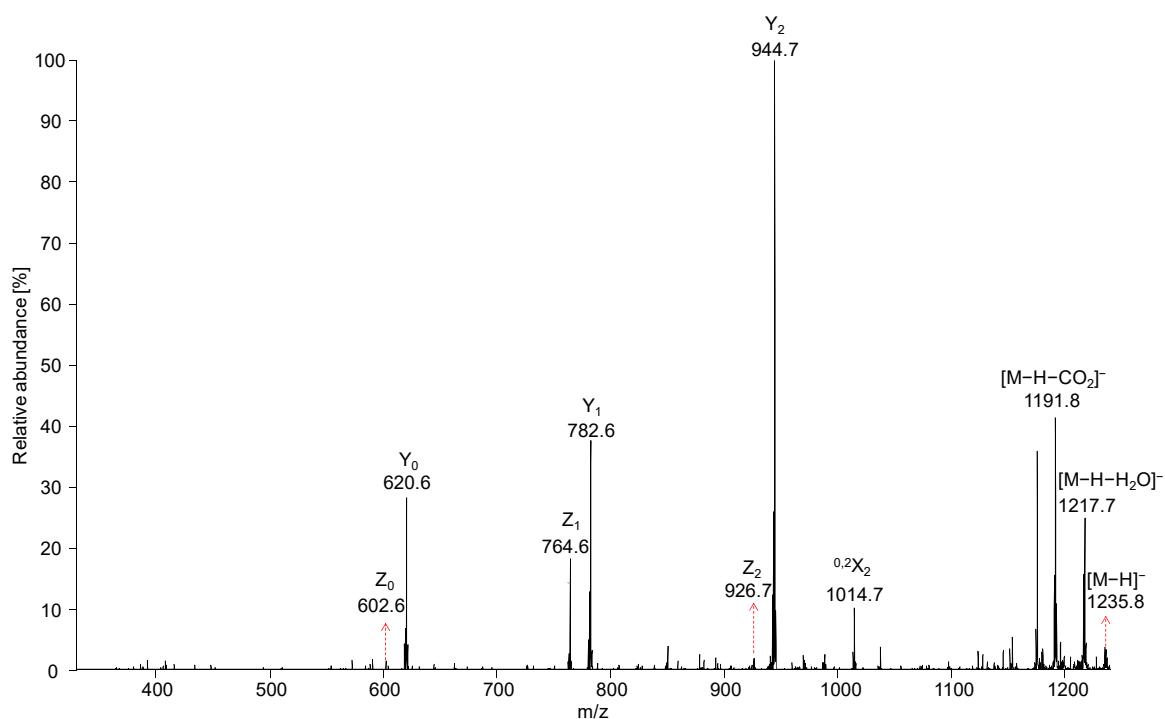

**Figure S69.** MS/MS spectrum of GM<sub>3</sub> 40:1 at  $m/z$  1235.8 with characteristic fragments.

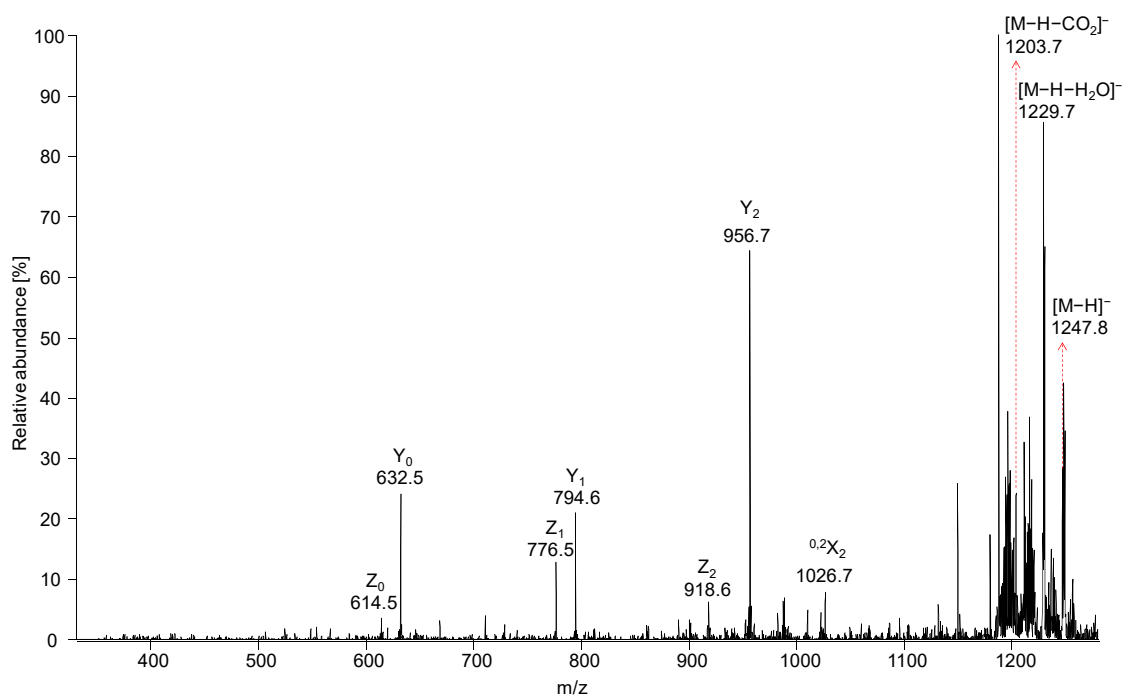

**Figure S70.** MS/MS spectrum of GM<sub>3</sub> 40:3 OH at  $m/z$  1247.8 with characteristic fragments.

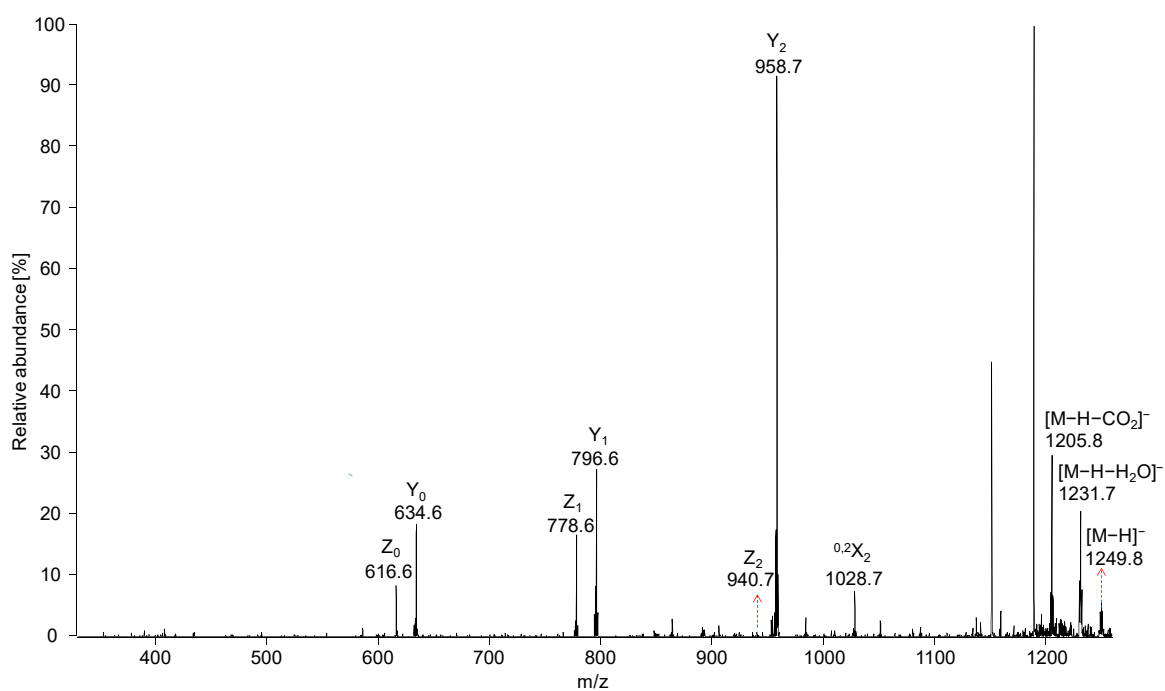

**Figure S71.** MS/MS spectrum of GM<sub>3</sub> 40:2 OH at  $m/z$  1249.8 with characteristic fragments.

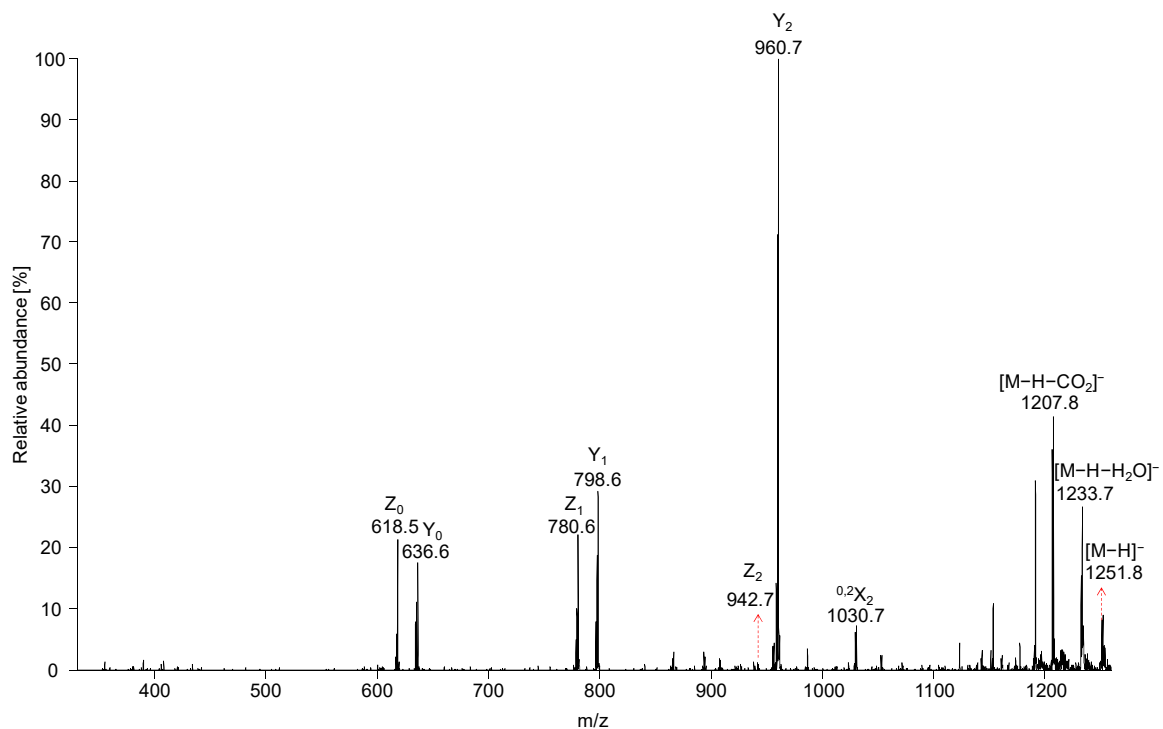

**Figure S72.** MS/MS spectrum of GM<sub>3</sub> 40:1 OH at  $m/z$  1251.8 with characteristic fragments.

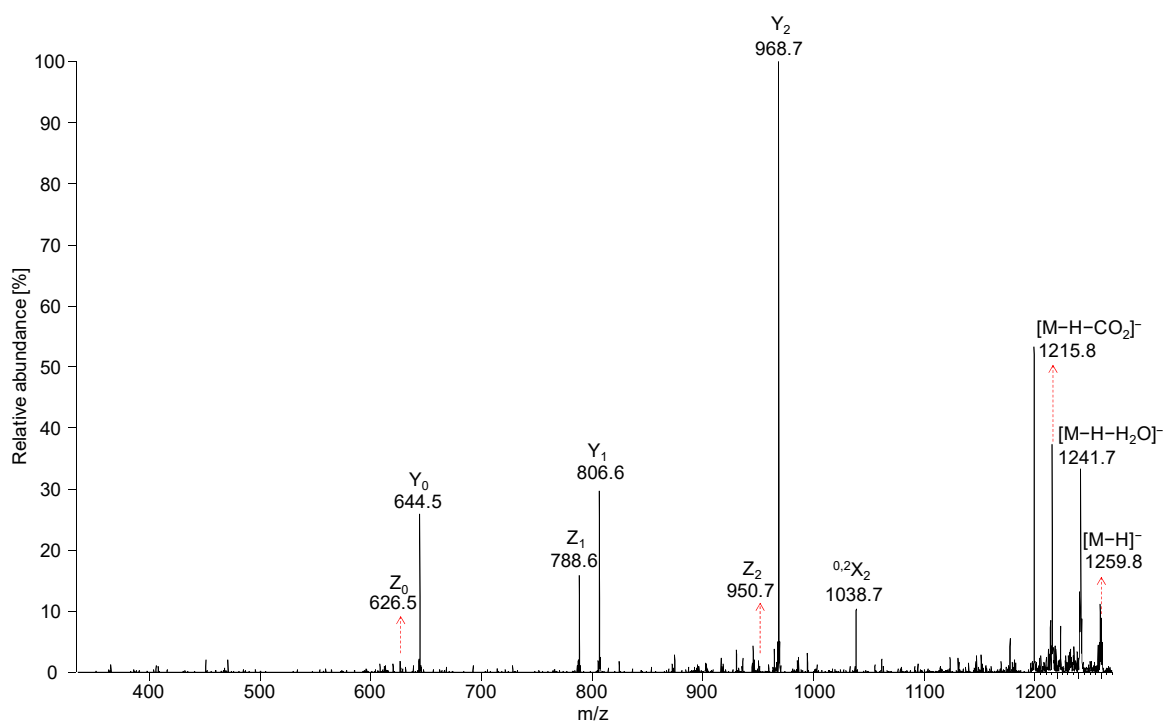

**Figure S73.** MS/MS spectrum of GM<sub>3</sub> 42:3 at  $m/z$  1259.8 with characteristic fragments.

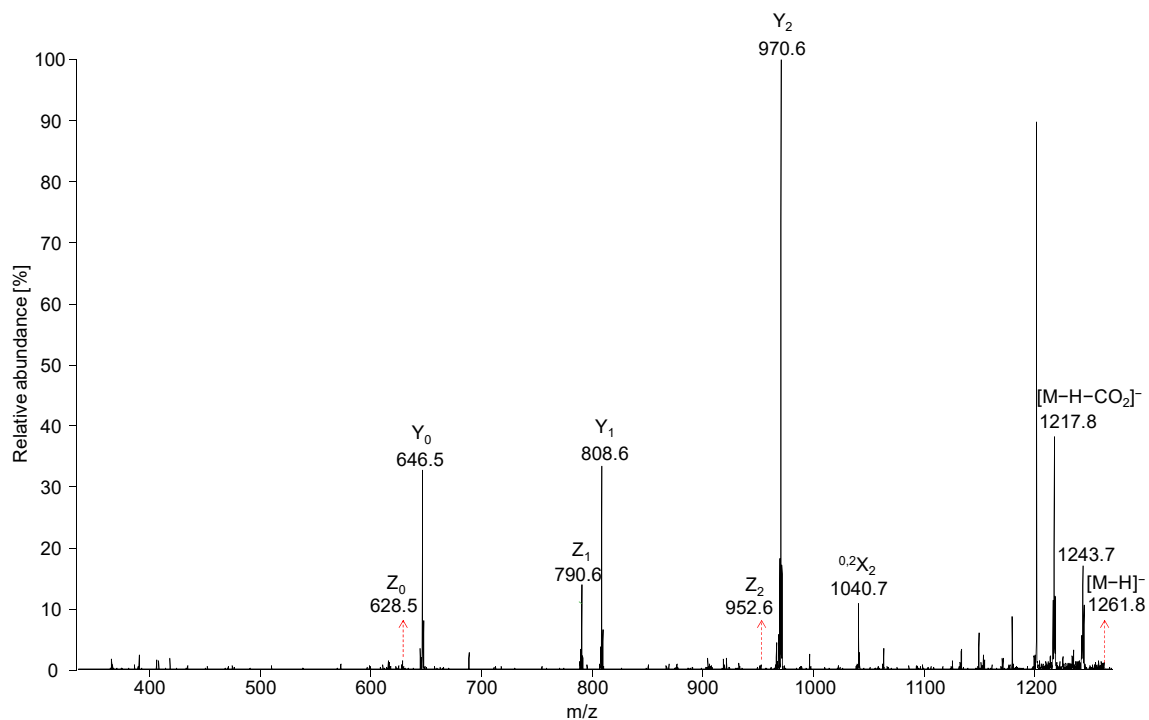

**Figure S74.** MS/MS spectrum of GM<sub>3</sub> 42:2 at  $m/z$  1261.8 with characteristic fragments.

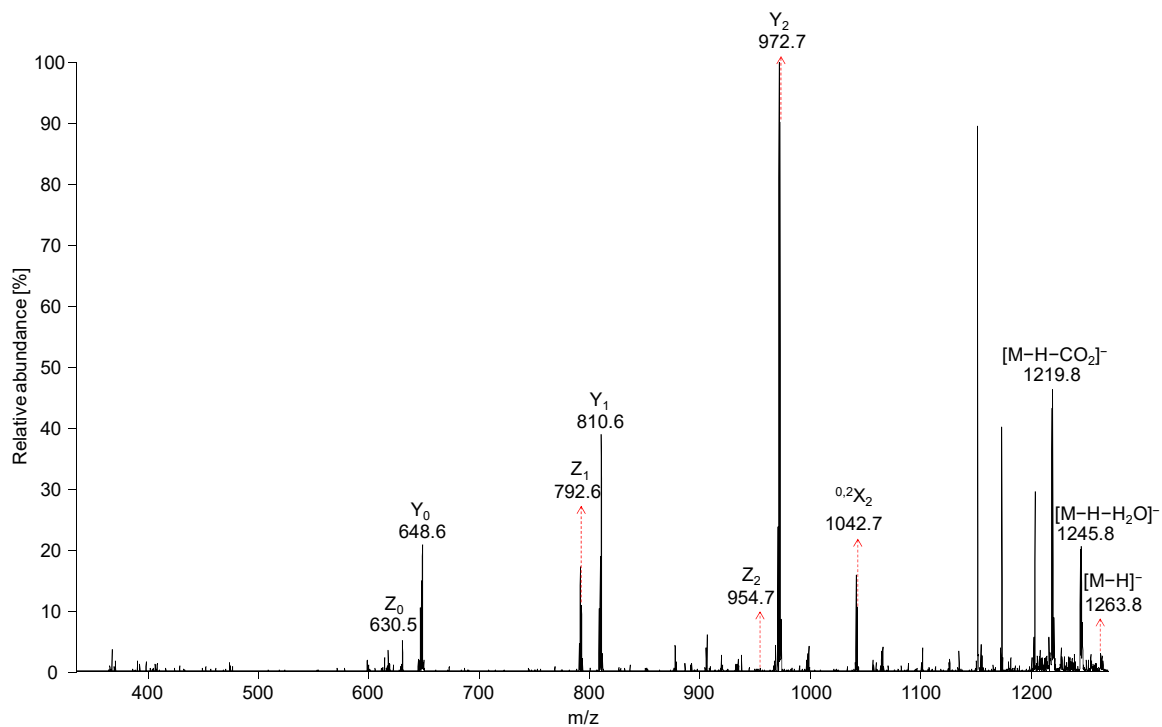

**Figure S75.** MS/MS spectrum of GM<sub>3</sub> 42:1 at  $m/z$  1263.8 with characteristic fragments.

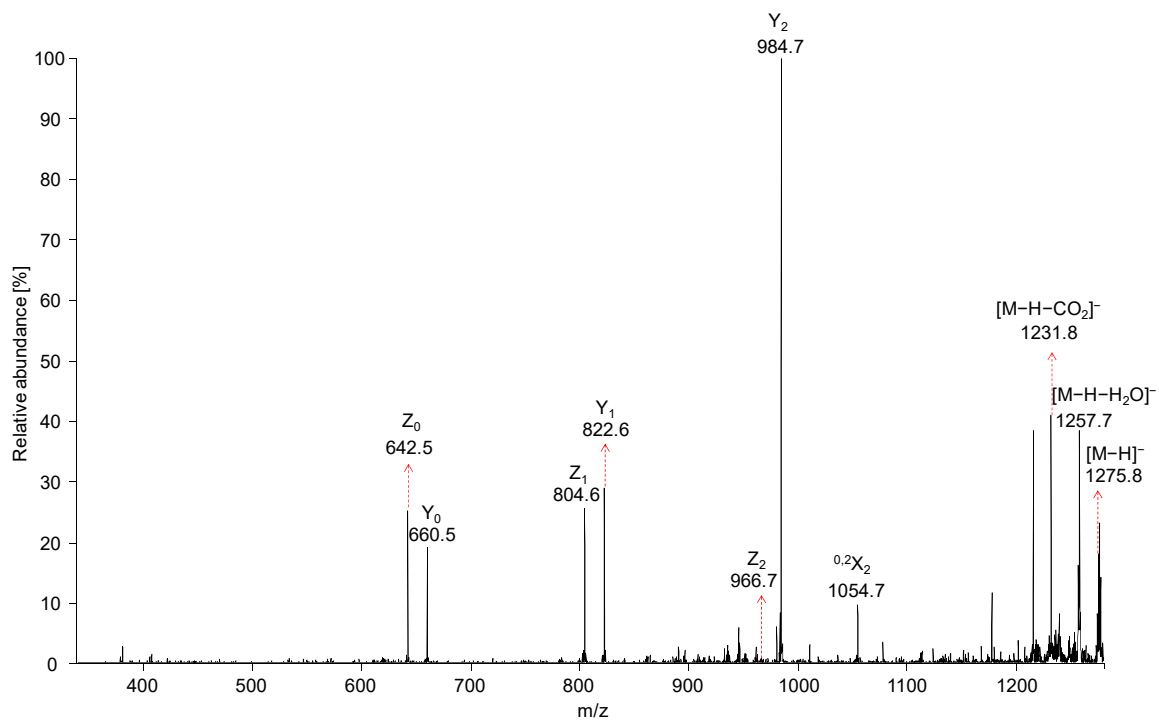

**Figure S76.** MS/MS spectrum of GM<sub>3</sub> 42:3 OH at  $m/z$  1275.8 with characteristic fragments.

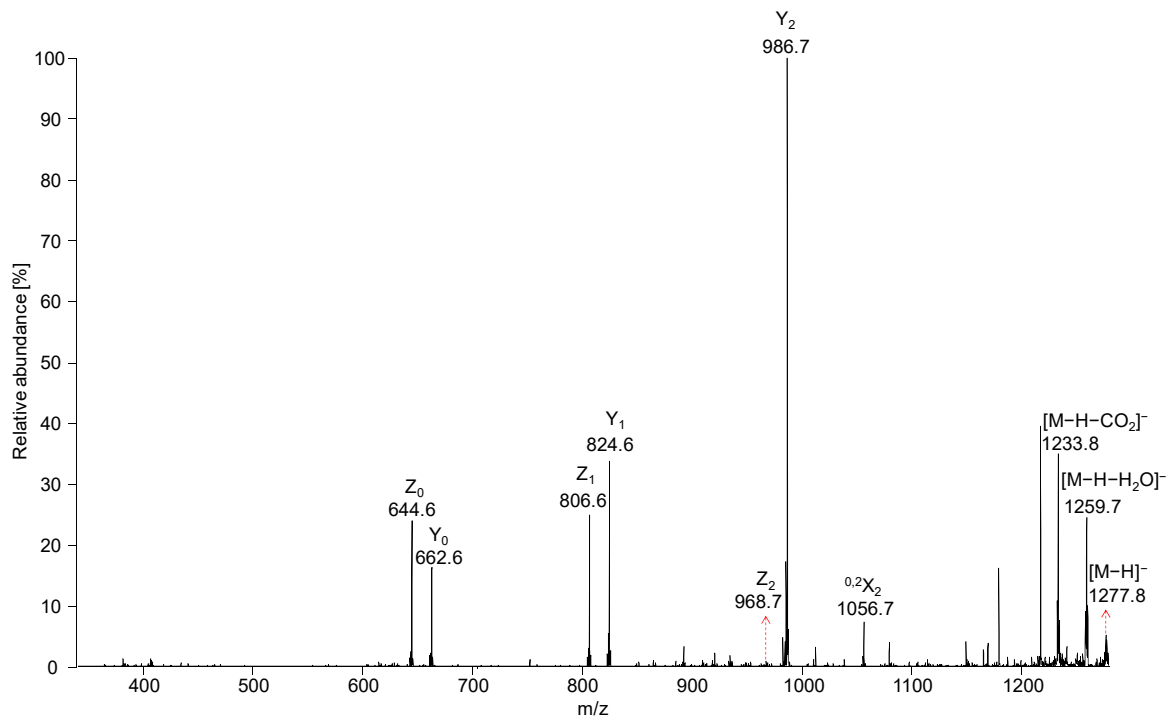

**Figure S77.** MS/MS spectrum of GM<sub>3</sub> 42:2 OH at  $m/z$  1277.8 with characteristic fragments.

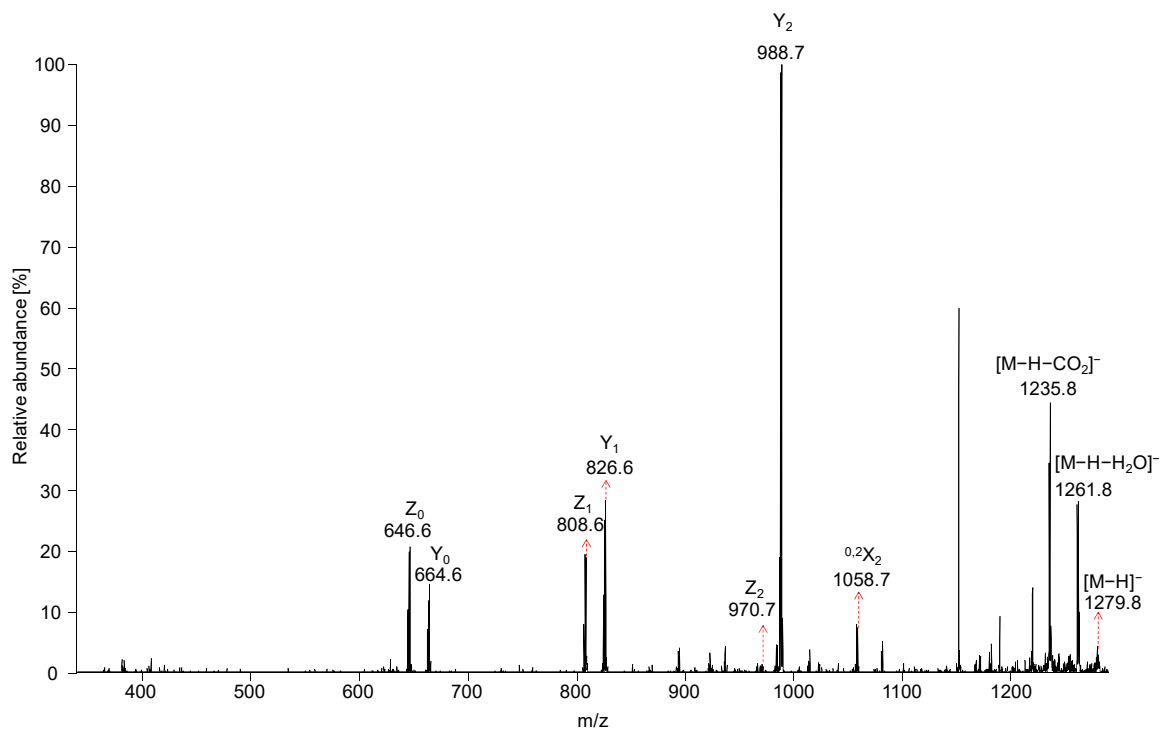

**Figure S78.** MS/MS spectrum of GM<sub>3</sub> 42:1 OH at  $m/z$  1279.8 with characteristic fragments.

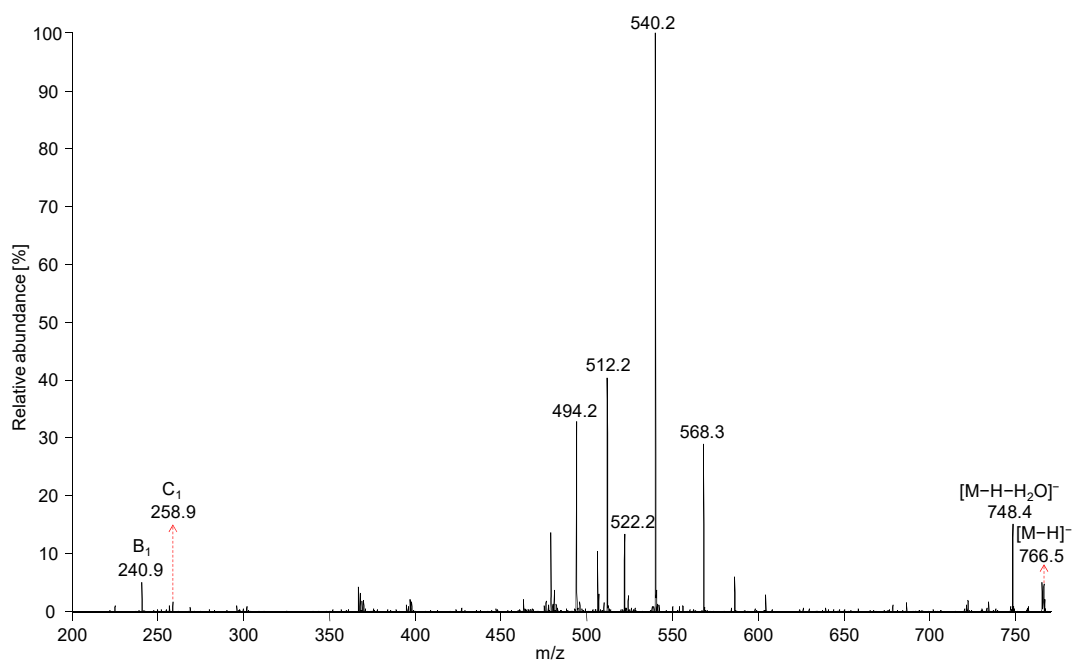

**Figure S79.** MS/MS spectrum of SHexCer 32:1 OH at  $m/z$  766.5 with characteristic fragments. The presence of hydroxyl group is confirmed by the ion cluster at  $m/z$  568, 540, and 522 (typical for sphingosine base 18:1), and  $m/z$  540, 512, and 494 (typical for sphingosine base 16:1).

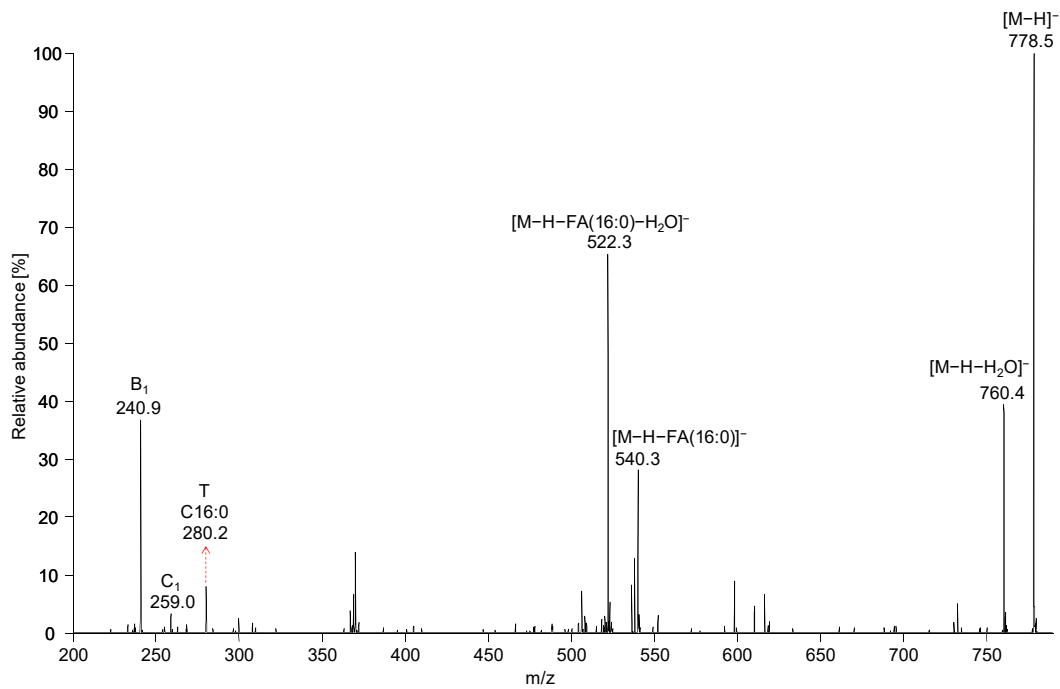

**Figure S80.** MS/MS spectrum of SHexCer 34:1 at  $m/z$  778.5 with characteristic fragments.

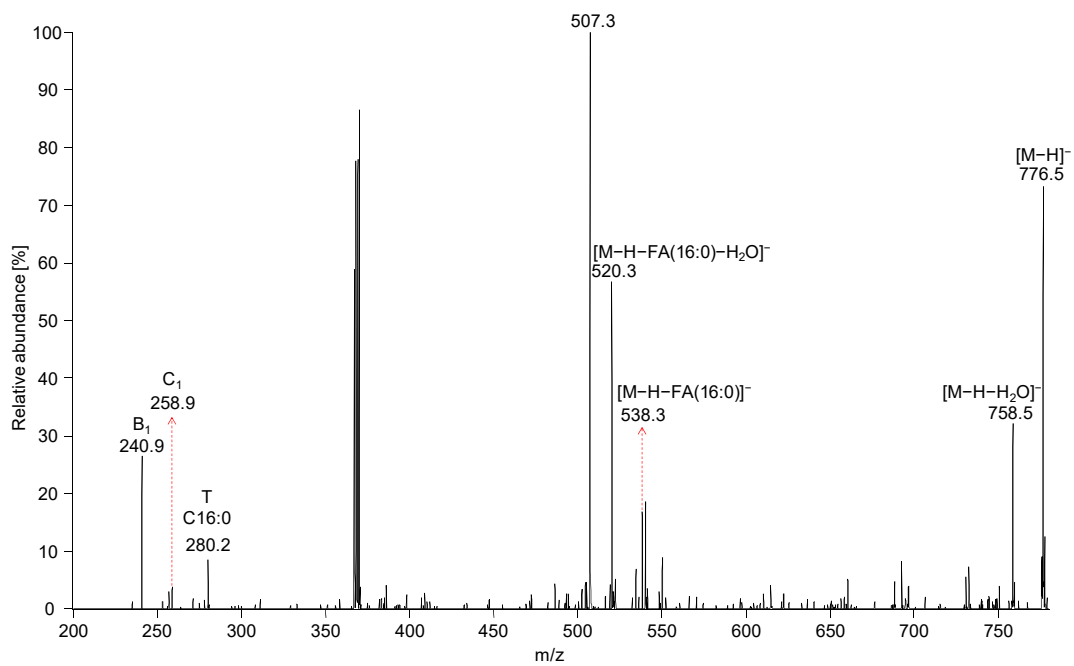

**Figure S81.** MS/MS spectrum of SHexCer 34:2 at  $m/z$  776.5 with characteristic fragments.

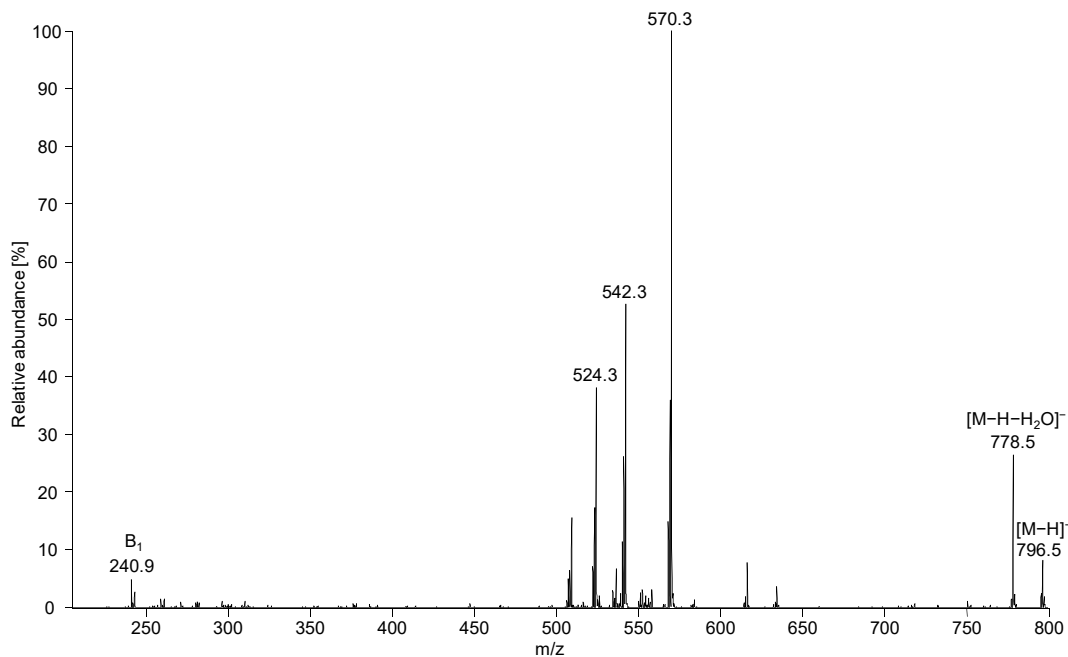

**Figure S82.** MS/MS spectrum of SHexCer 34:0 OH at  $m/z$  796.5 with characteristic fragments. The presence of hydroxyl group is confirmed by the ion cluster at  $m/z$  570, 542, and 524 (typical for sphingosine base 18:0).

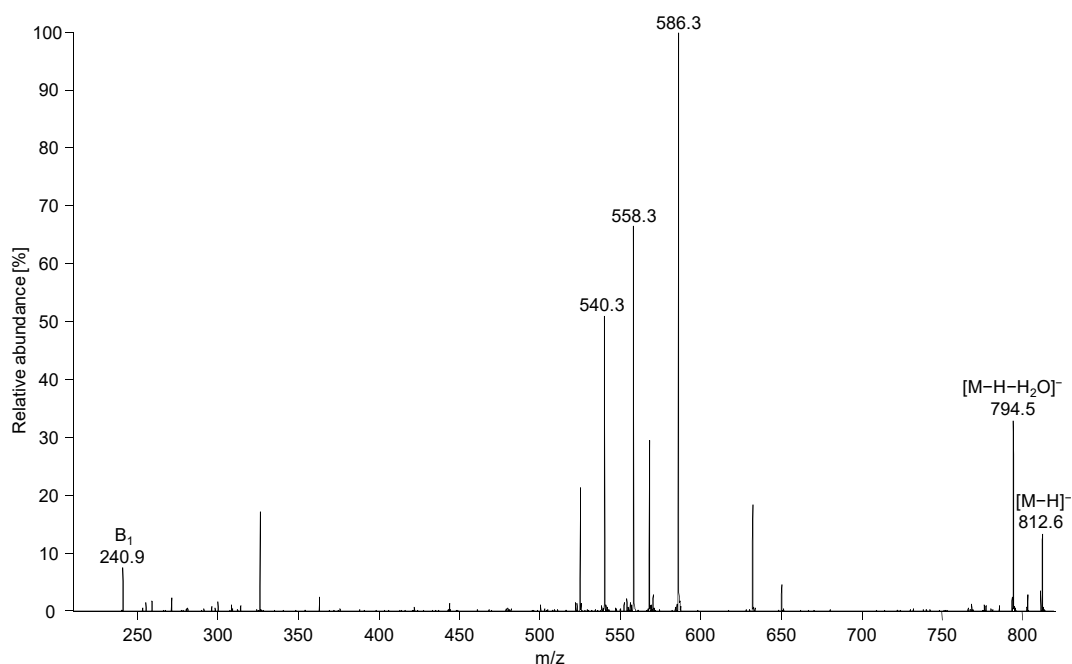

**Figure S83.** MS/MS spectrum of SHexCer 34:0 2OH at  $m/z$  812.6 with characteristic fragments. The presence of two hydroxyl group is confirmed by the ion cluster at  $m/z$  586, 558, and 540 (typical for sphingosine base 18:1 OH).



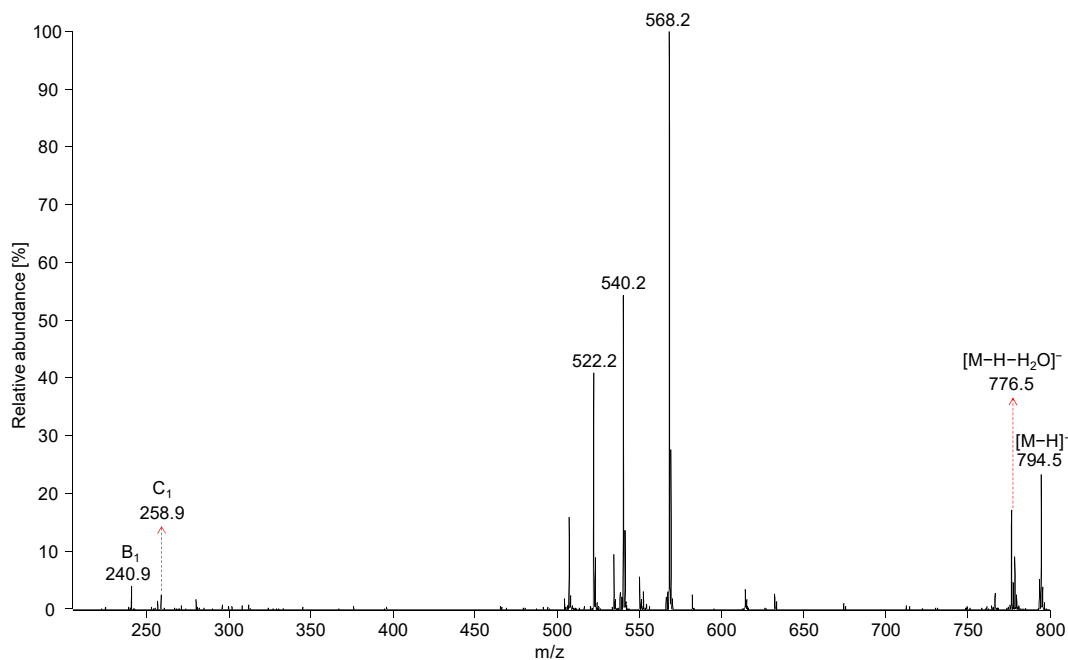

**Figure S84.** MS/MS spectrum of SHexCer 34:1 OH at  $m/z$  794.5 with characteristic fragments. The presence of hydroxyl group is confirmed by the ion cluster at  $m/z$  568, 540, and 522 (typical for sphingosine base 18:1).

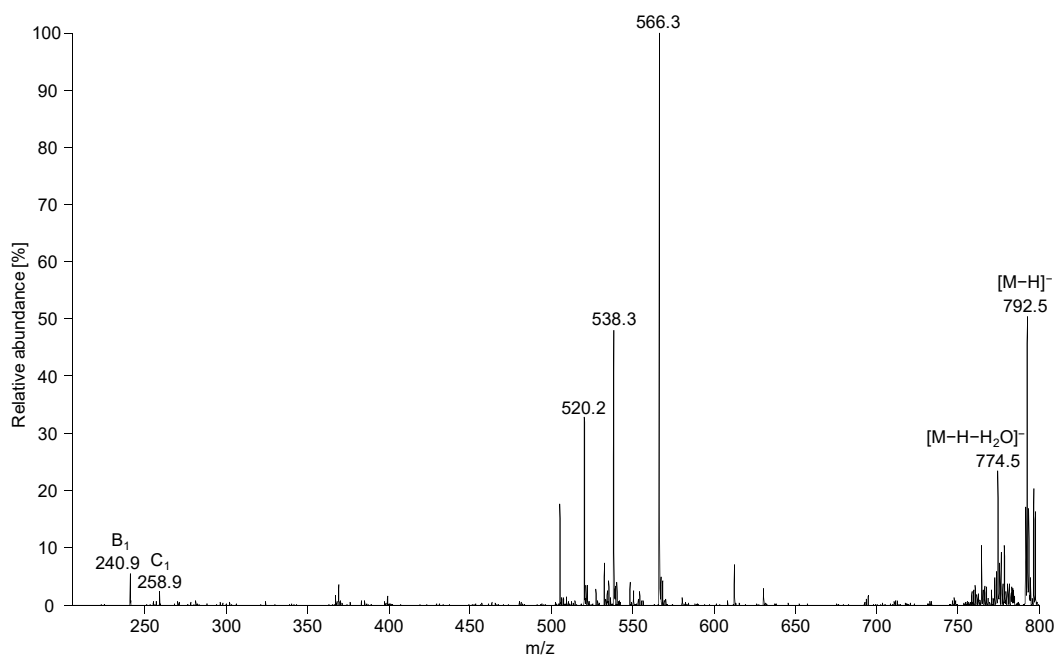

**Figure S85.** MS/MS spectrum of SHexCer 34:2 OH at  $m/z$  792.5 with characteristic fragments. The presence of hydroxyl group is confirmed by the ion cluster at  $m/z$  566, 538, and 520 (typical for sphingosine base 18:2).

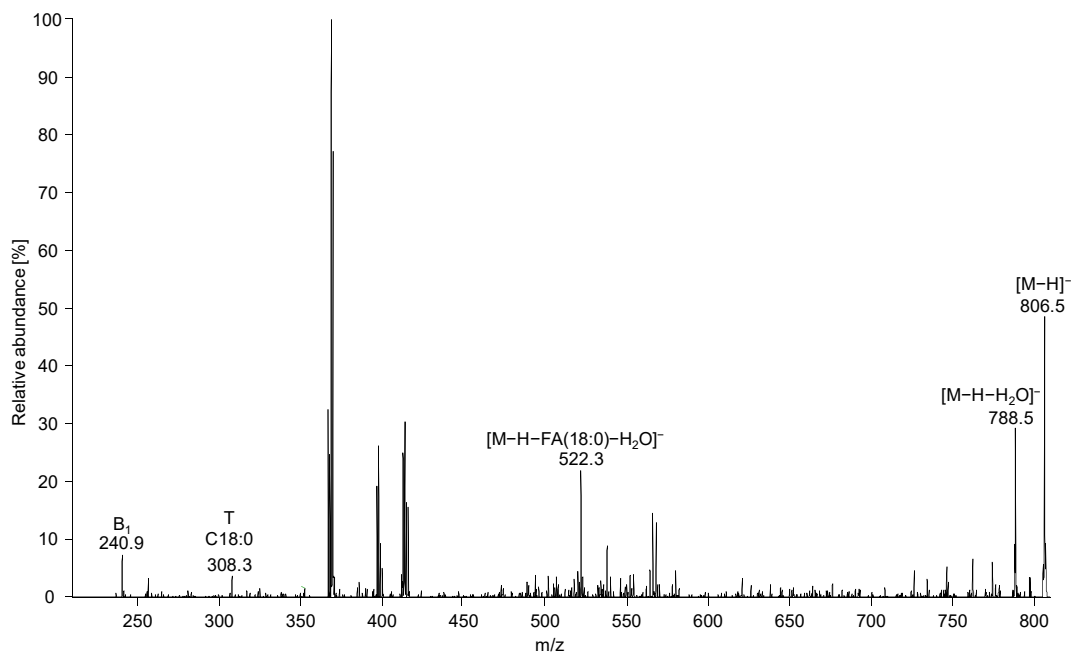

**Figure S86.** MS/MS spectrum of SHexCer 36:1 at  $m/z$  806.5 with characteristic fragments.

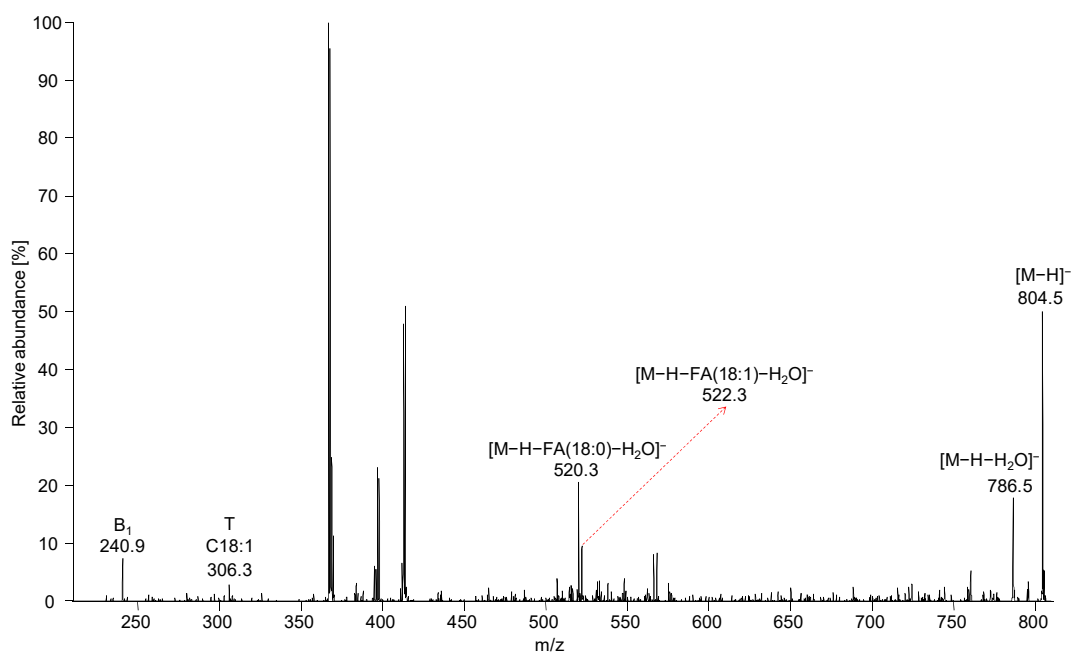

**Figure S87.** MS/MS spectrum of SHexCer 36:2 at  $m/z$  804.5 with characteristic fragments.

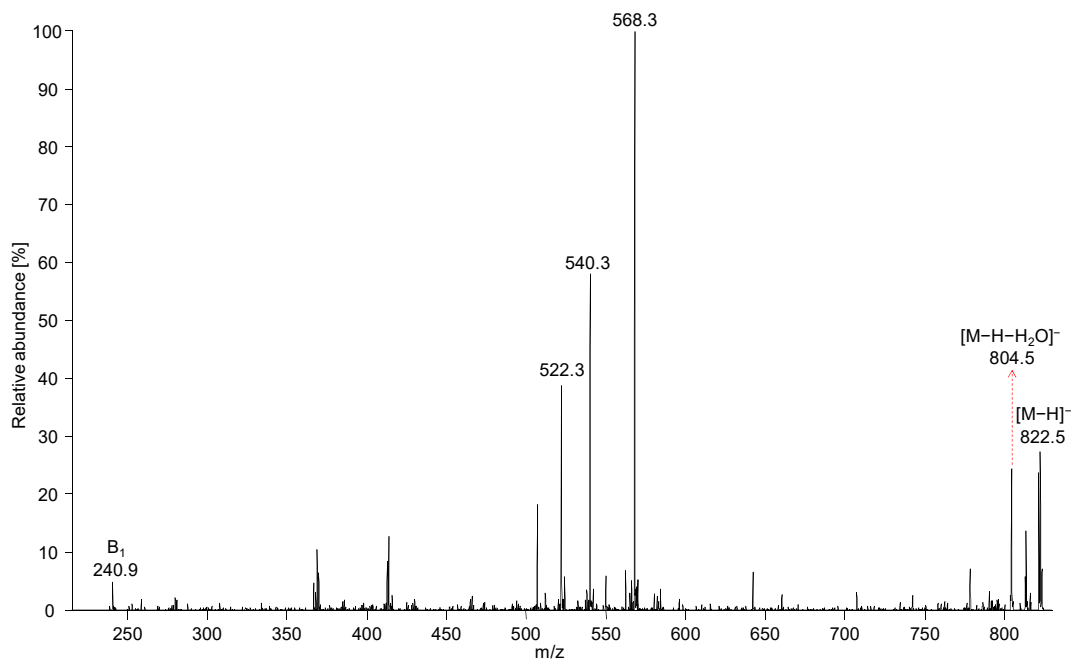

**Figure S88.** MS/MS spectrum of SHexCer 36:1 OH at  $m/z$  822.5 with characteristic fragments. The presence of hydroxyl group is confirmed by the ion cluster at  $m/z$  568, 540, and 522 (typical for sphingosine base 18:1).

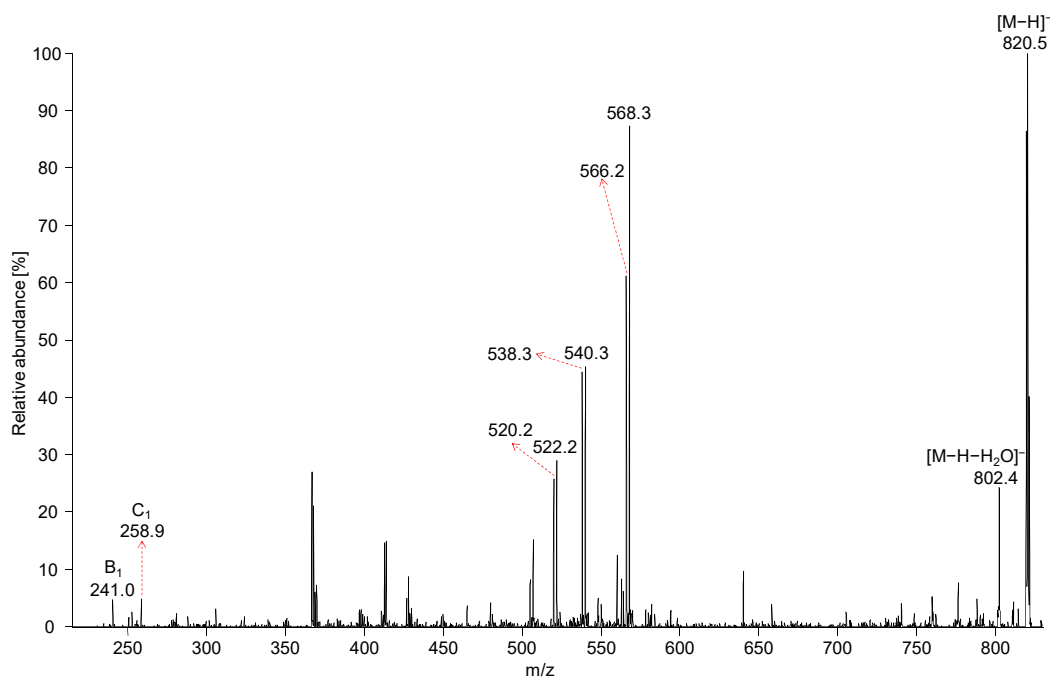

**Figure S89.** MS/MS spectrum of SHexCer 36:2 OH at  $m/z$  820.5 with characteristic fragments. The presence of hydroxyl group is confirmed by the ion cluster at  $m/z$  568, 540, and 522 (typical for sphingosine base 18:1) and  $m/z$  566, 538, and 520 (typical for sphingosine base 18:2).

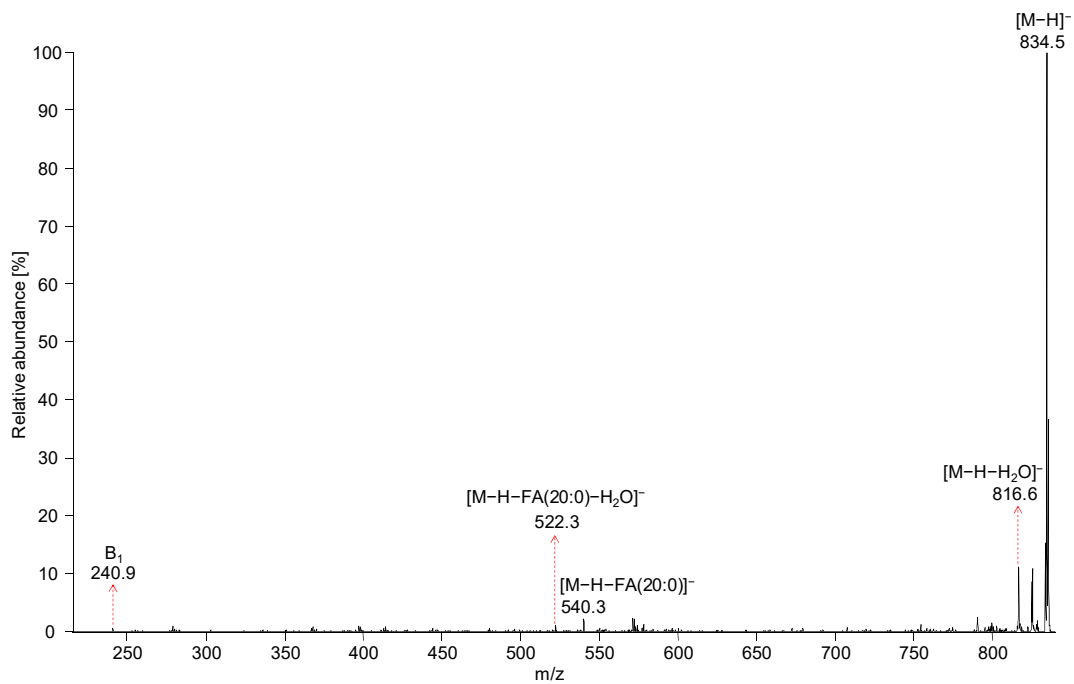

**Figure S90.** MS/MS spectrum of SHexCer 38:1 at  $m/z$  834.5 with characteristic fragments.

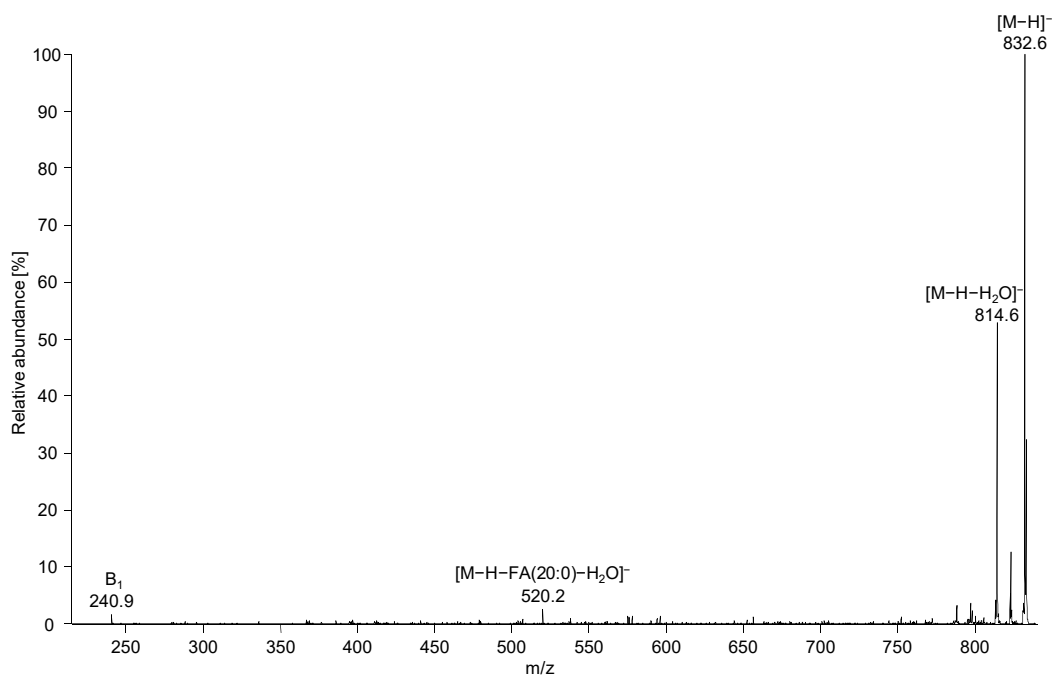

**Figure S91.** MS/MS spectrum of SHexCer 38:2 at  $m/z$  832.6 with characteristic fragments.

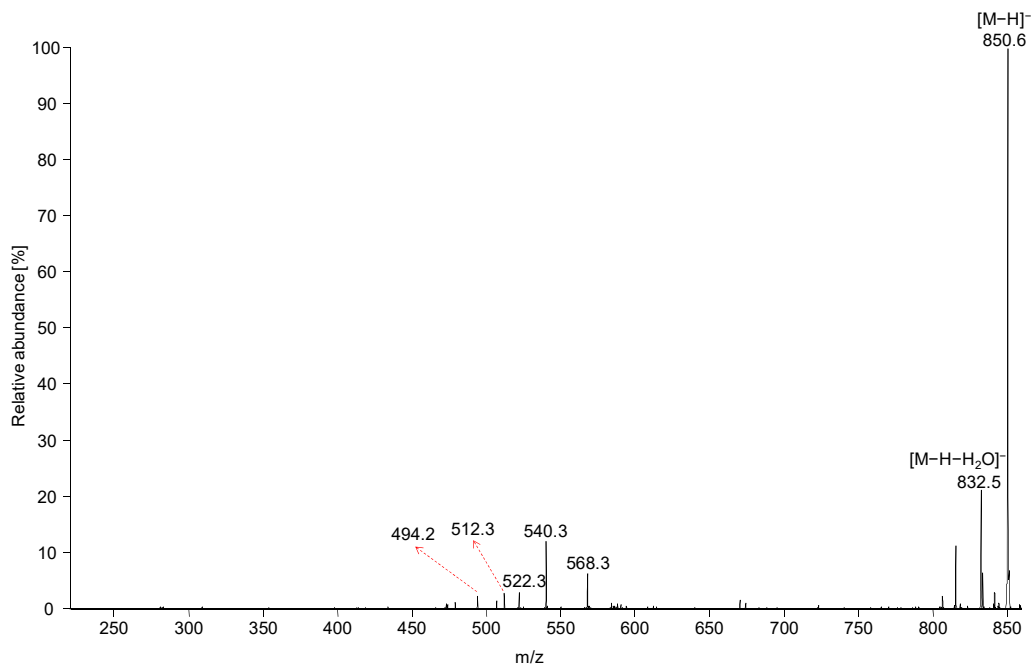

**Figure S92.** MS/MS spectrum of SHexCer 38:1 OH at  $m/z$  850.6 with characteristic fragments. The presence of hydroxyl group is confirmed by the ion cluster at  $m/z$  568, 540, and 522 (typical for sphingosine base 18:1) and  $m/z$  540, 512, and 494 (typical for sphingosine base 16:1).

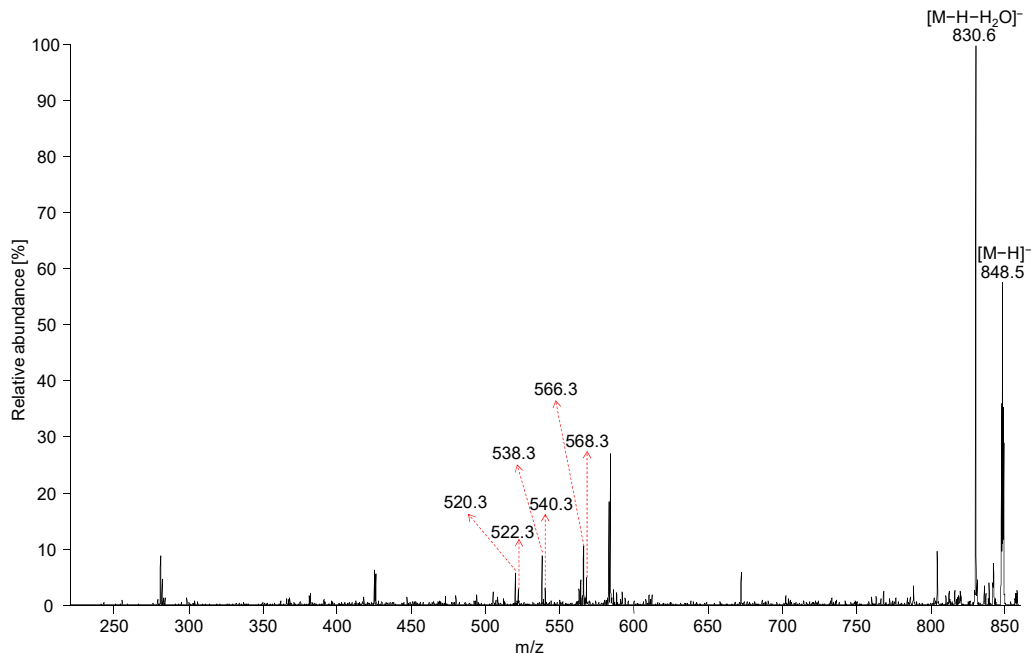

**Figure S93.** MS/MS spectrum of SHexCer 38:2 OH at  $m/z$  848.5 with characteristic fragments. The presence of hydroxyl group is confirmed by the ion cluster at  $m/z$  568, 540, and 522 (typical for sphingosine base 18:1) and  $m/z$  566, 538, and 520 (typical for sphingosine base 18:2).

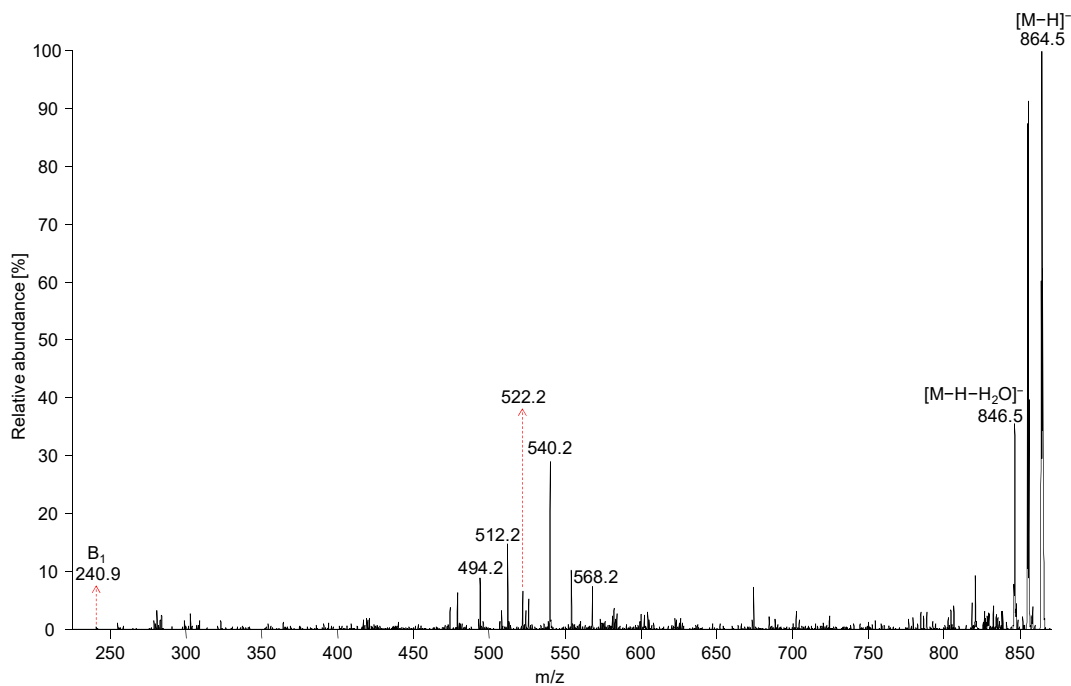

**Figure S94.** MS/MS spectrum of SHexCer 39:1 OH at  $m/z$  864.5 with characteristic fragments. The presence of hydroxyl group is confirmed by the ion cluster at  $m/z$  568, 540, and 522 (typical for sphingosine base 18:1) and  $m/z$  540, 512, and 494 (typical for sphingosine base 16:1).

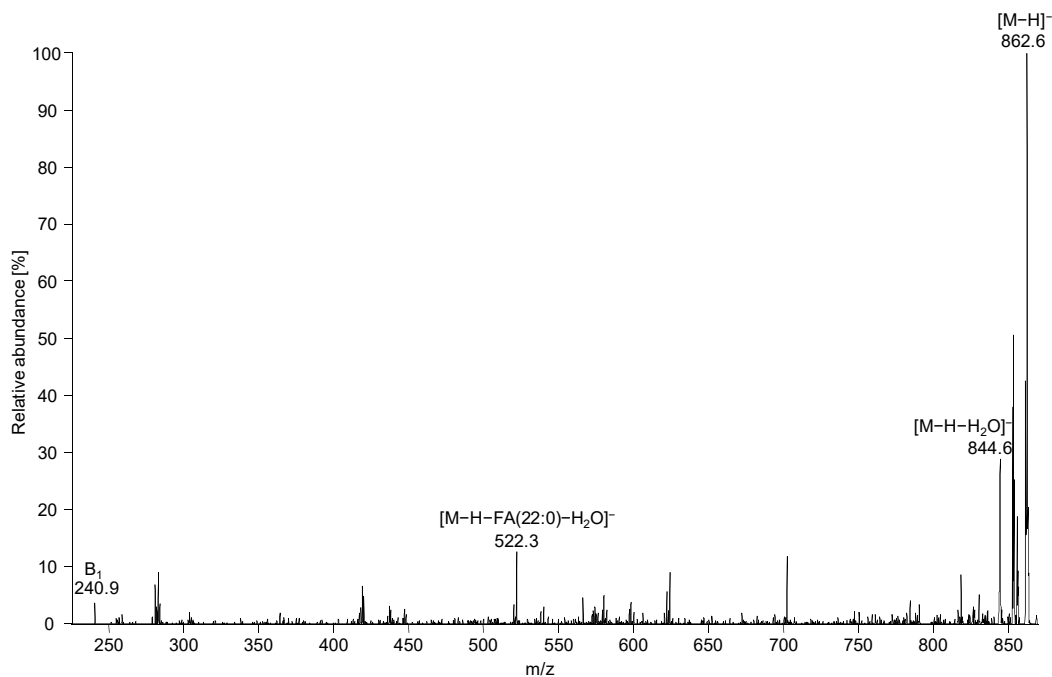

**Figure S95.** MS/MS spectrum of SHexCer 40:1 at  $m/z$  862.6 with characteristic fragments.

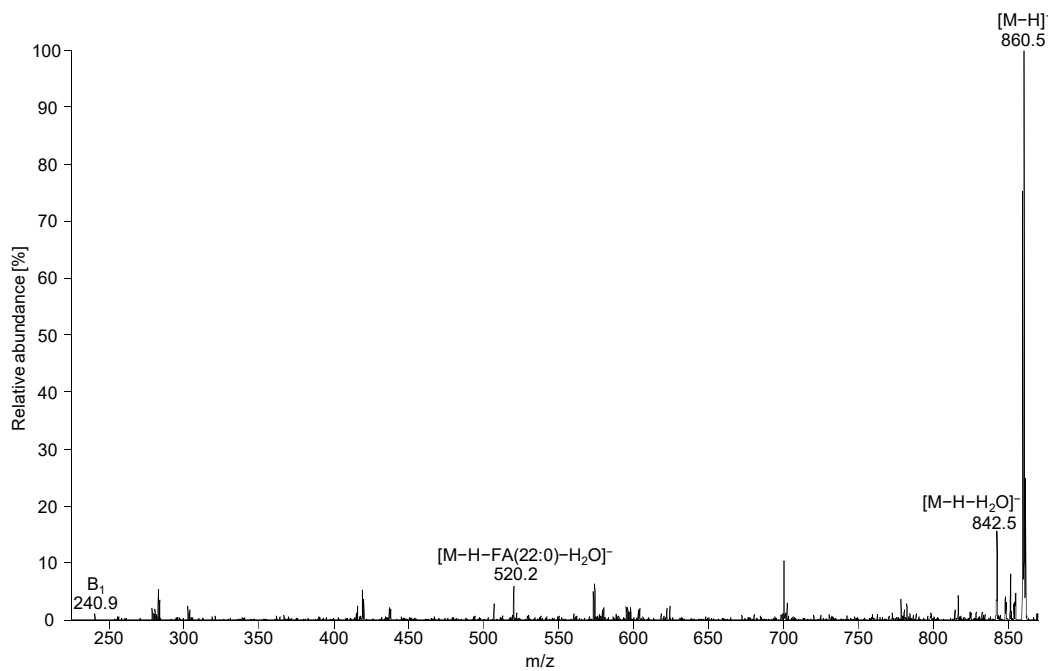

**Figure S96.** MS/MS spectrum of SHexCer 40:2 at  $m/z$  860.5 with characteristic fragments.

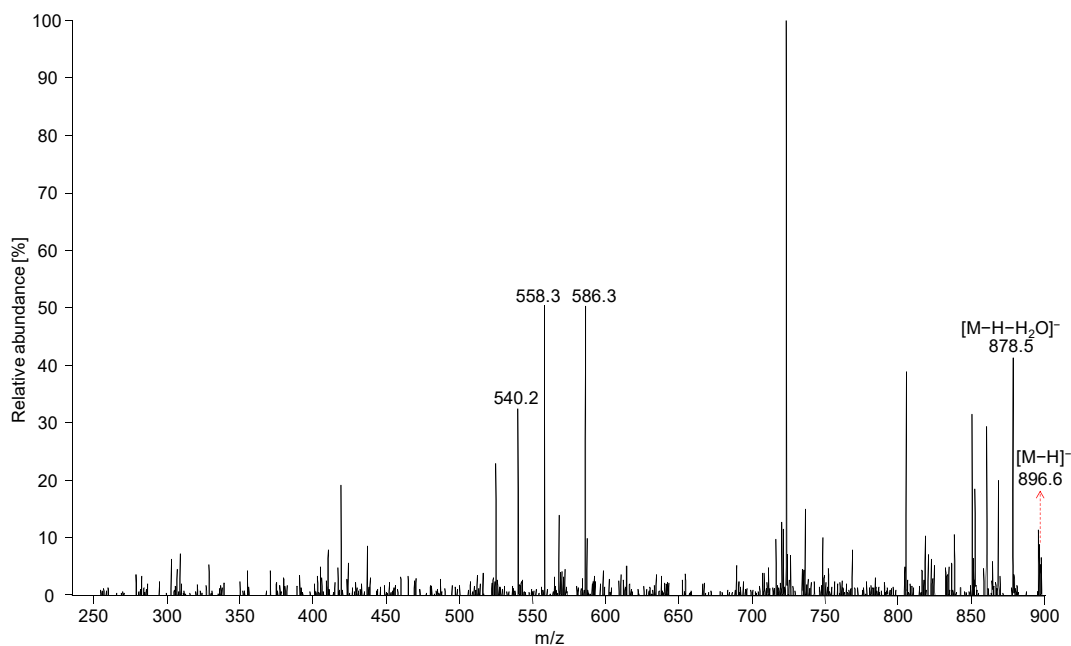

**Figure S97.** MS/MS spectrum of SHexCer 40:0 2OH at  $m/z$  896.6 with characteristic fragments. The presence of two hydroxyl group is confirmed by the ion cluster at  $m/z$  586, 558, and 540 (typical for sphingosine base 18:1 OH).

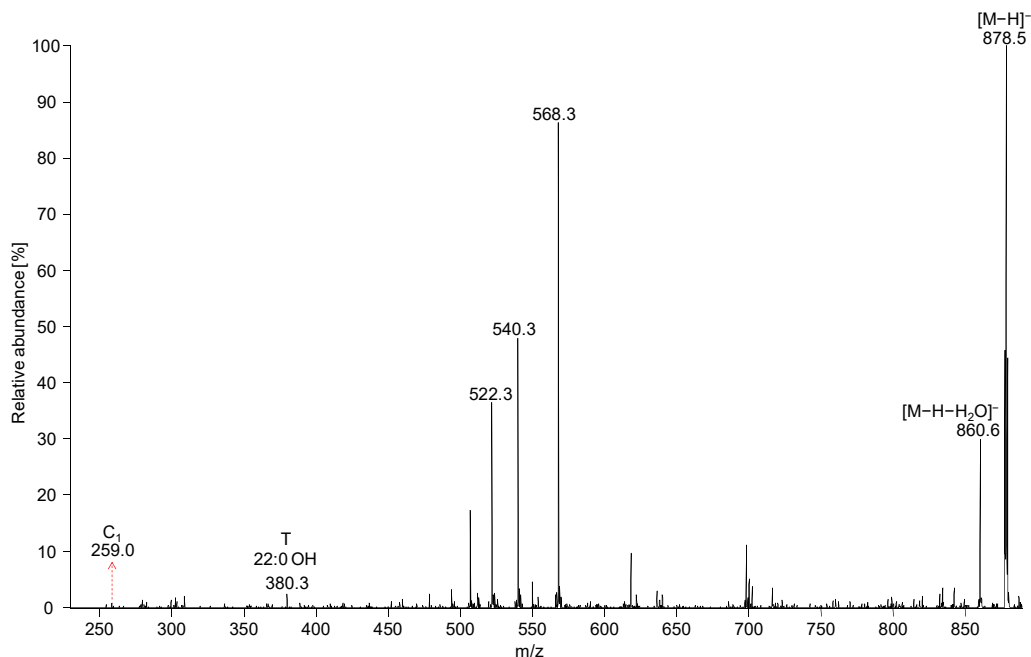

**Figure S98.** MS/MS spectrum of SHexCer 40:1 OH at  $m/z$  878.5 with characteristic fragments. The presence of hydroxyl group is confirmed by the ion cluster at  $m/z$  568, 540, and 522 (typical for sphingosine base 18:1).

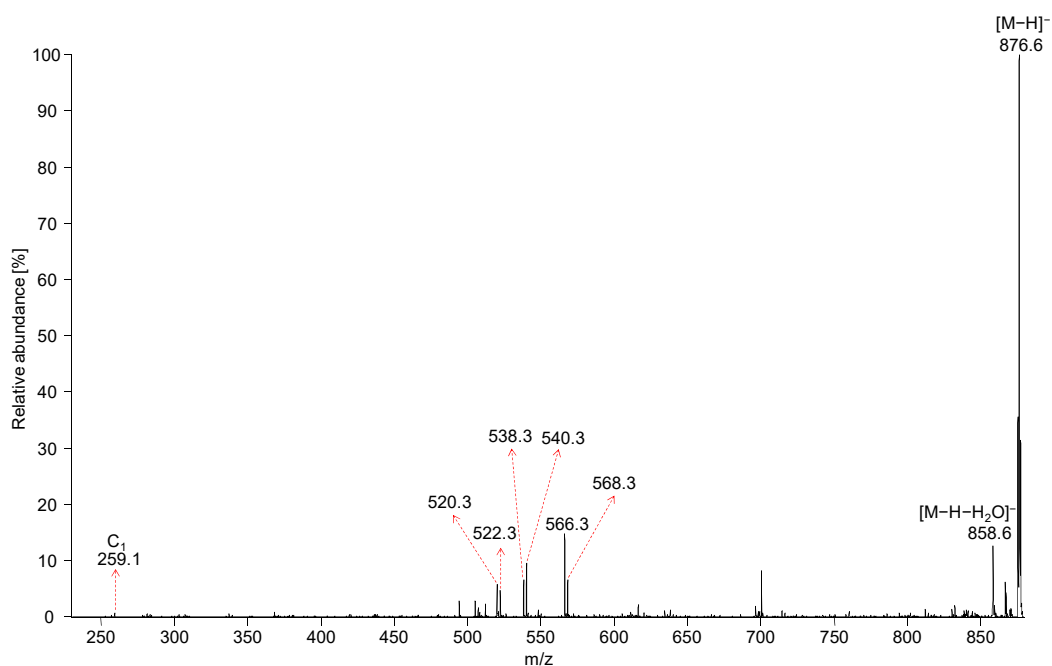

**Figure S99.** MS/MS spectrum of SHexCer 40:2 OH at  $m/z$  876.6 with characteristic fragments. The presence of hydroxyl group is confirmed by the ion cluster at  $m/z$  568, 540, and 522 (typical for sphingosine base 18:1) and  $m/z$  566, 538, and 520 (typical for sphingosine base 18:2).



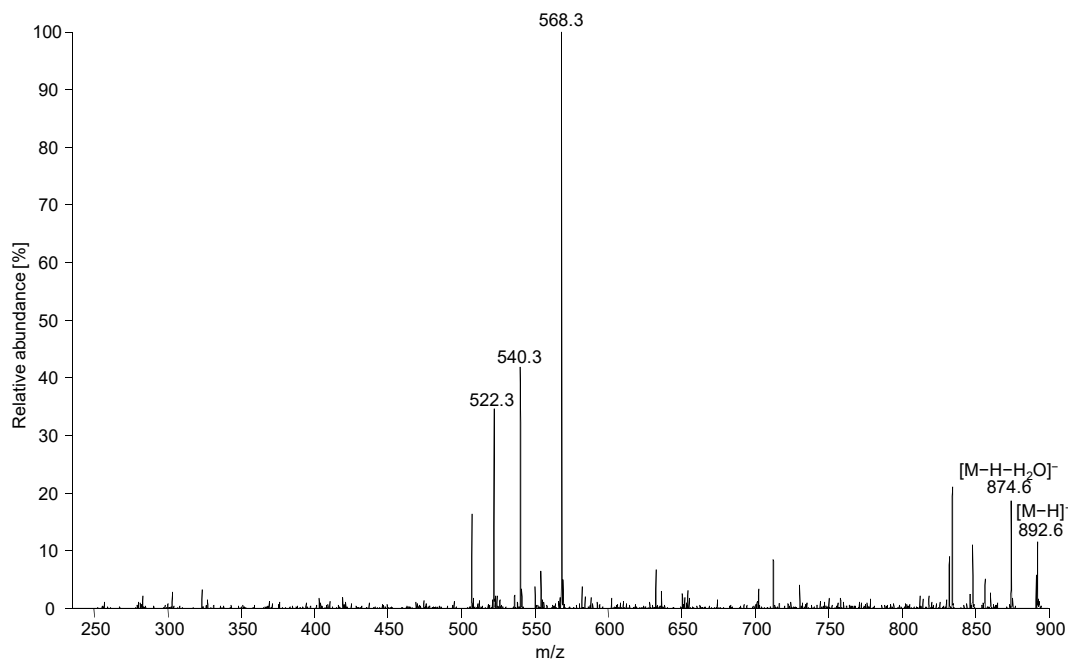

**Figure S100.** MS/MS spectrum of SHexCer 41:1 OH at  $m/z$  892.6 with characteristic fragments. The presence of hydroxyl group is confirmed by the ion cluster at  $m/z$  568, 540, and 522 (typical for sphingosine base 18:1).

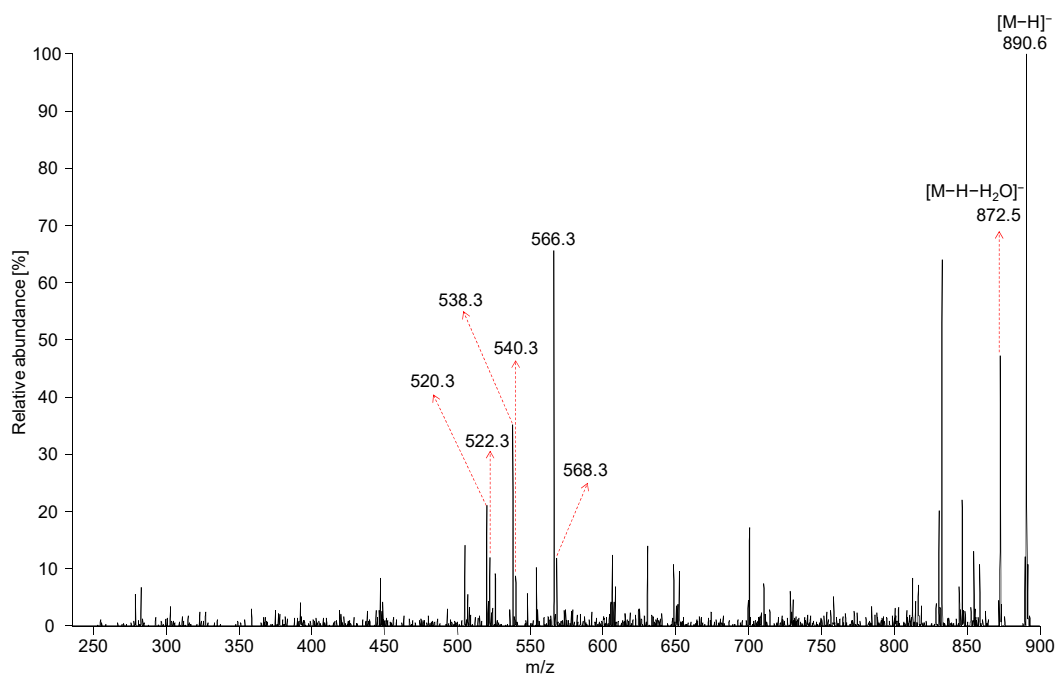

**Figure S101.** MS/MS spectrum of SHexCer 41:2 OH at  $m/z$  890.6 with characteristic fragments. The presence of hydroxyl group is confirmed by the ion cluster at  $m/z$  568, 540, and 522 (typical for sphingosine base 18:1) and  $m/z$  566, 538, and 520 (typical for sphingosine base 18:2).

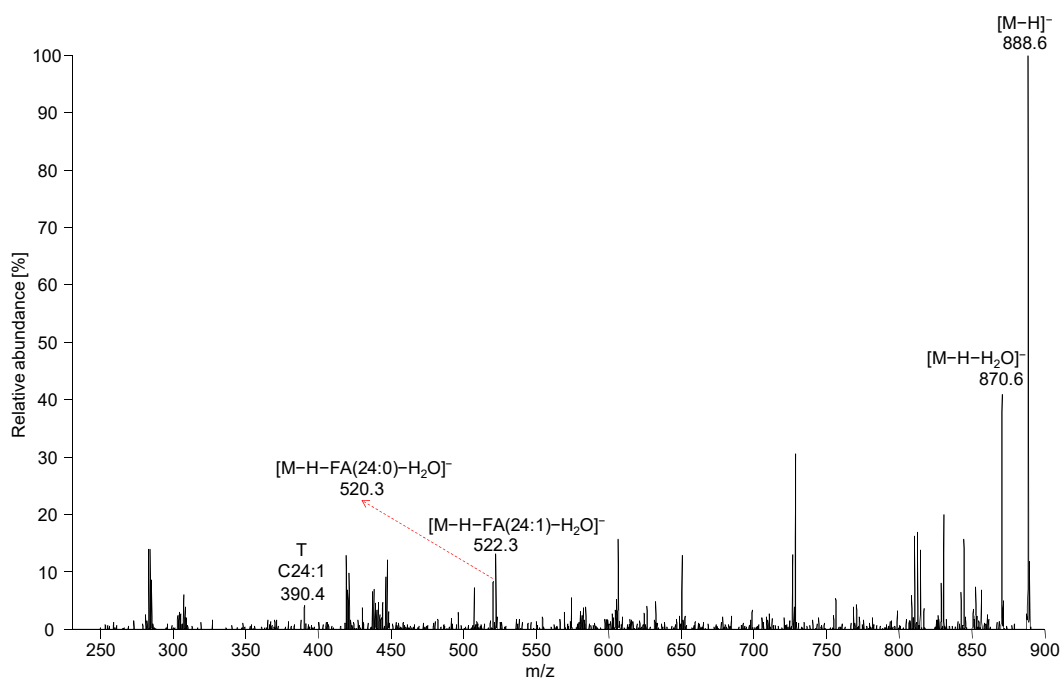

**Figure S102.** MS/MS spectrum of SHexCer 42:2 at  $m/z$  888.6 with characteristic fragments.

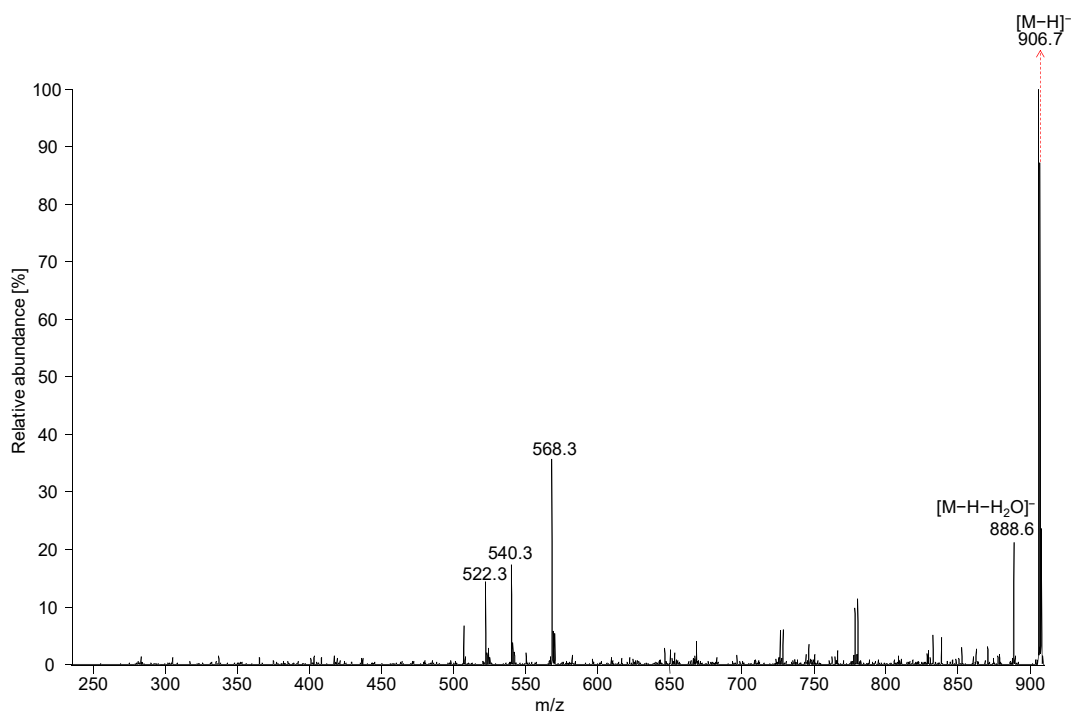

**Figure S103.** MS/MS spectrum of SHexCer 42:1 OH at  $m/z$  906.7 with characteristic fragments. The presence of hydroxyl group is confirmed by the ion cluster at  $m/z$  568, 540, and 522 (typical for sphingosine base 18:1).

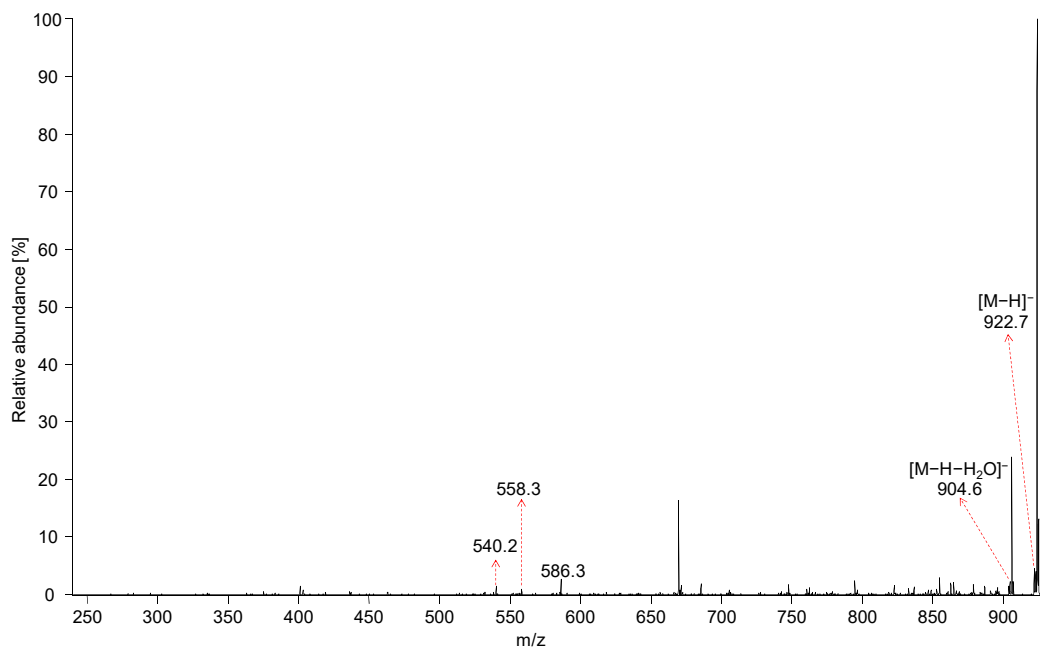

**Figure S104.** MS/MS spectrum of SHexCer 42:1 2OH at  $m/z$  922.7 with characteristic fragments. The presence of two hydroxyl group is confirmed by the ion cluster at  $m/z$  586, 558, and 540 (typical for sphingosine base 18:1 OH).

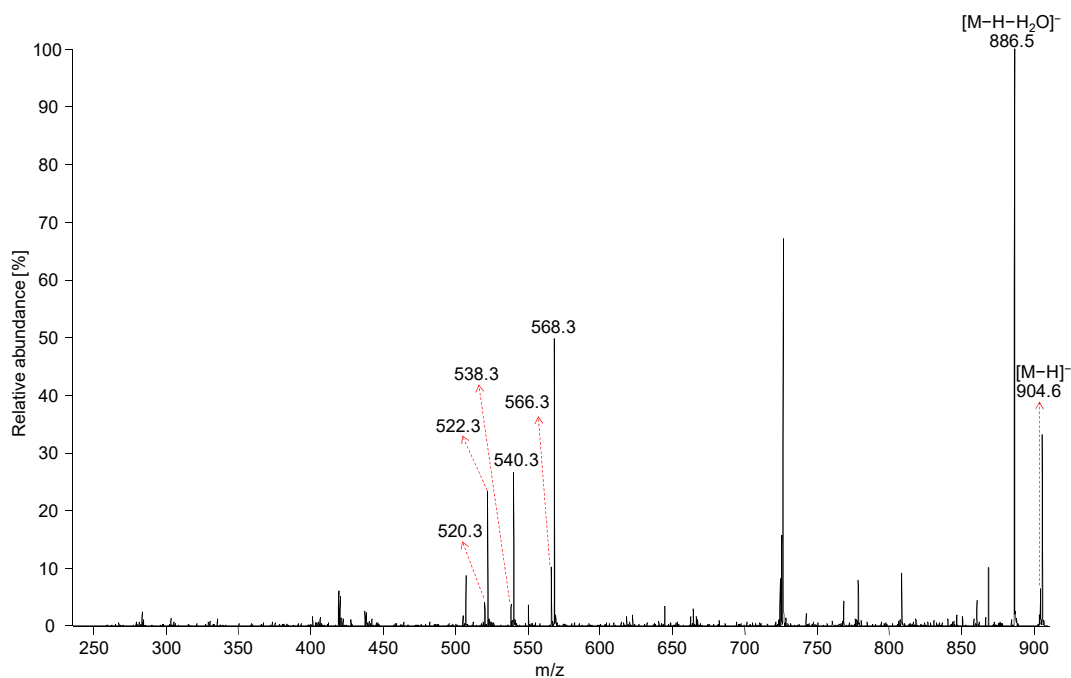

**Figure S105.** MS/MS spectrum of SHexCer 42:2 OH at  $m/z$  904.6 with characteristic fragments. The presence of hydroxyl group is confirmed by the ion cluster at  $m/z$  568, 540, and 522 (typical for sphingosine base 18:1) and  $m/z$  566, 538, and 520 (typical for sphingosine base 18:2).

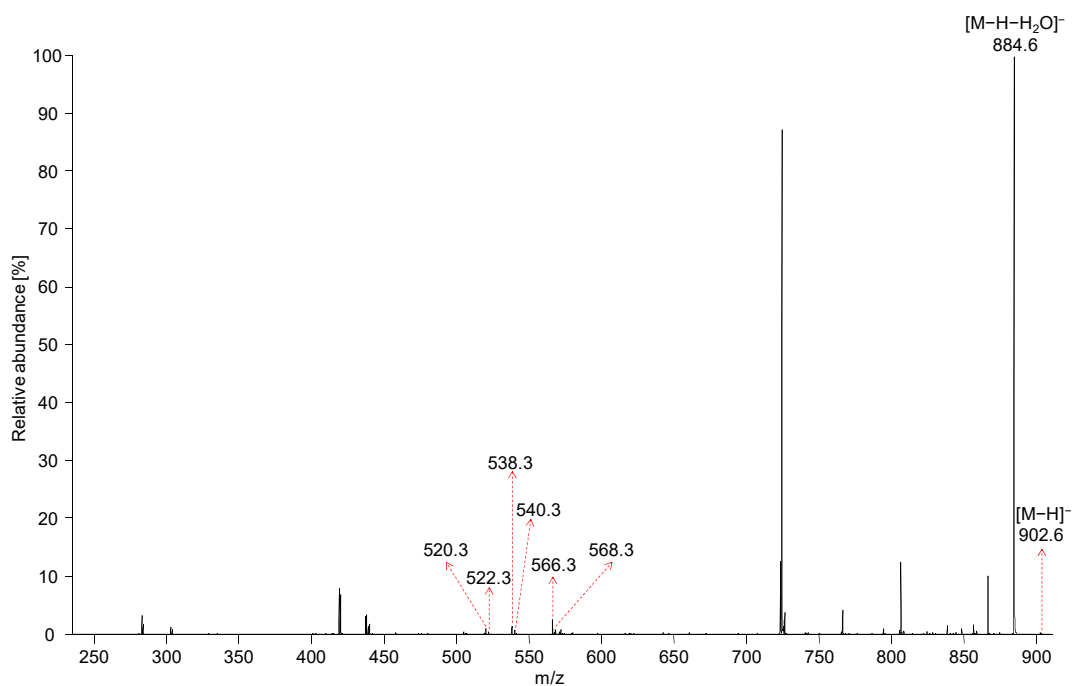

**Figure S106.** MS/MS spectrum of SHexCer 42:3 OH at  $m/z$  902.6 with characteristic fragments. The presence of hydroxyl group is confirmed by the ion cluster at  $m/z$  568, 540, and 522 (typical for sphingosine base 18:1) and  $m/z$  566, 538, and 520 (typical for sphingosine base 18:2).

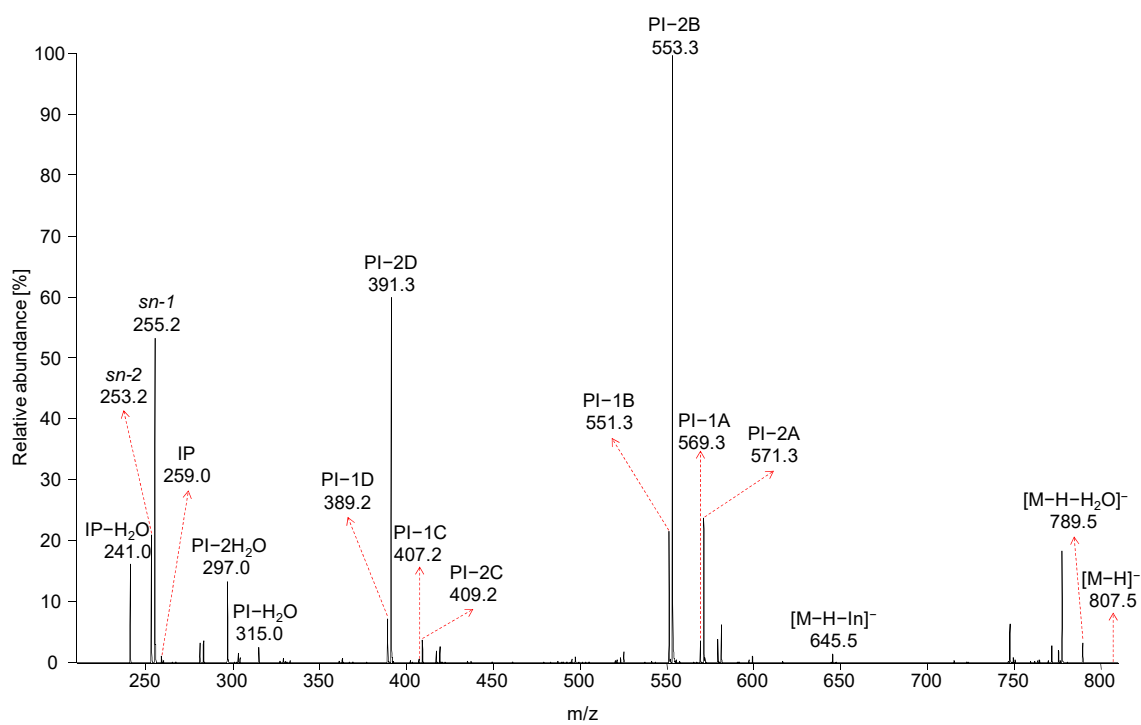

**Figure S107.** MS/MS spectrum of PI 32:1 at  $m/z$  807.5 with characteristic fragments.

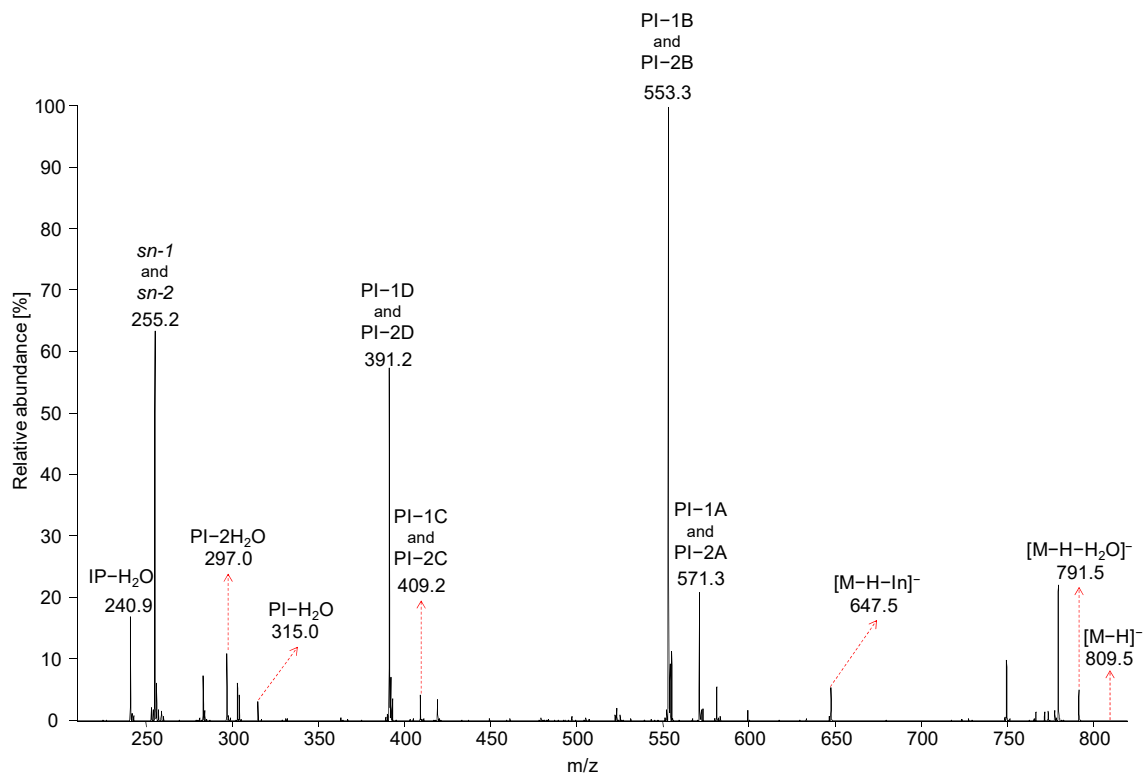

**Figure S108.** MS/MS spectrum of PI 32:0 at  $m/z$  809.5 with characteristic fragments.

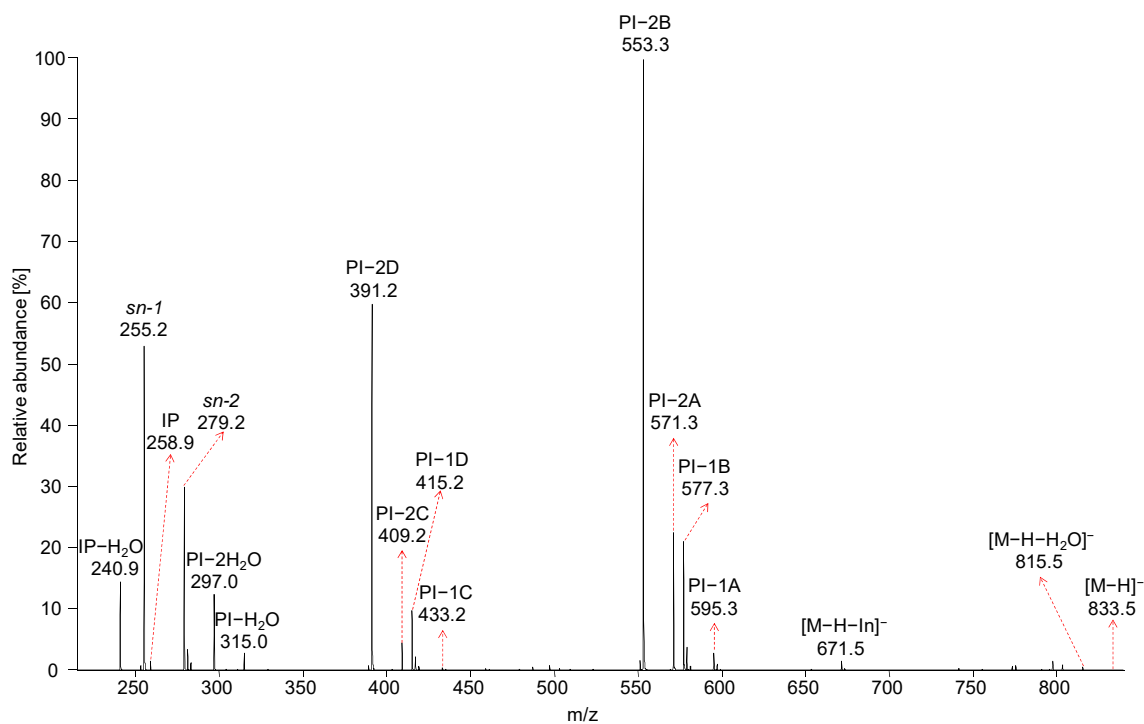

**Figure S109.** MS/MS spectrum of PI 34:2 at  $m/z$  833.5 with characteristic fragments.

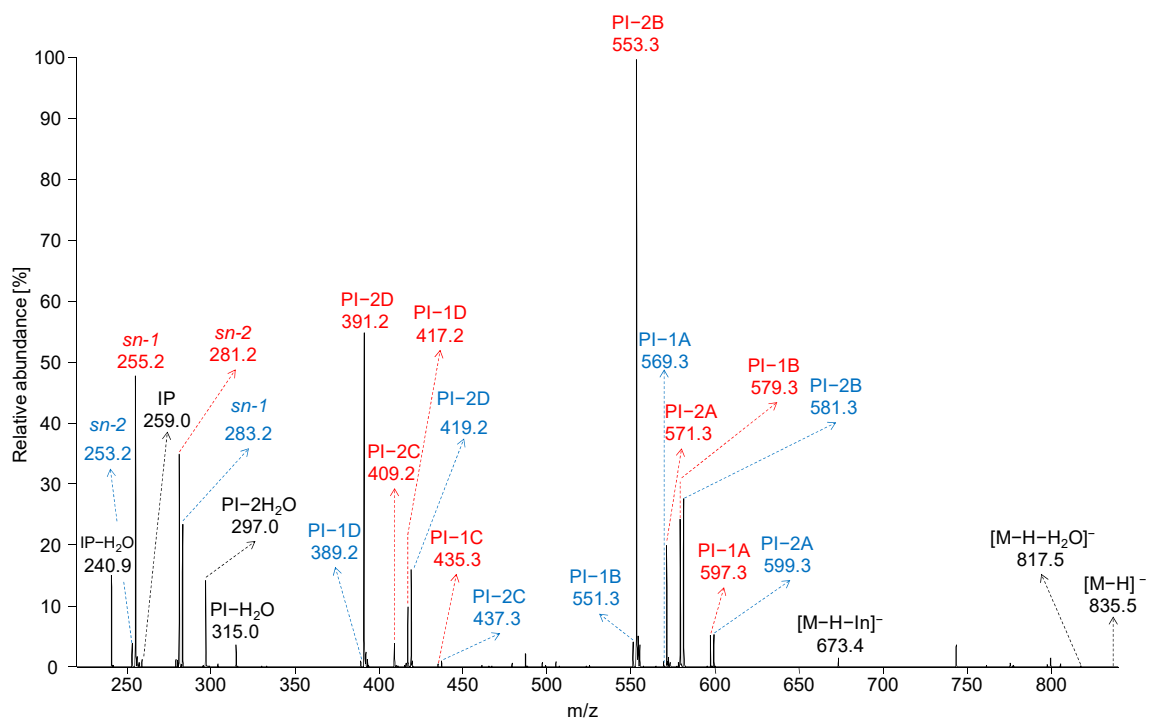

**Figure S110.** MS/MS spectrum of PI 34:1 at  $m/z$  835.5 with characteristic fragments. The specific fragments for PI 16:0/18:1 (red color) and PI 18:0/16:1 (blue color) are shown.

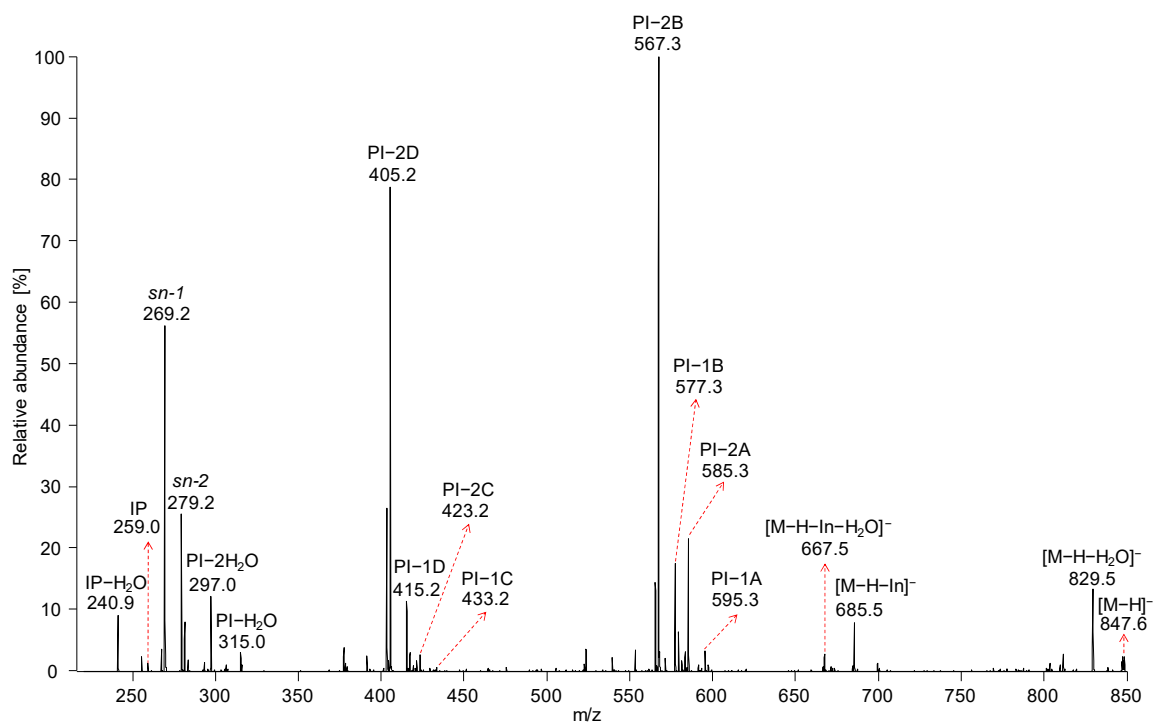

**Figure S111.** MS/MS spectrum of PI 35:2 at  $m/z$  847.6 with characteristic fragments.

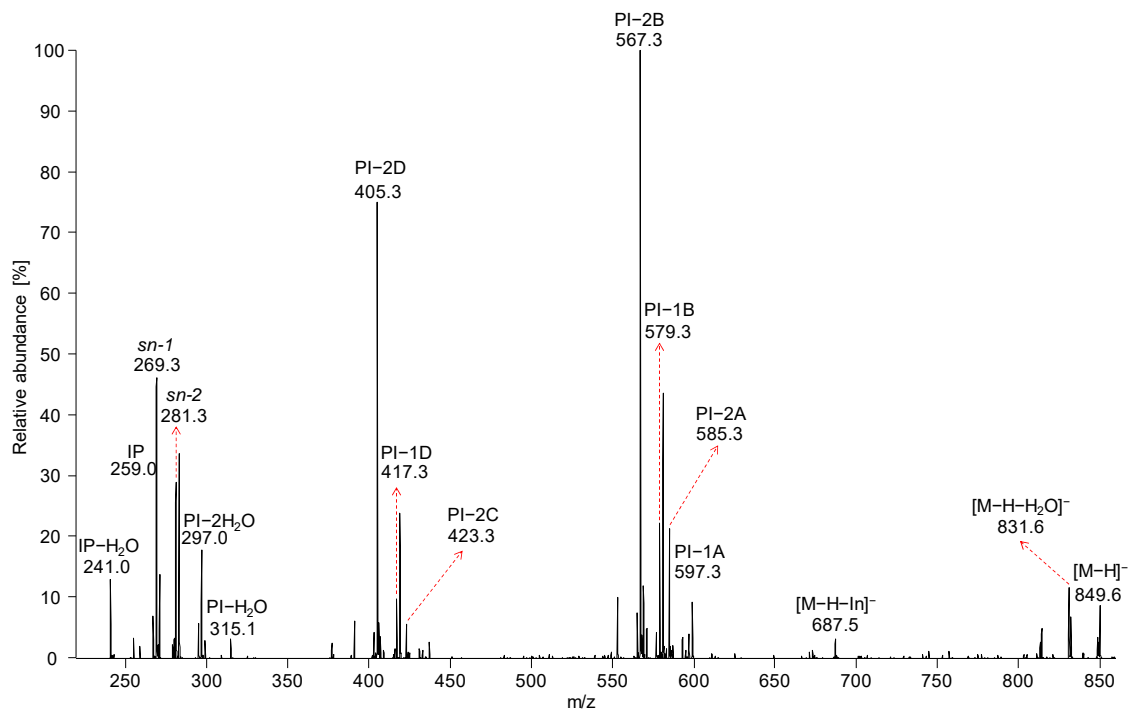

**Figure S112.** MS/MS spectrum of PI 35:1 at  $m/z$  849.6 with characteristic fragments.

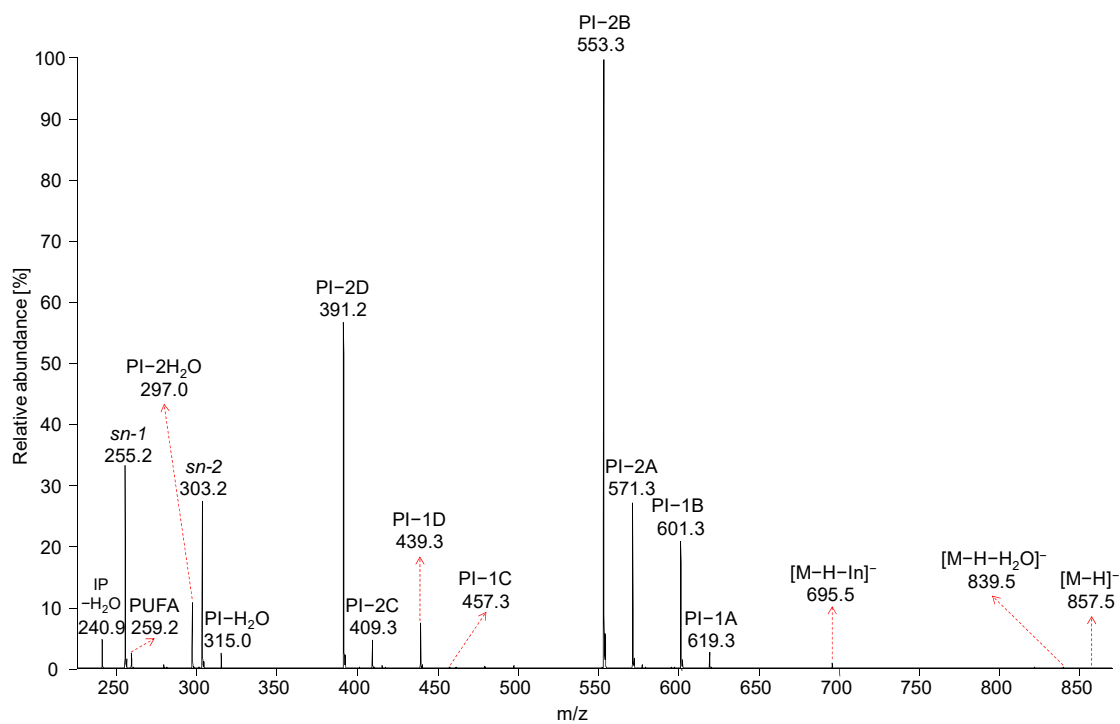

**Figure S113.** MS/MS spectrum of PI 36:4 at  $m/z$  857.5 with characteristic fragments.

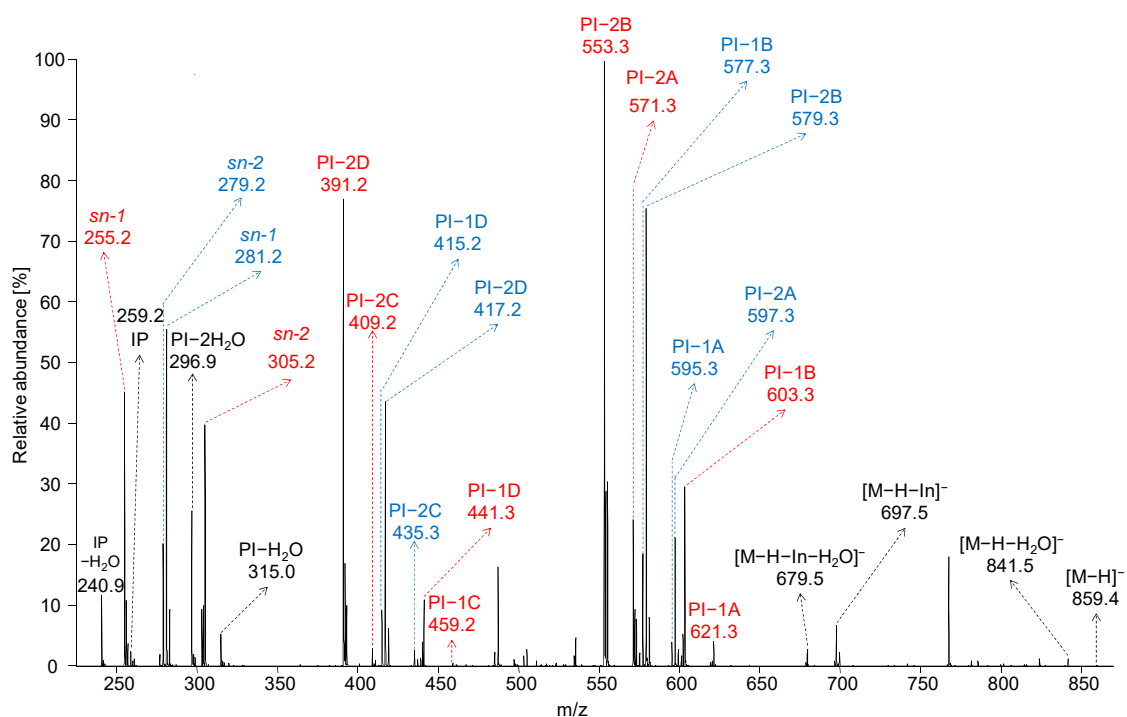

**Figure S114.** MS/MS spectrum of PI 36:3 at  $m/z$  859.4 with characteristic fragments. The specific fragments for PI 16:0/20:3 (red color) and PI 18:1/18:2 (blue color) are shown.

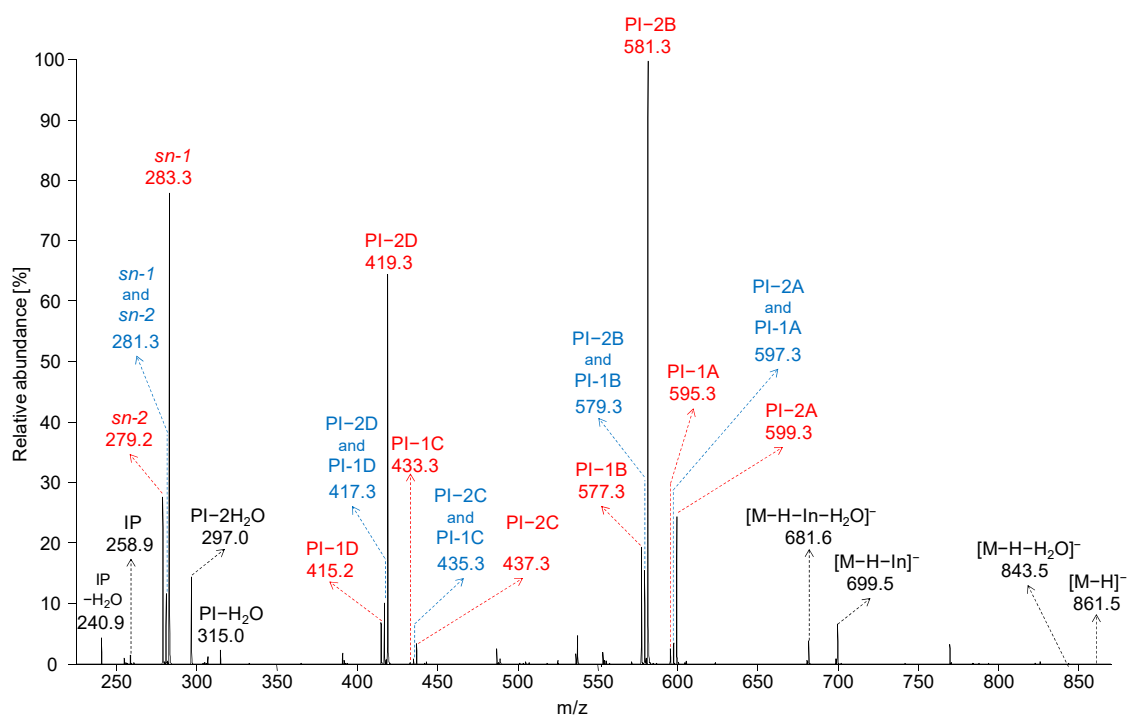

**Figure S115.** MS/MS spectrum of PI 36:2 at  $m/z$  861.5 with characteristic fragments. The specific fragments for PI 18:0/18:2 (red color) and PI 18:1/18:1 (blue color) are shown.



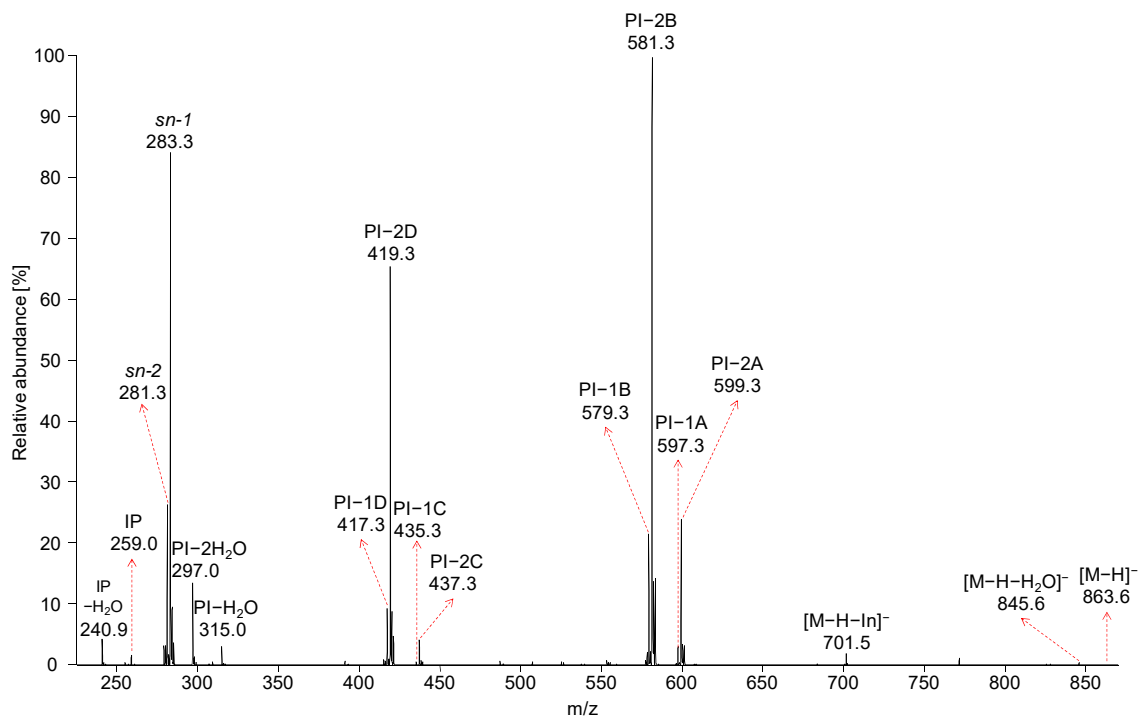

**Figure S116.** MS/MS spectrum of PI 36:1 at  $m/z$  863.6 with characteristic fragments.

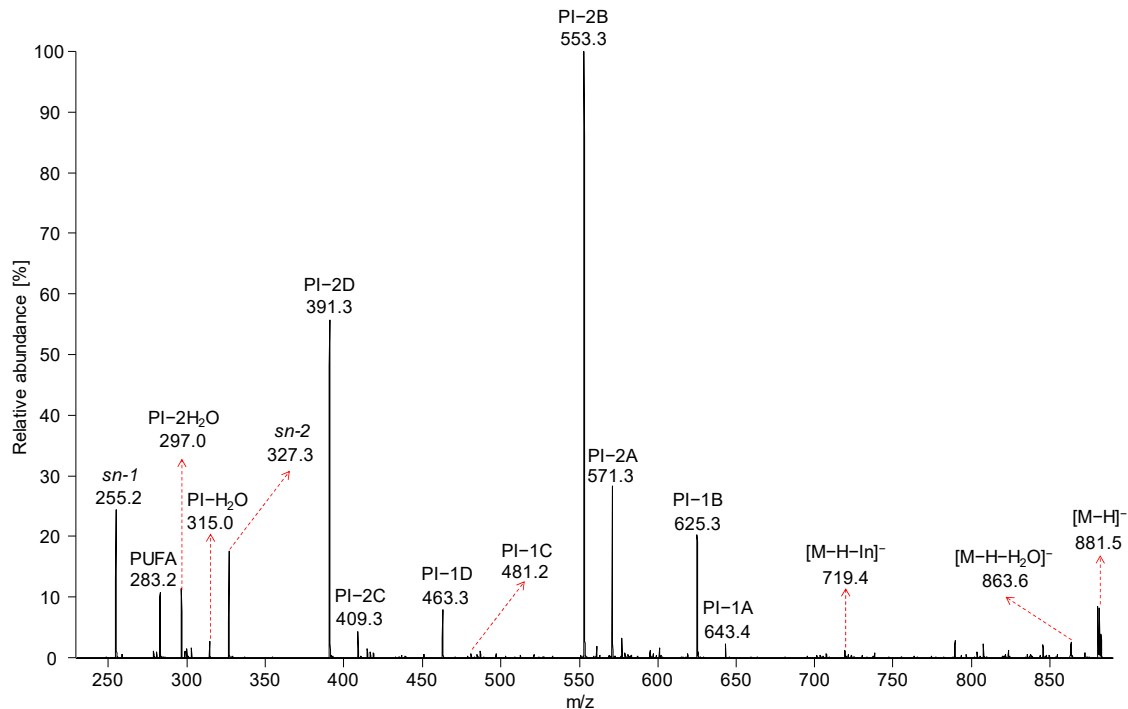

**Figure S117.** MS/MS spectrum of PI 38:6 at  $m/z$  881.5 with characteristic fragments.

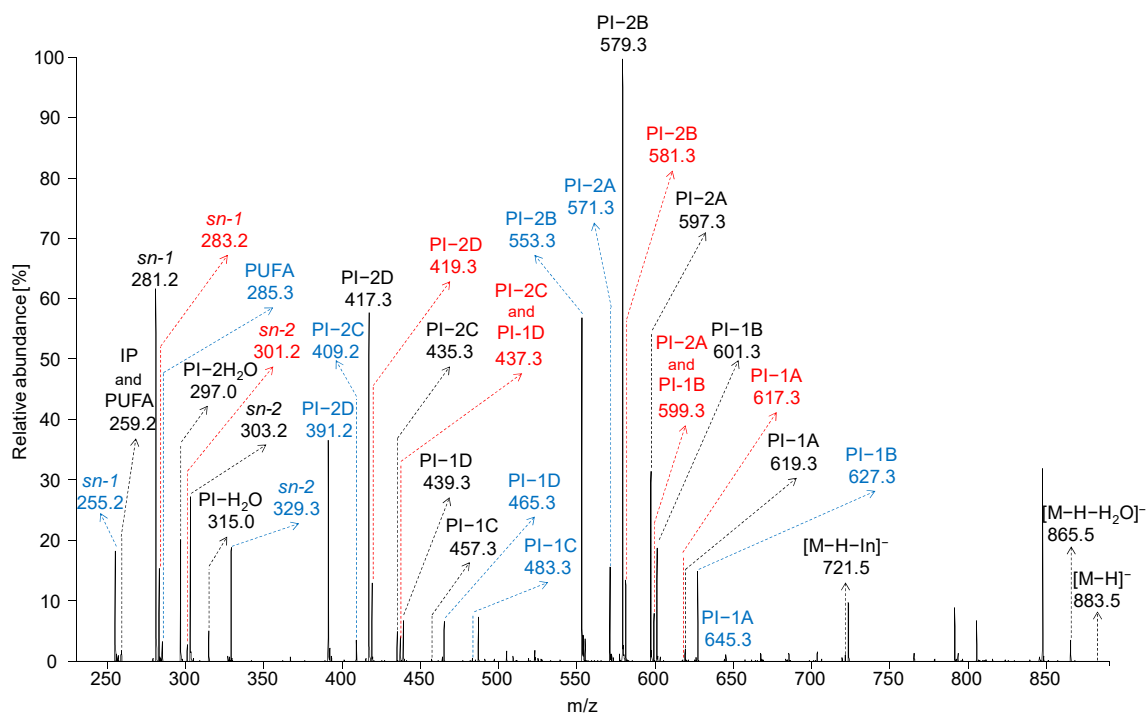

**Figure S118.** MS/MS spectrum of PI 38:5 at  $m/z$  883.5 with characteristic fragments. The specific fragments for PI 18:1/20:4 (black color), PI 18:0/20:5 (red color), and PI 16:0/22:5 (blue color) are shown.

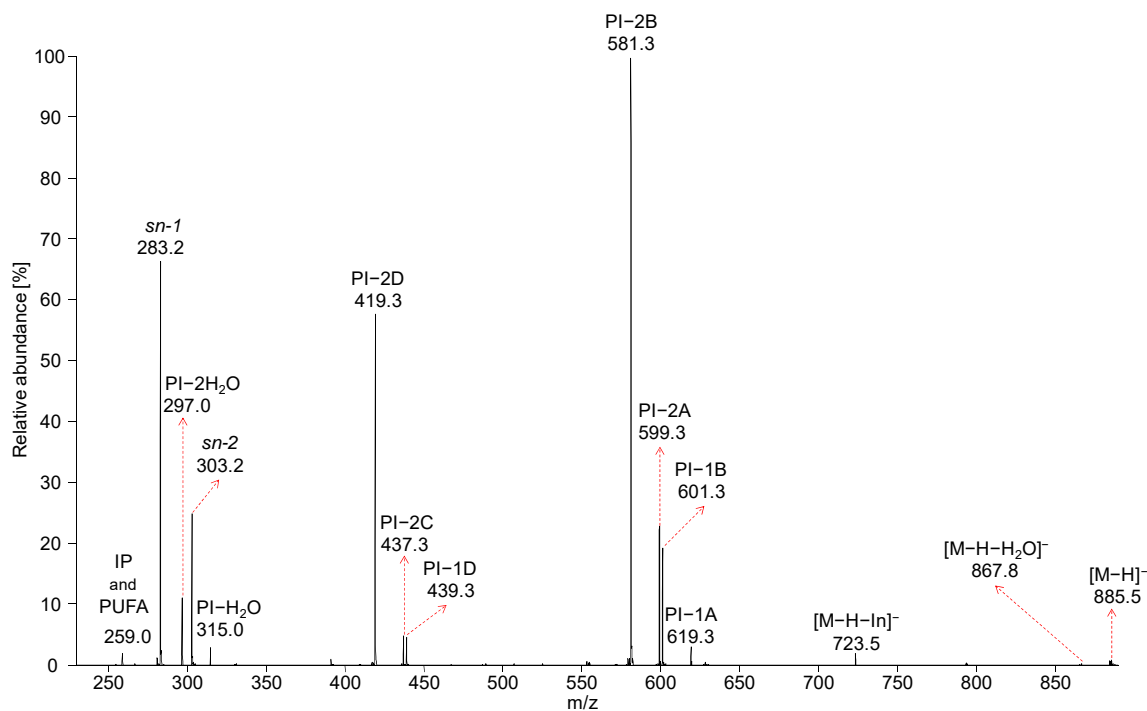

**Figure S119.** MS/MS spectrum of PI 38:4 at  $m/z$  885.5 with characteristic fragments.

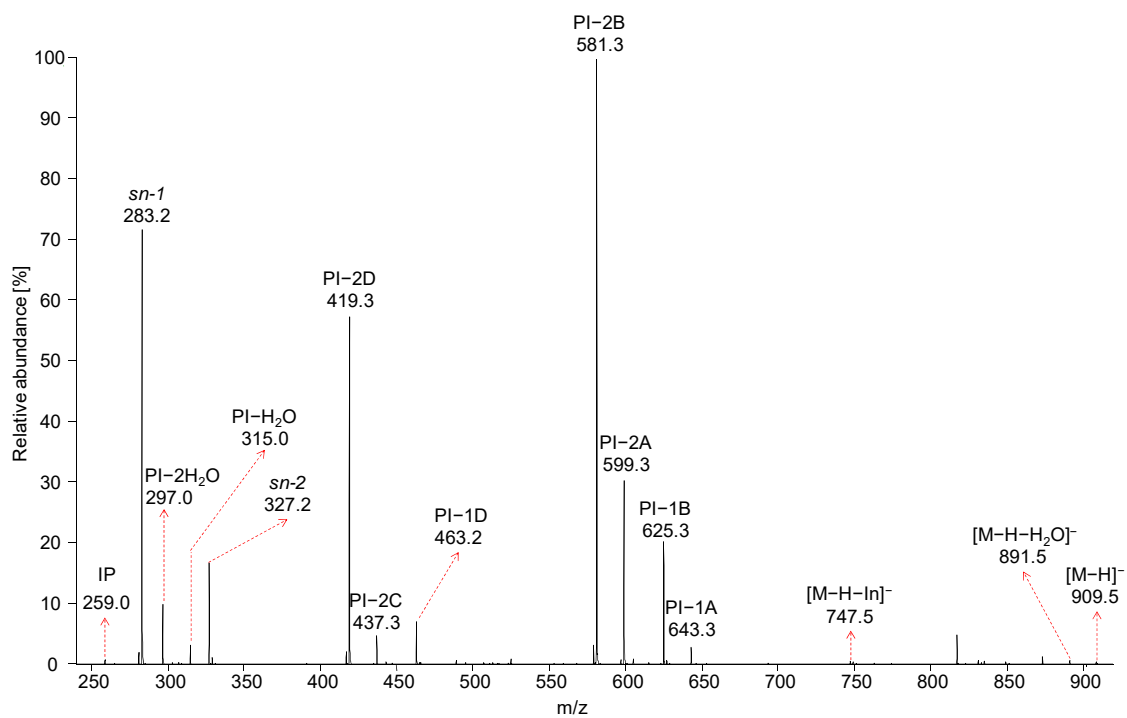

**Figure S120.** MS/MS spectrum of PI 40:6 at  $m/z$  909.5 with characteristic fragments.

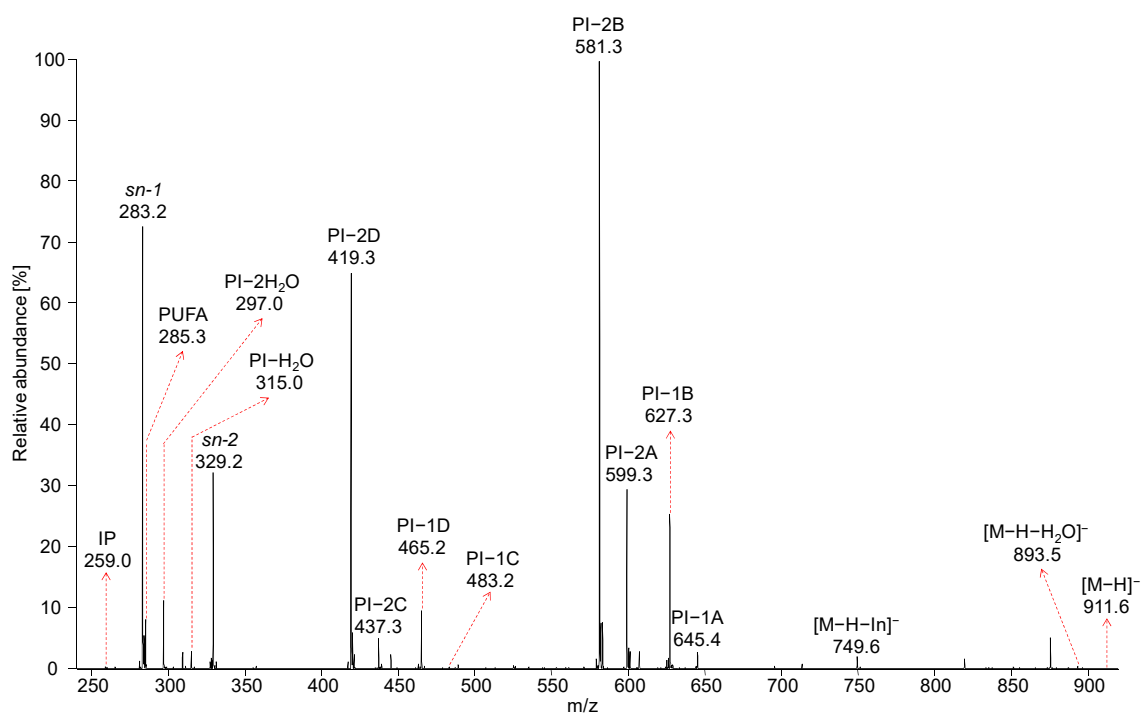

**Figure S121.** MS/MS spectrum of PI 40:5 at  $m/z$  911.6 with characteristic fragments.

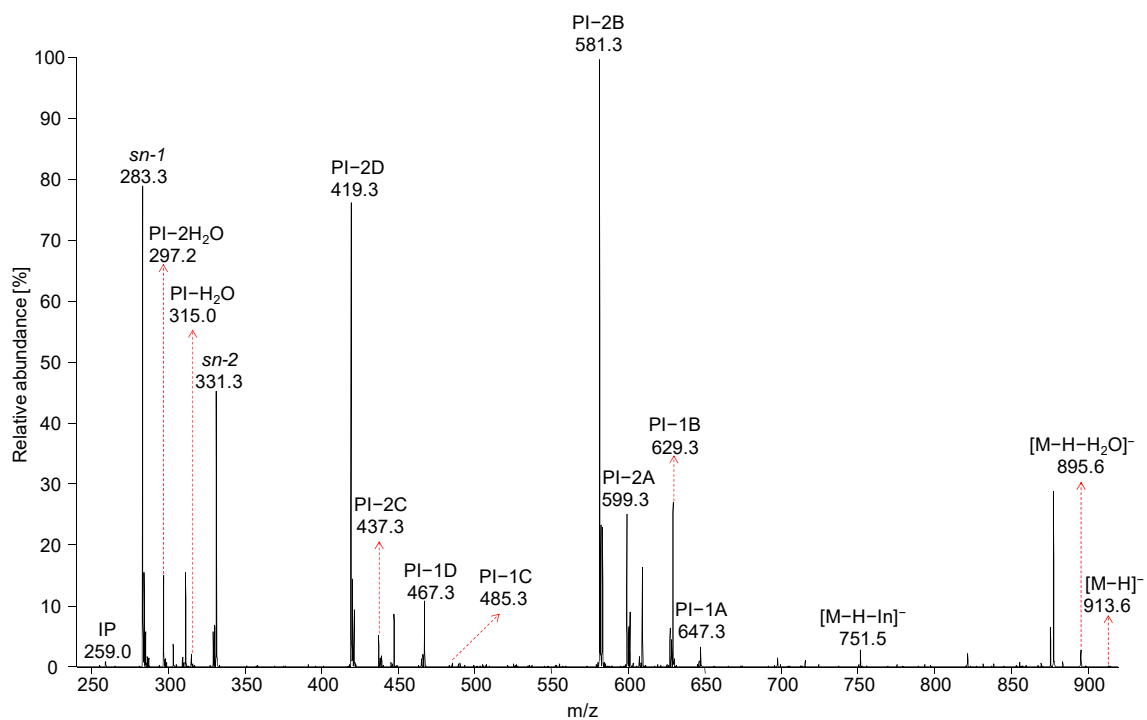

**Figure S122.** MS/MS spectrum of PI 40:4 at  $m/z$  913.6 with characteristic fragments.

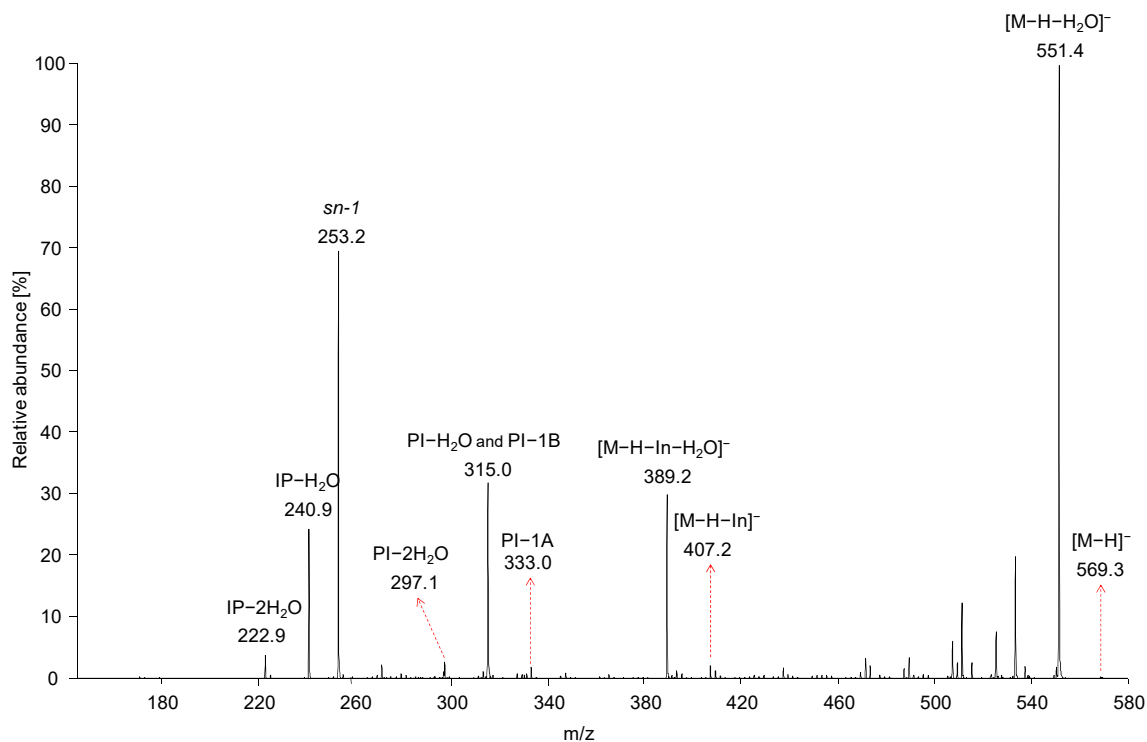

**Figure S123.** MS/MS spectrum of LPI 16:1 at  $m/z$  569.3 with characteristic fragments.

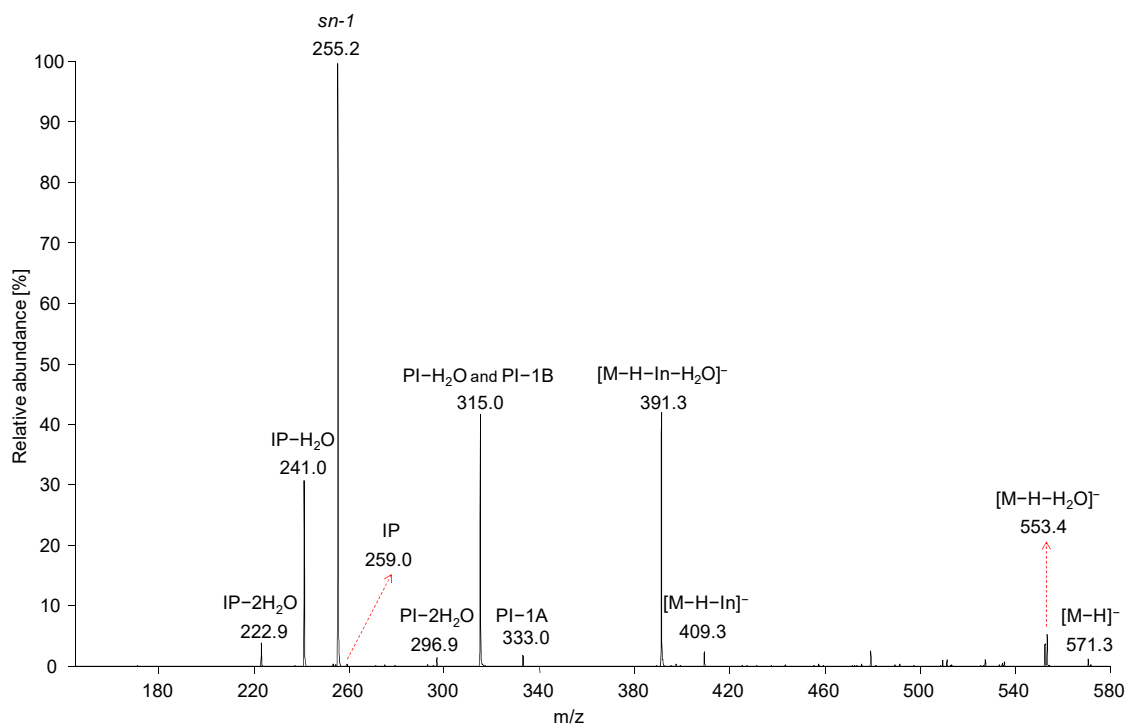

**Figure S124.** MS/MS spectrum of LPI 16:0 at  $m/z$  571.3 with characteristic fragments.

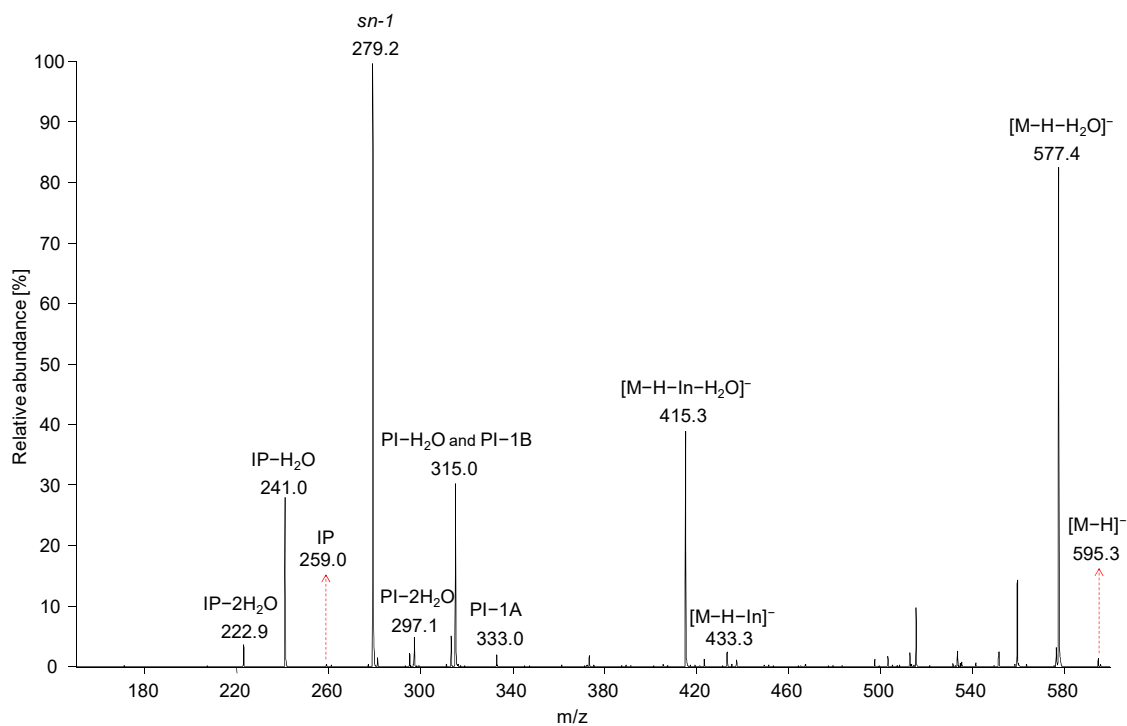

**Figure S125.** MS/MS spectrum of LPI 18:2 at  $m/z$  595.3 with characteristic fragments.

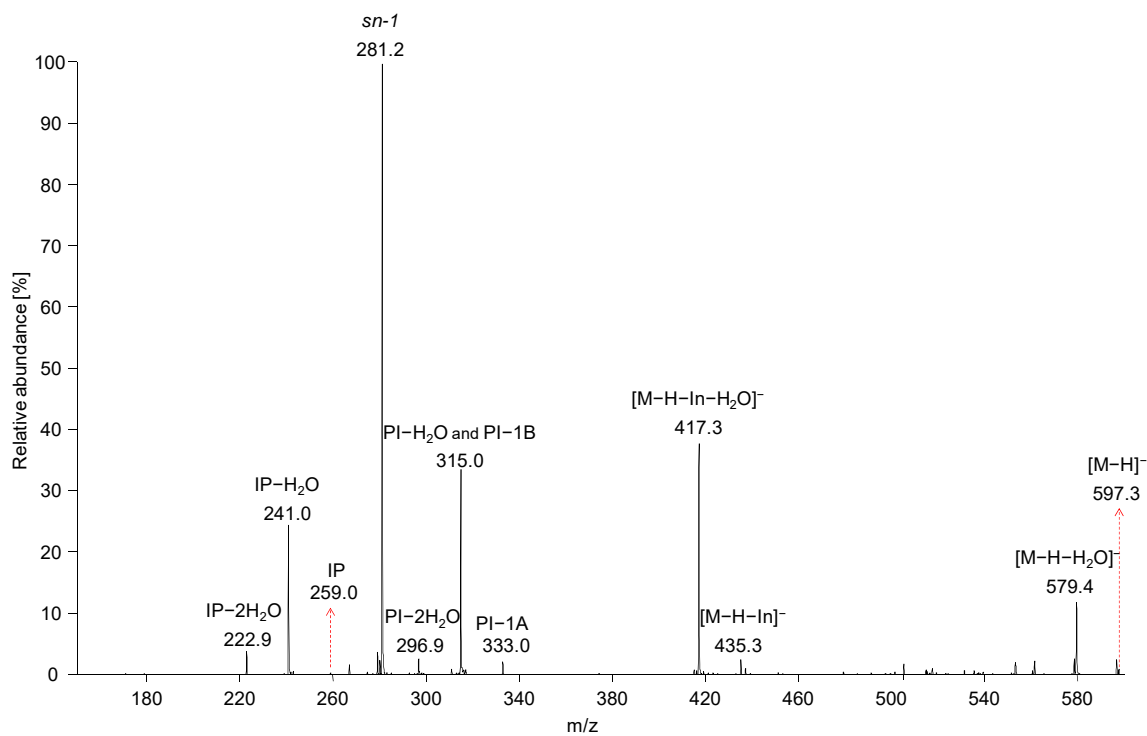

**Figure S126.** MS/MS spectrum of LPI 18:1 at  $m/z$  597.3 with characteristic fragments.

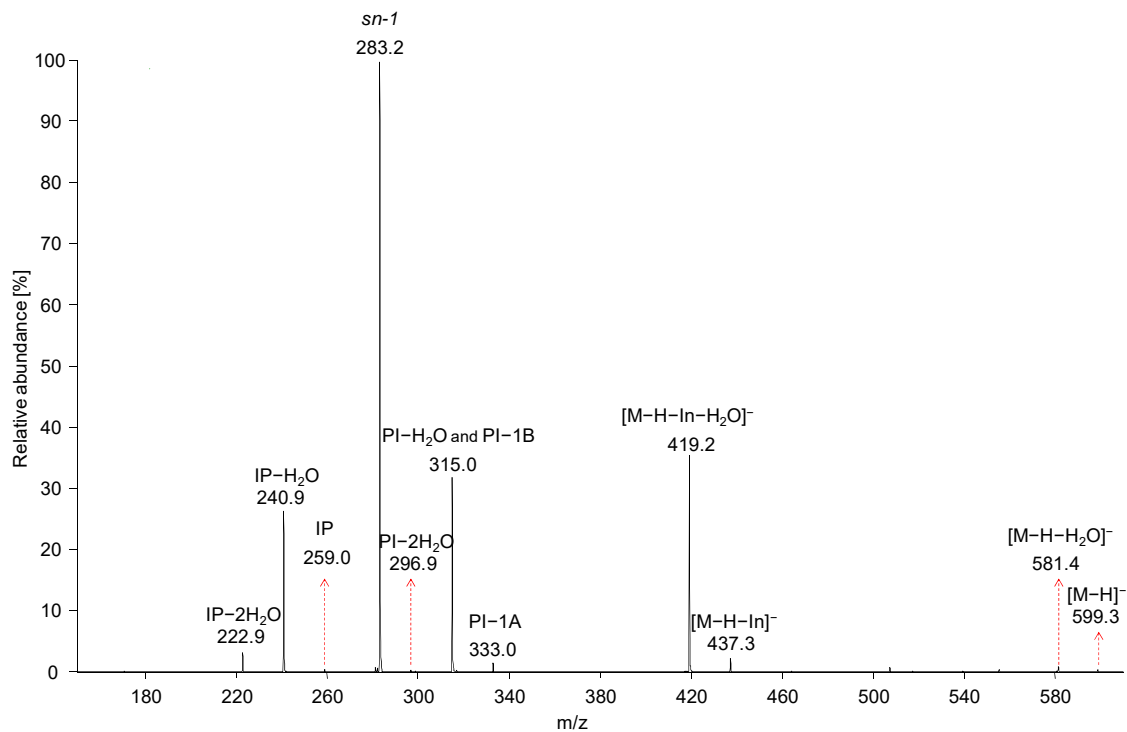

**Figure S127.** MS/MS spectrum of LPI 18:0 at  $m/z$  599.3 with characteristic fragments.

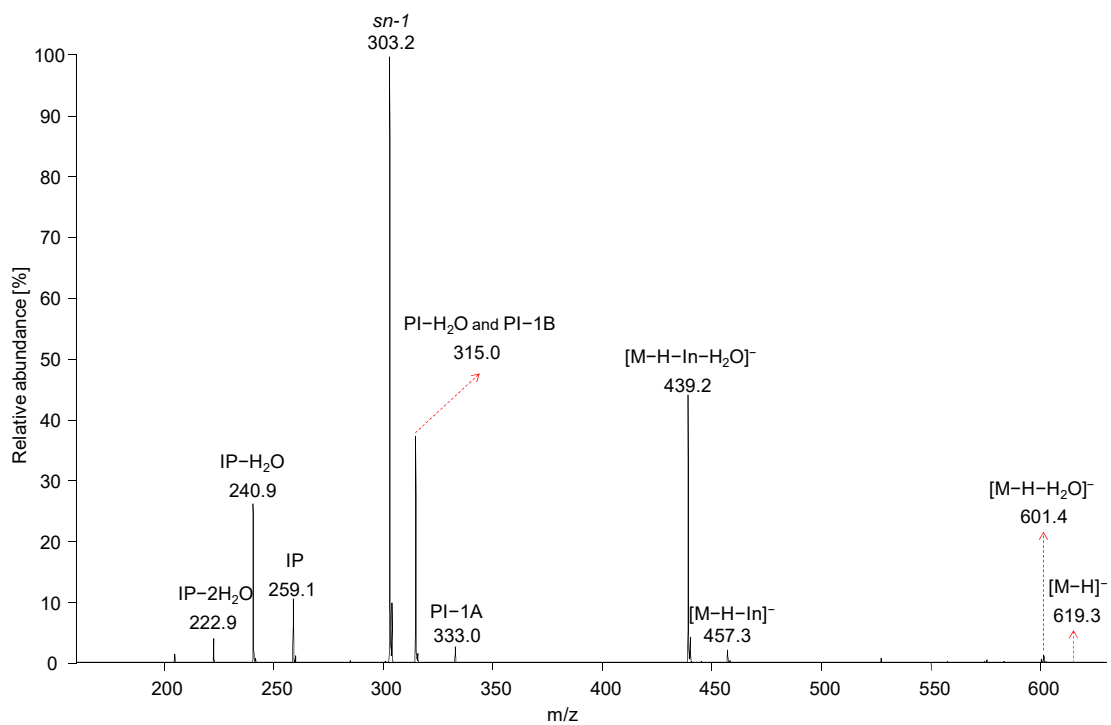

**Figure S128.** MS/MS spectrum of LPI 20:4 at  $m/z$  619.3 with characteristic fragments.

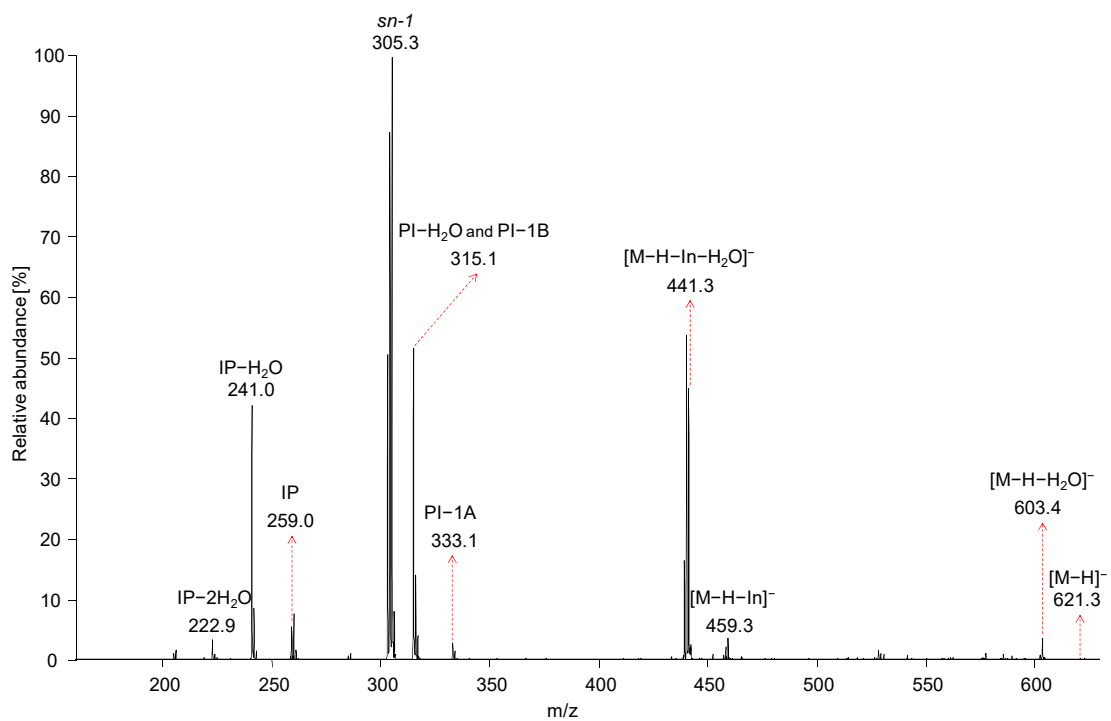

**Figure S129.** MS/MS spectrum of LPI 20:3 at  $m/z$  621.3 with characteristic fragments.

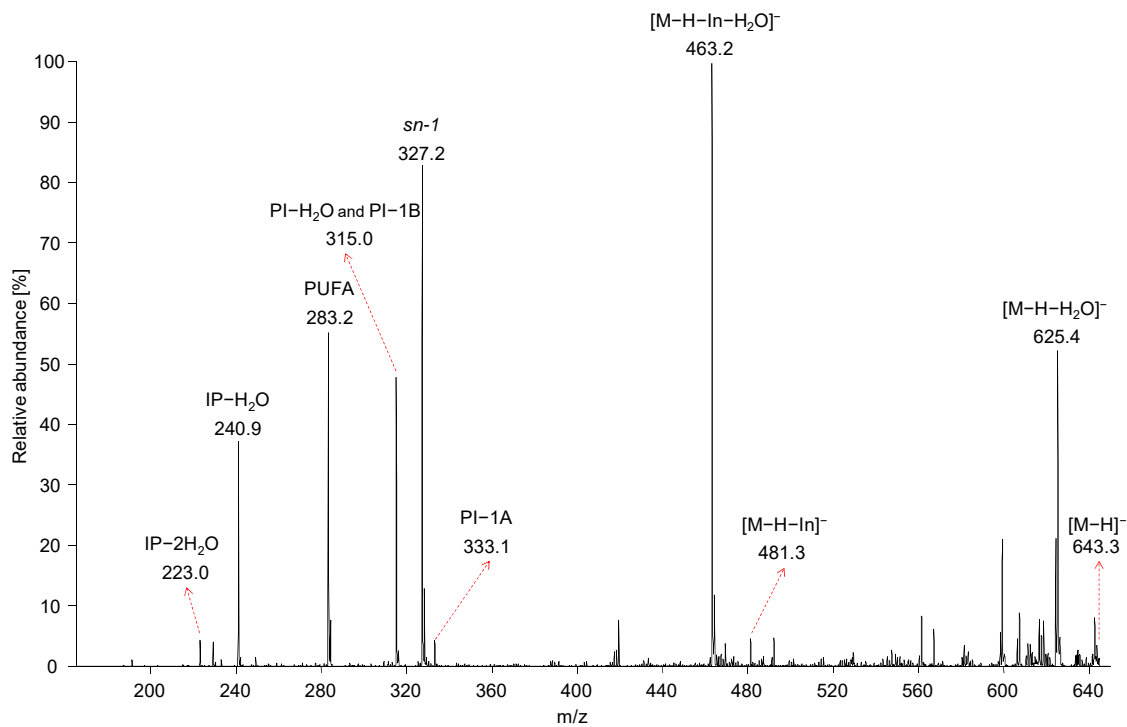

**Figure S130.** MS/MS spectrum of LPI 22:6 at  $m/z$  643.3 with characteristic fragments.

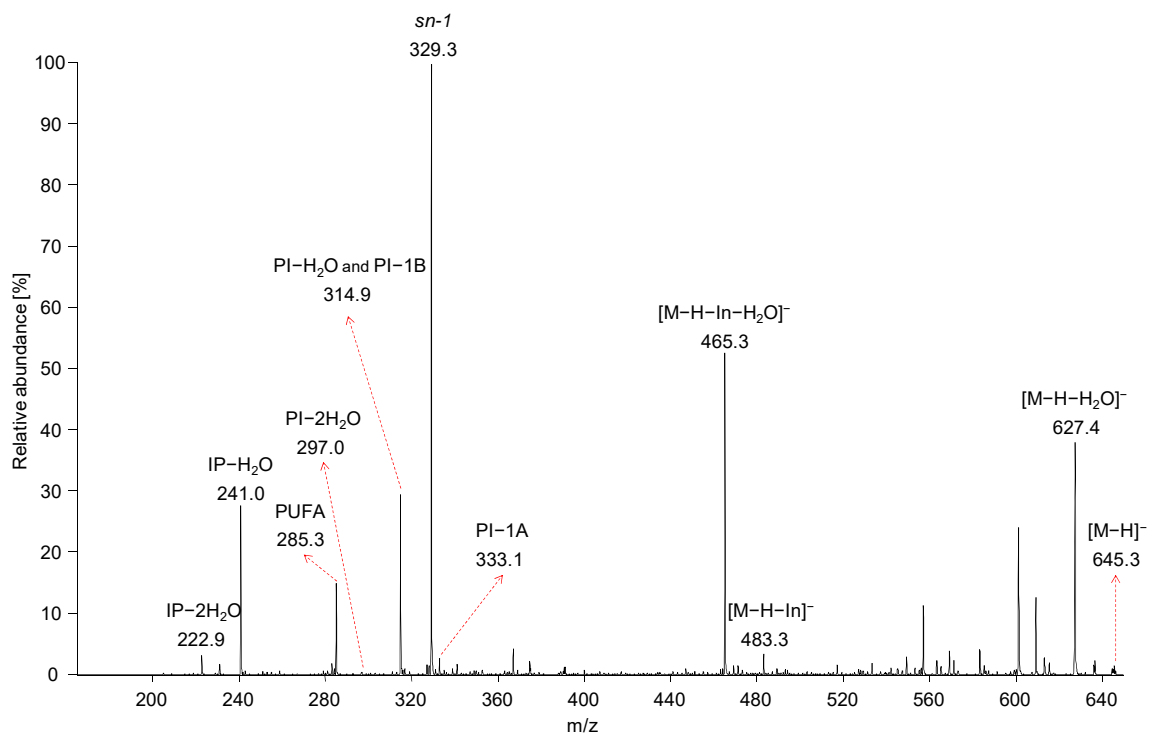

**Figure S131.** MS/MS spectrum of LPI 22:5 at  $m/z$  645.3 with characteristic fragments.
